# Supplementary material for: Transcriptomic Analysis of the Interaction Between FLOWERING LOCUS T Induction and Photoperiodic Signaling in Response to Spaceflight
Source: Front Cell Dev Biol. 2022 Feb 1;9:813246. doi: 10.3389/fcell.2021.813246 (PMC8844200; doi:10.3389/fcell.2021.813246)
Supplement: Supplementary file 13 [file Table7.XLSX]

## Sheet: FG-SD-sp.vs.FG-SD-gr
Supplementary Table S7 Expression data of identified genes of pHSP::FT, pHSP:GFP (FG) transgenic plants grown under the short-day(SD) in space (FG-SD-sp) were compared with those under the SD on ground(FG-SD-gr)
probe_set_ID	gene title	gene symbol	ensembl	sample_1	sample_2	value_1	value_2	log2(value_1/value_2)	p_value
247684_at	Leucine-rich repeat protein kinase family protein	AT5G59670	AT5G59670	FG-SD-sp	FG-SD-gr	65.5545	1.03877	5.97974	0.0427831
245947_at	ACL5 (ACAULIS 5); spermine synthase/ thermospermine synthase	ACL5	AT5G19530	FG-SD-sp	FG-SD-gr	273.439	8.19062	5.0611	0.0544657
254066_at	DREB1A (DEHYDRATION RESPONSE ELEMENT B1A); DNA binding / transcription activator/ transcription factor	DREB1A	AT4G25480	FG-SD-sp	FG-SD-gr	1779.04	56.8454	4.96791	0.0254374
250914_at	TRFL10 (TRF-LIKE 10); DNA binding	TRFL10	AT5G03780	FG-SD-sp	FG-SD-gr	88.7379	3.38308	4.71314	0.0217093
262454_at	BFN1 (BIFUNCTIONAL NUCLEASE I); T/G mismatch-specific endonuclease/ endoribonuclease, producing 5'-phosphomonoesters / nucleic acid binding / single-stranded DNA specific endodeoxyribonuclease	BFN1	AT1G11190	FG-SD-sp	FG-SD-gr	483.792	32.9075	3.8779	0.0110152
266376_at	xyloglucan endotransglucosylase/hydrolase protein 10	XTH10	AT2G14620	FG-SD-sp	FG-SD-gr	833.139	59.0105	3.81951	0.00993709
267182_at	filament-like plant protein 7	AT2G23360	AT2G23360	FG-SD-sp	FG-SD-gr	55.9157	4.47051	3.64474	0.054972
257035_at	CYP707A4; (+)-abscisic acid 8'-hydroxylase/ oxygen binding	CYP707A4	AT3G19270	FG-SD-sp	FG-SD-gr	285.157	24.1016	3.56455	0.0528106
248279_at	ATIM (TIMELESS)	ATIM	AT5G52910	FG-SD-sp	FG-SD-gr	1305.15	111.406	3.55031	0.00369446
267080_at	transmembrane amino acid transporter family protein	AT2G41190	AT2G41190	FG-SD-sp	FG-SD-gr	3148.53	286.258	3.45929	0.0438386
254074_at	CBF1 (C-REPEAT/DRE BINDING FACTOR 1); DNA binding / transcription activator/ transcription factor	CBF1	AT4G25490	FG-SD-sp	FG-SD-gr	2589.79	236.925	3.45033	0.019846
258166_at	transducin/WD40 domain-containing protein	AT3G21540	AT3G21540	FG-SD-sp	FG-SD-gr	150.829	14.4239	3.38638	0.018774
250826_at	hypothetical protein	AT5G05220	AT5G05220	FG-SD-sp	FG-SD-gr	219.413	22.3841	3.2931	0.0444721
256300_at	NAP (NAC-like, activated by AP3/PI); transcription factor	NAP	AT1G69490	FG-SD-sp	FG-SD-gr	16269.2	1682.13	3.27378	0.0412507
266364_at	hypothetical protein	AT2G41230	AT2G41230	FG-SD-sp	FG-SD-gr	3316.77	346.896	3.2572	0.0155235
265837_at	LURP1 (LATE UPREGULATED IN RESPONSE TO HYALOPERONOSPORA PARASITICA)	LURP1	AT2G14560	FG-SD-sp	FG-SD-gr	6886.52	731.828	3.2342	0.0460015
264217_at	U-box domain-containing protein 19	AT1G60190	AT1G60190	FG-SD-sp	FG-SD-gr	6273.26	686.939	3.19096	0.0411482
260527_at	transcription factor UPBEAT1	AT2G47270	AT2G47270	FG-SD-sp	FG-SD-gr	3376.7	374.743	3.17164	0.0421545
250942_at	lectin-like protein	AT5G03350	AT5G03350	FG-SD-sp	FG-SD-gr	383.686	43.9563	3.12578	0.0357719
251476_at	hypothetical protein	AT3G59670	AT3G59670	FG-SD-sp	FG-SD-gr	222.067	25.6137	3.11601	0.0122675
248764_at	NF-YB2 (NUCLEAR FACTOR Y, SUBUNIT B2); transcription factor	NF-YB2	AT5G47640	FG-SD-sp	FG-SD-gr	1240.49	151.426	3.03423	0.0360455
253812_at	putative wound-responsive protein	AT4G28240	AT4G28240	FG-SD-sp	FG-SD-gr	6087.47	746.949	3.02676	0.0227217
263852_at	ATNUDT6 (Arabidopsis thaliana Nudix hydrolase homolog 6); ADP-ribose diphosphatase/ NAD or NADH binding / hydrolase	ATNUDT6	AT2G04450	FG-SD-sp	FG-SD-gr	138.581	17.3231	2.99995	0.0419698
266720_s_at	APRR9 (ARABIDOPSIS PSEUDO-RESPONSE REGULATOR 9); protein binding / transcription regulator/ two-component response regulator	APRR9	AT2G46670 /// AT2G46790	FG-SD-sp	FG-SD-gr	1442.71	180.51	2.99863	0.0369721
251503_at	ATMRP14; ATPase, coupled to transmembrane movement of substances	ATMRP14	AT3G59140	FG-SD-sp	FG-SD-gr	221.191	28.5591	2.95327	0.0460838
245594_at	acylamino acid-releasing enzyme	AT4G14570	AT4G14570	FG-SD-sp	FG-SD-gr	170.509	23.0853	2.8848	0.0494321
248505_at	hypothetical protein	AT5G50360	AT5G50360	FG-SD-sp	FG-SD-gr	480.329	65.8536	2.86669	0.022498
261221_at	hypothetical protein	AT1G19960	AT1G19960	FG-SD-sp	FG-SD-gr	247.197	34.1765	2.85459	0.0357062
249011_at	hypothetical protein	AT5G44670	AT5G44670	FG-SD-sp	FG-SD-gr	80.6641	11.4776	2.8131	0.0443581
255481_at	PMS1 (POSTMEIOTIC SEGREGATION 1); ATP binding / mismatched DNA binding	PMS1	AT4G02460	FG-SD-sp	FG-SD-gr	48.1985	6.89865	2.8046	0.0488577
247528_at	MIM (hypersensitive to MMS, irradiation and MMC); ATP binding	MIM	AT5G61460	FG-SD-sp	FG-SD-gr	127.026	18.2361	2.80026	0.0340817
264958_at	hypothetical protein	AT1G76960	AT1G76960	FG-SD-sp	FG-SD-gr	572.126	83.0205	2.78479	0.0541601
251196_at	glutaredoxin-C11	AT3G62950	AT3G62950	FG-SD-sp	FG-SD-gr	426.467	63.9584	2.73723	0.0206843
256789_at	seven in absentia (SINA) domain-containing protein	AT3G13672	AT3G13672	FG-SD-sp	FG-SD-gr	1125.23	181.033	2.6359	0.044788
250381_at	Exostosin family protein	AT5G11610	AT5G11610	FG-SD-sp	FG-SD-gr	345.661	56.2421	2.61963	0.0542765
259805_at	AtRLP7 (Receptor Like Protein 7); kinase/ protein binding	AtRLP7	AT1G47890	FG-SD-sp	FG-SD-gr	359.915	59.9011	2.587	0.0362353
262050_at	tetratricopeptide repeat domain-containing protein	AT1G80130	AT1G80130	FG-SD-sp	FG-SD-gr	1986.87	333.58	2.57439	0.00979815
266462_at	tryptophan-rich sensory protein-like protein	TSPO	AT2G47770	FG-SD-sp	FG-SD-gr	731.476	122.868	2.5737	0.0438376
252366_at	Haloacid dehalogenase-like hydrolase (HAD) superfamily protein	AT3G48420	AT3G48420	FG-SD-sp	FG-SD-gr	228.442	38.5105	2.56851	0.0483753
258935_at	hypothetical protein	AT3G10120	AT3G10120	FG-SD-sp	FG-SD-gr	165.719	28.2798	2.5509	0.0101973
262648_at	[fructose-bisphosphate aldolase]-lysine N-methyltransferase	AT1G14030	AT1G14030	FG-SD-sp	FG-SD-gr	157.012	26.8356	2.54865	0.0156043
260930_at	Ras-related small GTP-binding protein	AT1G02620	AT1G02620	FG-SD-sp	FG-SD-gr	156.979	26.8683	2.54659	0.0540149
267591_at	RTFL8 (ROTUNDIFOLIA LIKE 8)	RTFL8	AT2G39705	FG-SD-sp	FG-SD-gr	750.497	128.815	2.54254	0.0183689
249524_at	alpha/beta-hydrolase-like protein	AT5G38520	AT5G38520	FG-SD-sp	FG-SD-gr	349.809	60.3727	2.5346	0.045847
254746_at	putative auxin-responsive protein	AT4G12980	AT4G12980	FG-SD-sp	FG-SD-gr	146.526	25.3682	2.53006	0.0470562
251593_at	NRPA1; DNA binding / DNA-directed RNA polymerase/ zinc ion binding	NRPA1	AT3G57660	FG-SD-sp	FG-SD-gr	143.44	25.0198	2.5193	0.0212149
254805_at	pEARLI 1; lipid binding	pEARLI 1	AT4G12480	FG-SD-sp	FG-SD-gr	3860.21	674.299	2.51722	0.00267231
266719_at	CCA1 (CIRCADIAN CLOCK ASSOCIATED 1); DNA binding / transcription activator/ transcription factor/ transcription repressor	CCA1	AT2G46830	FG-SD-sp	FG-SD-gr	1985.02	346.87	2.51668	0.0437264
262134_at	AST56; sulfate transmembrane transporter	AST56	AT1G77990	FG-SD-sp	FG-SD-gr	202.692	35.6061	2.50909	0.0528685
256569_at	hypothetical protein	AT3G19550	AT3G19550	FG-SD-sp	FG-SD-gr	353.686	62.1942	2.50762	0.0466277
247741_at	GIL1 (GRAVITROPIC IN THE LIGHT)	GIL1	AT5G58960	FG-SD-sp	FG-SD-gr	186.933	33.1695	2.49459	0.0105574
247232_at	ATATH13; transporter	ATH13	AT5G64940	FG-SD-sp	FG-SD-gr	1034.05	188.562	2.4552	0.0413004
257850_at	SRF4 (STRUBBELIG-RECEPTOR FAMILY 4); ATP binding / kinase/ protein serine/threonine kinase	SRF4	AT3G13065	FG-SD-sp	FG-SD-gr	231.336	43.1052	2.42406	0.0169463
250937_at	hypothetical protein	AT5G03230	AT5G03230	FG-SD-sp	FG-SD-gr	5021.21	950.885	2.40069	0.034478
256343_at	Methylthiotransferase	AT1G72090	AT1G72090	FG-SD-sp	FG-SD-gr	398.516	77.0517	2.37074	0.0530414
249677_at	P-loop containing nucleoside triphosphate hydrolases superfamily protein	AT5G35970	AT5G35970	FG-SD-sp	FG-SD-gr	1237.57	246.154	2.32988	0.0352166
255668_s_at	DNA-binding storekeeper protein-related transcriptional regulator /// DNA-binding storekeeper protein-related transcriptional regulator	AT4G00238 /// AT4G00250	AT4G00238 /// AT4G00250	FG-SD-sp	FG-SD-gr	281.295	56.1538	2.32463	0.00732066
245745_at	putative plastid-lipid-associated protein 12	AT1G51110	AT1G51110	FG-SD-sp	FG-SD-gr	161.059	32.3418	2.31612	0.0435953
263410_at	hypothetical protein	AT2G04039	AT2G04039	FG-SD-sp	FG-SD-gr	533.069	107.577	2.30895	0.0535317
247829_at	protein kinase family protein	AT5G58520	AT5G58520	FG-SD-sp	FG-SD-gr	134.076	27.4113	2.29021	0.0297454
262231_at	phosphate transporter PHO1-1	PHO1;H1	AT1G68740	FG-SD-sp	FG-SD-gr	183.788	37.6885	2.28584	0.0538092
263402_at	MATE efflux family protein	AT2G04050	AT2G04050	FG-SD-sp	FG-SD-gr	581.387	119.243	2.28559	0.0121981
256797_at	DEAD-box ATP-dependent RNA helicase 51	AT3G18600	AT3G18600	FG-SD-sp	FG-SD-gr	339.977	69.8859	2.28236	0.00230868
262288_at	CRR23 ((chlororespiratory reduction 23)	CRR23	AT1G70760	FG-SD-sp	FG-SD-gr	610.923	126.28	2.27436	0.0451267
252929_at	fructose-bisphosphate aldolase 2	FBA2	AT4G38970	FG-SD-sp	FG-SD-gr	6105.58	1265.15	2.27082	0.0474602
257180_at	NOL1/NOP2/sun family protein / antitermination NusB domain-containing protein	AT3G13180	AT3G13180	FG-SD-sp	FG-SD-gr	138.046	29.649	2.21909	0.0185101
266327_at	ATHB-7 (ARABIDOPSIS THALIANA HOMEOBOX 7); transcription activator/ transcription factor	ATHB-7	AT2G46680	FG-SD-sp	FG-SD-gr	5687.9	1225.25	2.21482	0.0531026
246411_at	FAD/NAD(P)-binding oxidoreductase domain-containing protein	AT1G57770	AT1G57770	FG-SD-sp	FG-SD-gr	243.096	52.4029	2.21381	0.0416967
259625_at	GAPB (GLYCERALDEHYDE-3-PHOSPHATE DEHYDROGENASE B SUBUNIT); glyceraldehyde-3-phosphate dehydrogenase (NADP+)/ glyceraldehyde-3-phosphate dehydrogenase	GAPB	AT1G42970	FG-SD-sp	FG-SD-gr	2923.16	640.484	2.19029	0.0506939
260294_at	putative GMP synthase / glutamine amidotransferase	AT1G63660	AT1G63660	FG-SD-sp	FG-SD-gr	452.159	99.2225	2.18809	0.0125045
248969_at	hypothetical protein	AT5G45310	AT5G45310	FG-SD-sp	FG-SD-gr	1277.27	282.042	2.17908	0.0338897
249944_at	anac089 (Arabidopsis NAC domain containing protein 89); transcription factor	anac089	AT5G22290	FG-SD-sp	FG-SD-gr	2227.81	491.94	2.17907	0.0440409
258925_at	protein seedling plastid development 1	AT3G10420	AT3G10420	FG-SD-sp	FG-SD-gr	5846.87	1308.14	2.16015	0.0455308
267168_at	aldo-keto reductase family 4 member C9	AT2G37770	AT2G37770	FG-SD-sp	FG-SD-gr	1132.03	253.678	2.15784	0.0477329
254597_at	protein AtS40-3	AtS40-3	AT4G18980	FG-SD-sp	FG-SD-gr	351.398	79.1951	2.14962	0.0158304
262151_at	putative hydrolase	AT1G52510	AT1G52510	FG-SD-sp	FG-SD-gr	195.867	44.5138	2.13755	0.0345903
251970_at	UGT73D1 (UDP-glucosyl transferase 73D1); UDP-glycosyltransferase/ transferase, transferring hexosyl groups	UGT73D1	AT3G53150	FG-SD-sp	FG-SD-gr	502.786	114.375	2.13618	0.0102131
249120_at	NAD(P)H dehydrogenase 18	NDH18	AT5G43750	FG-SD-sp	FG-SD-gr	155.751	35.518	2.13262	0.0517073
267237_s_at	dihydrodipicolinate reductase 1 /// dihydrodipicolinate reductase 2	AT2G44040 /// AT3G59890	AT2G44040 /// AT3G59890	FG-SD-sp	FG-SD-gr	96.1438	22.2023	2.11449	0.00705344
259766_at	hypothetical protein	AT1G64360	AT1G64360	FG-SD-sp	FG-SD-gr	1061.65	245.949	2.10987	0.0544107
257101_at	AtRLP42 (Receptor Like Protein 42); protein binding	AtRLP42	AT3G25020	FG-SD-sp	FG-SD-gr	145.282	33.7092	2.10765	0.0106361
245330_at	survival protein SurE-like phosphatase/nucleotidase	AT4G14930	AT4G14930	FG-SD-sp	FG-SD-gr	3416.04	806.895	2.08187	0.0454358
248566_s_at	ATFRO7 (FERRIC REDUCTION OXIDASE 7); ferric-chelate reductase/ oxidoreductase	ATFRO7	AT5G49730 /// AT5G49740	FG-SD-sp	FG-SD-gr	1840.55	436.356	2.07656	0.0514766
265929_s_at	UDP-glycosyltransferase family protein /// UDP-glycosyltransferase 72D1	AT2G18560 /// AT2G18570	AT2G18560 /// AT2G18570	FG-SD-sp	FG-SD-gr	106.595	25.4879	2.06426	0.0155127
257099_s_at	AtRLP42 (Receptor Like Protein 42); protein binding	AtRLP42	AT3G24982 /// AT3G25020	FG-SD-sp	FG-SD-gr	76.353	18.4776	2.04691	0.0125031
258983_at	PYRIMIDINE 4	PYD4	AT3G08860	FG-SD-sp	FG-SD-gr	145.075	35.5868	2.02739	0.0349866
263618_at	APC2; ubiquitin protein ligase binding / ubiquitin-protein ligase	APC2	AT2G04660	FG-SD-sp	FG-SD-gr	100.793	24.8401	2.02065	0.0461523
251519_at	GUN4; enzyme binding / tetrapyrrole binding	GUN4	AT3G59400	FG-SD-sp	FG-SD-gr	643.84	158.756	2.01989	0.0473738
264591_at	pentatricopeptide repeat-containing protein	AT2G17670	AT2G17670	FG-SD-sp	FG-SD-gr	195.693	48.2695	2.01941	0.0148231
259133_at	sugar transporter ERD6-like 12	AT3G05400	AT3G05400	FG-SD-sp	FG-SD-gr	136.545	33.7313	2.01722	0.0177902
245761_at	hypothetical protein	AT1G66890	AT1G66890	FG-SD-sp	FG-SD-gr	1373.53	340.858	2.01065	0.0388935
259973_at	superkiller protein 3-like protein	AT1G76630	AT1G76630	FG-SD-sp	FG-SD-gr	153.429	38.1673	2.00717	0.0495867
251885_at	fructose-1,6-bisphosphatase	HCEF1	AT3G54050	FG-SD-sp	FG-SD-gr	1306.08	325.668	2.00377	0.0160603
267032_at	CIPK22 (CBL-INTERACTING PROTEIN KINASE 22); ATP binding / kinase/ protein kinase/ protein serine/threonine kinase/ protein tyrosine kinase	CIPK22	AT2G38490	FG-SD-sp	FG-SD-gr	230.906	58.3147	1.98537	0.0476847
251029_at	mitochondrial glycoprotein family protein	AT5G02050	AT5G02050	FG-SD-sp	FG-SD-gr	185.954	46.9643	1.98531	0.00526526
248563_at	UDP-glycosyltransferase 91C1	AT5G49690	AT5G49690	FG-SD-sp	FG-SD-gr	586.155	148.234	1.9834	0.0189066
249321_at	---	---	AT5G40920	FG-SD-sp	FG-SD-gr	88.5707	22.5256	1.97527	0.0199758
257891_at	RFC3 (REGULATOR OF FATTY-ACID COMPOSITION 3); structural constituent of ribosome	RFC3	AT3G17170	FG-SD-sp	FG-SD-gr	103.504	26.4143	1.9703	0.0151867
245998_at	SUS1 (SUCROSE SYNTHASE 1); UDP-glycosyltransferase/ sucrose synthase	SUS1	AT5G20830	FG-SD-sp	FG-SD-gr	2855.07	729.571	1.9684	0.0446738
254911_at	hypothetical protein	AT4G11100	AT4G11100	FG-SD-sp	FG-SD-gr	87.4328	22.4868	1.9591	0.0566422
258724_at	MYB-like transcription factor	AT3G09600	AT3G09600	FG-SD-sp	FG-SD-gr	94.5831	24.3661	1.95671	0.0255922
258545_at	nucleolar GTP-binding protein NSN1	AT3G07050	AT3G07050	FG-SD-sp	FG-SD-gr	266.503	68.7389	1.95495	0.00475707
254101_at	AMY1 (ALPHA-AMYLASE-LIKE); alpha-amylase	AMY1	AT4G25000	FG-SD-sp	FG-SD-gr	769.867	199.012	1.95175	0.0540449
249710_at	GS2 (GLUTAMINE SYNTHETASE 2); glutamate-ammonia ligase	GS2	AT5G35630	FG-SD-sp	FG-SD-gr	4227.98	1093.32	1.95125	0.0445367
256661_at	protein ribosomal RNA processing 5	AT3G11964	AT3G11964	FG-SD-sp	FG-SD-gr	201.117	52.0749	1.94938	0.0139024
258424_at	hypothetical protein	AT3G16750	AT3G16750	FG-SD-sp	FG-SD-gr	127.733	33.1271	1.94704	0.0421771
252102_at	LTI30 (LOW TEMPERATURE-INDUCED 30)	LTI30	AT3G50970	FG-SD-sp	FG-SD-gr	8110.15	2104.78	1.94606	0.0344839
254642_at	NAD(P)-binding Rossmann-fold superfamily protein	AT4G18810	AT4G18810	FG-SD-sp	FG-SD-gr	153.572	40.0127	1.94038	0.0354183
250286_at	PBS3 (AVRPPHB SUSCEPTIBLE 3)	PBS3	AT5G13320	FG-SD-sp	FG-SD-gr	521.977	136.613	1.93389	0.00627853
256766_at	PCC1 (PATHOGEN AND CIRCADIAN CONTROLLED 1)	PCC1	AT3G22231	FG-SD-sp	FG-SD-gr	3734.66	982.843	1.92594	0.0511692
256676_at	SEX4 (STARCH-EXCESS 4); polysaccharide binding / protein tyrosine/serine/threonine phosphatase	SEX4	AT3G52180	FG-SD-sp	FG-SD-gr	471.006	124.165	1.92348	0.0161476
265109_s_at	CC-NBS-LRR class disease resistance protein /// CC-NBS-LRR class disease resistance protein	AT1G62630 /// AT1G63360	AT1G62630 /// AT1G63360	FG-SD-sp	FG-SD-gr	692.202	182.793	1.92098	0.0390345
249738_at	60S acidic ribosomal family protein	AT5G24510	AT5G24510	FG-SD-sp	FG-SD-gr	163.927	43.4847	1.91448	0.0116299
262094_at	NOP56 (Arabidopsis homolog of nucleolar protein Nop56)	NOP56	AT1G56110	FG-SD-sp	FG-SD-gr	564.017	149.654	1.91411	0.0073444
255341_at	cysteine-rich receptor-like protein kinase 37	CRK37	AT4G04500	FG-SD-sp	FG-SD-gr	220.471	58.5711	1.91233	0.0465762
256299_at	ATEXPA1 (ARABIDOPSIS THALIANA EXPANSIN A1)	ATEXPA1	AT1G69530	FG-SD-sp	FG-SD-gr	127.942	33.991	1.91227	0.0131687
259765_at	hypothetical protein	AT1G64370	AT1G64370	FG-SD-sp	FG-SD-gr	2872.22	763.264	1.91191	0.051384
251740_at	ROC2 (ROTAMASE CYCLOPHILIN 2); cyclosporin A binding / peptidyl-prolyl cis-trans isomerase	ROC2	AT3G56070	FG-SD-sp	FG-SD-gr	556.979	148.288	1.90923	0.0078567
248940_at	replication protein RPA70C	RPA70C	AT5G45400	FG-SD-sp	FG-SD-gr	91.3965	24.4485	1.90239	0.0159402
263495_at	COR15B (COLD REGULATED 15B)	COR15B	AT2G42530	FG-SD-sp	FG-SD-gr	914.107	244.541	1.90228	0.0563854
257045_at	ARC5 (ACCUMULATION AND REPLICATION OF CHLOROPLAST 5); GTP binding / GTPase	ARC5	AT3G19720	FG-SD-sp	FG-SD-gr	52.5174	14.062	1.90099	0.0362777
258929_at	peptidyl-prolyl cis-trans isomerase FKBP16-4	AT3G10060	AT3G10060	FG-SD-sp	FG-SD-gr	315.126	84.467	1.89947	0.0503884
257722_at	protein ASPARTIC PROTEASE IN GUARD CELL 1	AT3G18490	AT3G18490	FG-SD-sp	FG-SD-gr	2283.38	612.468	1.89846	0.0255086
261613_at	ABF1 (ABSCISIC ACID RESPONSIVE ELEMENT-BINDING FACTOR 1); DNA binding / protein binding / transcription activator/ transcription factor	ABF1	AT1G49720	FG-SD-sp	FG-SD-gr	870.476	234.891	1.88981	0.0129917
252888_at	APL3; glucose-1-phosphate adenylyltransferase	APL3	AT4G39210	FG-SD-sp	FG-SD-gr	92.9839	25.1659	1.88551	0.0434891
260904_at	NIMIN1 (NIM1-INTERACTING 1); protein binding	NIMIN1	AT1G02450	FG-SD-sp	FG-SD-gr	105.422	28.6561	1.87927	0.0575577
255719_at	plastidal glycolate/glycerate translocator 1	AT1G32080	AT1G32080	FG-SD-sp	FG-SD-gr	423.433	115.481	1.87448	0.045204
265076_at	CPN60B (CHAPERONIN 60 BETA); ATP binding / protein binding	CPN60B	AT1G55490	FG-SD-sp	FG-SD-gr	997.017	273.625	1.86542	0.0048994
250528_at	U3 ribonucleoprotein (Utp) family protein	AT5G08600	AT5G08600	FG-SD-sp	FG-SD-gr	57.6709	15.8619	1.86227	0.0273131
254959_at	UGE5 (UDP-D-glucose/UDP-D-galactose 4-epimerase 5); UDP-glucose 4-epimerase/ protein dimerization	UGE5	AT4G10955 /// AT4G10960	FG-SD-sp	FG-SD-gr	473.001	130.22	1.86089	0.0533266
255720_at	PRK (PHOSPHORIBULOKINASE); ATP binding / phosphoribulokinase/ protein binding	PRK	AT1G32060	FG-SD-sp	FG-SD-gr	2190.42	603.385	1.86006	0.0533477
250665_at	hypothetical protein	AT5G06980	AT5G06980	FG-SD-sp	FG-SD-gr	3064.3	844.502	1.85938	0.0116938
246917_at	serine-rich protein-like protein	AT5G25280	AT5G25280	FG-SD-sp	FG-SD-gr	4114.86	1134.44	1.85886	0.015787
252289_at	SWAP (Suppressor-of-White-APricot)/surp RNA-binding domain-containing protein	AT3G49130	AT3G49130	FG-SD-sp	FG-SD-gr	1012.94	279.493	1.85767	0.0515397
253394_at	VTE1 (VITAMIN E DEFICIENT 1); tocopherol cyclase	VTE1	AT4G32770	FG-SD-sp	FG-SD-gr	190.063	52.5194	1.85555	0.0391404
255764_at	HCF173 (high chlorophyll fluorescence phenotype 173); binding / catalytic/ transcription repressor	HCF173	AT1G16720	FG-SD-sp	FG-SD-gr	1271.64	353.104	1.84853	0.0445106
251154_at	ATIPT3 (ARABIDOPSIS THALIANA ISOPENTENYLTRANSFERASE 3); ATP binding / tRNA isopentenyltransferase/ transferase, transferring alkyl or aryl (other than methyl) groups	ATIPT3	AT3G63110	FG-SD-sp	FG-SD-gr	191.063	53.0688	1.84811	0.00108337
247585_at	hypothetical protein	AT5G60680	AT5G60680	FG-SD-sp	FG-SD-gr	8039.01	2235.79	1.84623	0.0339266
260149_at	2-oxoglutarate-dependent dioxygenase-related protein	AT1G52810	AT1G52810	FG-SD-sp	FG-SD-gr	64.2404	17.8846	1.84476	0.0479432
265161_at	vacuolar sorting receptor 6	VSR6	AT1G30900	FG-SD-sp	FG-SD-gr	1741.02	485.868	1.84129	0.0126013
253188_at	TMT2 (TONOPLAST MONOSACCHARIDE TRANSPORTER2); carbohydrate transmembrane transporter/ nucleoside transmembrane transporter/ sugar:hydrogen symporter	TMT2	AT4G35300	FG-SD-sp	FG-SD-gr	326.553	91.3485	1.83786	0.0057702
251760_at	mitochondrial glycoprotein family protein	AT3G55605	AT3G55605	FG-SD-sp	FG-SD-gr	120.011	33.5932	1.83692	0.0346709
249136_at	hypothetical protein	AT5G43180	AT5G43180	FG-SD-sp	FG-SD-gr	104.91	29.4014	1.8352	0.0392511
254080_at	FIB2 (FIBRILLARIN 2); snoRNA binding	FIB2	AT4G25630	FG-SD-sp	FG-SD-gr	216.203	60.7146	1.83227	0.00586719
258777_at	hypothetical protein	AT3G11850	AT3G11850	FG-SD-sp	FG-SD-gr	596.708	170.491	1.80733	0.0171418
245392_at	monothiol glutaredoxin-S4	AT4G15680	AT4G15680	FG-SD-sp	FG-SD-gr	1248.34	356.7	1.80723	0.00471339
255053_at	DEAD-box ATP-dependent RNA helicase 39	RH39	AT4G09730	FG-SD-sp	FG-SD-gr	180.41	51.6132	1.80547	0.0203742
255630_at	C2 calcium/lipid-binding plant phosphoribosyltransferase family protein	AT4G00700	AT4G00700	FG-SD-sp	FG-SD-gr	2622.45	750.348	1.80529	0.053521
246566_at	probable peptide/nitrate transporter	AT5G14940	AT5G14940	FG-SD-sp	FG-SD-gr	866.592	248.13	1.80426	0.0456966
248895_at	FLS2 (FLAGELLIN-SENSITIVE 2); ATP binding / kinase/ protein binding / protein serine/threonine kinase/ transmembrane receptor protein serine/threonine kinase	FLS2	AT5G46330	FG-SD-sp	FG-SD-gr	351.847	101.781	1.78948	0.00196996
248773_at	FRA1 (FRAGILE FIBER 1); microtubule motor	FRA1	AT5G47820	FG-SD-sp	FG-SD-gr	175.177	50.7127	1.78839	0.0312768
244973_at	photosystem II protein T	psbT	ATCG00690	FG-SD-sp	FG-SD-gr	796.165	231.91	1.7795	0.0338823
247508_at	ARF2 (AUXIN RESPONSE FACTOR 2); protein binding / transcription factor	ARF2	AT5G62000	FG-SD-sp	FG-SD-gr	664.599	193.794	1.77796	0.0310457
248510_at	---	---	AT5G50315	FG-SD-sp	FG-SD-gr	127.368	37.1656	1.77696	0.0269094
246623_at	ATNUC-L1; nucleic acid binding / nucleotide binding	ATNUC-L1	AT1G48920	FG-SD-sp	FG-SD-gr	2774.28	812.324	1.77198	0.008247
252863_at	MIPS1 (MYO-INOSITOL-1-PHOSTPATE SYNTHASE 1); inositol-3-phosphate synthase	MIPS1	AT4G39800	FG-SD-sp	FG-SD-gr	433.926	127.665	1.76508	0.0178309
263406_at	AIR3; serine-type endopeptidase	AIR3	AT2G04160	FG-SD-sp	FG-SD-gr	781.114	229.83	1.76497	0.000728044
250445_at	aspartyl protease family protein	AT5G10760	AT5G10760	FG-SD-sp	FG-SD-gr	3934.83	1164.39	1.75673	0.00762291
266510_at	SWA1 (SLOW WALKER1); nucleotide binding	SWA1	AT2G47990	FG-SD-sp	FG-SD-gr	186.685	55.3164	1.75483	0.000302094
264185_at	thylakoid lumen protein 18.3	TLP18.3	AT1G54780	FG-SD-sp	FG-SD-gr	1412.33	419.474	1.75143	0.0452793
249672_at	exosome complex exonuclease RRP6L2	AT5G35910	AT5G35910	FG-SD-sp	FG-SD-gr	413.081	122.938	1.7485	0.0122557
253496_at	ATGPX7 (glutathione peroxidase 7); glutathione peroxidase	ATGPX7	AT4G31870	FG-SD-sp	FG-SD-gr	142.176	42.746	1.73381	0.0594526
247696_at	MYB59 (MYB DOMAIN PROTEIN 59); DNA binding / transcription factor	MYB59	AT5G59780	FG-SD-sp	FG-SD-gr	934.882	281.079	1.73381	0.0352979
251372_at	hypothetical protein	AT3G60520	AT3G60520	FG-SD-sp	FG-SD-gr	1149.34	348.991	1.71954	0.00790377
245368_at	photosystem II reaction center PsbP family protein	AT4G15510	AT4G15510	FG-SD-sp	FG-SD-gr	84.4386	25.7151	1.71529	0.0532363
249320_at	TIR-NBS-LRR class disease resistance protein	AT5G40910	AT5G40910	FG-SD-sp	FG-SD-gr	194.739	59.4606	1.71153	0.00481624
251733_at	CCH (COPPER CHAPERONE); copper chaperone	CCH	AT3G56240	FG-SD-sp	FG-SD-gr	6227.52	1917.06	1.69976	0.0502968
256296_at	EXS (ERD1/XPR1/SYG1) family protein	AT1G69480	AT1G69480	FG-SD-sp	FG-SD-gr	1491.69	459.943	1.69742	0.00645206
259385_at	hypothetical protein	AT1G13470	AT1G13470	FG-SD-sp	FG-SD-gr	498.786	154.577	1.6901	0.0428636
254736_at	leucine-rich repeat-containing protein	AT4G13820	AT4G13820	FG-SD-sp	FG-SD-gr	541.56	167.846	1.68998	0.00371816
259344_at	RIF10 (resistant to inhibition with FSM 10); 3'-5'-exoribonuclease/ RNA binding / nucleic acid binding / polyribonucleotide nucleotidyltransferase	RIF10	AT3G03710	FG-SD-sp	FG-SD-gr	306.825	95.1207	1.68958	0.012209
251291_at	SAUR-like auxin-responsive protein	AT3G61900	AT3G61900	FG-SD-sp	FG-SD-gr	495.416	153.91	1.68655	0.0484776
248036_at	nucleolar protein, putative	OLI2	AT5G55920	FG-SD-sp	FG-SD-gr	255.798	79.7367	1.68169	0.0121217
246036_at	AtAGAL2 (Arabidopsis thaliana ALPHA-GALACTOSIDASE 2); alpha-galactosidase/ catalytic/ hydrolase, hydrolyzing O-glycosyl compounds	AtAGAL2	AT5G08370	FG-SD-sp	FG-SD-gr	424.103	132.661	1.67667	0.0100888
247908_at	GS1; catalytic/ hydrolase	GS1	AT5G57440	FG-SD-sp	FG-SD-gr	134.928	42.2079	1.67661	0.0498366
252429_at	CDF3 (CYCLING DOF FACTOR 3); DNA binding / protein binding / transcription factor	CDF3	AT3G47500	FG-SD-sp	FG-SD-gr	1740.11	544.772	1.67545	0.0338853
258687_at	ubiquitin-like superfamily protein	AT3G07860	AT3G07860	FG-SD-sp	FG-SD-gr	179.112	56.1262	1.67412	0.00680927
247709_at	Major facilitator superfamily protein	AT5G59250	AT5G59250	FG-SD-sp	FG-SD-gr	291.635	91.5109	1.67215	0.0384458
267578_at	hypothetical protein	AT2G30695	AT2G30695	FG-SD-sp	FG-SD-gr	221.249	69.7275	1.66587	0.00169006
263760_at	SULA; binding / catalytic/ coenzyme binding	SULA	AT2G21280	FG-SD-sp	FG-SD-gr	532.468	168.014	1.66411	0.0501674
260157_at	ribosomal RNA processing Brix domain protein	AT1G52930	AT1G52930	FG-SD-sp	FG-SD-gr	776.742	245.539	1.66149	0.0293091
262128_at	Late embryogenesis abundant protein (LEA) family protein	AT1G52690	AT1G52690	FG-SD-sp	FG-SD-gr	173.814	54.9832	1.66048	0.00542292
250538_at	STRS2 (STRESS RESPONSE SUPPRESSOR 2); ATP-dependent helicase/ RNA binding	STRS2	AT5G08620	FG-SD-sp	FG-SD-gr	553.932	175.399	1.65907	0.0217034
253175_at	MSI3 (MULTICOPY SUPPRESSOR OF IRA1 3); protein binding	MSI3	AT4G35050	FG-SD-sp	FG-SD-gr	126.894	40.2334	1.65716	0.0234165
247314_at	SAL2; 3'(2'),5'-bisphosphate nucleotidase/ inositol or phosphatidylinositol phosphatase	SAL2	AT5G64000	FG-SD-sp	FG-SD-gr	1331.5	422.311	1.65667	0.00826062
247241_at	hypothetical protein	AT5G64680	AT5G64680	FG-SD-sp	FG-SD-gr	367.686	116.79	1.65455	0.04009
259227_at	3'-5'-exoribonuclease family protein	AT3G07750	AT3G07750	FG-SD-sp	FG-SD-gr	168.057	53.3819	1.65453	0.00170829
258723_at	MYB-like transcription factor	AT3G09600	AT3G09600	FG-SD-sp	FG-SD-gr	192.483	61.1768	1.65367	0.00197007
264913_at	pentatricopeptide repeat-containing protein	AT1G60770	AT1G60770	FG-SD-sp	FG-SD-gr	127.282	40.5136	1.65155	0.0468186
260349_at	transducin/WD-40 repeat-containing protein	AT1G69400	AT1G69400	FG-SD-sp	FG-SD-gr	130.249	41.6111	1.64623	0.0294972
255832_at	hypothetical protein	AT2G33360	AT2G33360	FG-SD-sp	FG-SD-gr	136.734	43.6851	1.64616	0.0126895
254496_at	ATAAH (Arabidopsis thaliana Allantoate Amidohydrolase); allantoate deiminase/ metallopeptidase	ATAAH	AT4G20070	FG-SD-sp	FG-SD-gr	1006.66	322.084	1.64407	0.0245081
254638_at	Rho termination factor	AT4G18740	AT4G18740	FG-SD-sp	FG-SD-gr	191.536	61.511	1.6387	0.00979473
253980_at	Sucrase/ferredoxin-like protein	AT4G26620	AT4G26620	FG-SD-sp	FG-SD-gr	815.61	262.456	1.63581	0.0375401
250992_at	ATEXPA9 (ARABIDOPSIS THALIANA EXPANSIN A9)	ATEXPA9	AT5G02260	FG-SD-sp	FG-SD-gr	228.815	73.6653	1.63512	0.00831301
253737_at	cupin domain-containing protein	AT4G28703	AT4G28703	FG-SD-sp	FG-SD-gr	1012	326.343	1.63275	0.0315924
261377_at	hypothetical protein	AT1G18850	AT1G18850	FG-SD-sp	FG-SD-gr	421.85	136.254	1.63044	0.0542667
261576_at	nodulin MtN21-like transporter family protein	AT1G01070	AT1G01070	FG-SD-sp	FG-SD-gr	567.047	183.158	1.63038	0.0547066
256746_at	alpha-glucan phosphorylase 1	AT3G29320	AT3G29320	FG-SD-sp	FG-SD-gr	224.368	72.586	1.62811	0.00957118
247383_at	Leucine-rich repeat protein kinase family protein	AT5G63410	AT5G63410	FG-SD-sp	FG-SD-gr	488.875	158.256	1.62721	0.0394967
261958_at	glutaredoxin-like protein	AT1G64500	AT1G64500	FG-SD-sp	FG-SD-gr	86.3713	27.9797	1.62617	0.0428783
246308_at	G4; chlorophyll synthetase	G4	AT3G51820	FG-SD-sp	FG-SD-gr	783.607	253.857	1.62611	0.0159945
263383_at	putative serine/threonine protein kinase	AT2G40120	AT2G40120	FG-SD-sp	FG-SD-gr	102.018	33.0902	1.62434	0.0359819
255749_at	STRS1 (STRESS RESPONSE SUPPRESSOR 1); ATP binding / ATP-dependent helicase/ helicase/ nucleic acid binding	STRS1	AT1G31970	FG-SD-sp	FG-SD-gr	1273.23	413.326	1.62314	0.0142276
256890_at	GRP4 (GLYCINE-RICH RNA-BINDING PROTEIN 4); RNA binding / double-stranded DNA binding / single-stranded DNA binding	GRP4	AT3G23830	FG-SD-sp	FG-SD-gr	178.651	58.152	1.61924	0.0088376
260236_at	geranylgeranyl diphosphate reductase	AT1G74470	AT1G74470	FG-SD-sp	FG-SD-gr	4784.83	1558.06	1.61872	0.0453879
253854_at	CCT motif family protein	AT4G27900	AT4G27900	FG-SD-sp	FG-SD-gr	310.913	101.832	1.61032	0.0107752
260282_at	EMB2753 (EMBRYO DEFECTIVE 2753); binding	EMB2753	AT1G80410	FG-SD-sp	FG-SD-gr	758.772	249.082	1.60704	0.0369883
247853_at	PHOT2 (PHOTOTROPIN 2); FMN binding / blue light photoreceptor/ kinase/ protein serine/threonine kinase	PHOT2	AT5G58140	FG-SD-sp	FG-SD-gr	184.98	60.7243	1.60702	0.0513018
250790_at	nucleoprotein-like protein	AT5G05640	AT5G05640	FG-SD-sp	FG-SD-gr	406.71	134.115	1.60053	0.0135951
248242_at	pyridoxal reductase	AT5G53580	AT5G53580	FG-SD-sp	FG-SD-gr	368.224	121.519	1.5994	0.00776911
265699_at	probable carboxylesterase 7	AT2G03550	AT2G03550	FG-SD-sp	FG-SD-gr	323.151	106.676	1.59897	0.00816913
259942_at	ATWHY2 (A. THALIANA WHIRLY 2); DNA binding	ATWHY2	AT1G71260	FG-SD-sp	FG-SD-gr	340.847	112.522	1.59892	0.01454
245007_at	PSI P700 apoprotein A1	psaA	ATCG00350	FG-SD-sp	FG-SD-gr	1568.81	518.861	1.59625	0.0397954
265182_at	alkenal/one oxidoreductase	AT1G23740	AT1G23740	FG-SD-sp	FG-SD-gr	973.344	322.239	1.59482	0.0532367
265547_at	cytokinin riboside 5'-monophosphate phosphoribohydrolase LOG1	LOG1	AT2G28305	FG-SD-sp	FG-SD-gr	1677.3	555.308	1.59478	0.0361569
251869_at	hypothetical protein	AT3G54500	AT3G54500	FG-SD-sp	FG-SD-gr	1657.44	549.181	1.5936	0.0143612
266288_s_at	APUM1 (Arabidopsis Pumilio 1); RNA binding / binding	APUM1	AT2G29140 /// AT2G29200	FG-SD-sp	FG-SD-gr	427.109	141.711	1.59166	0.0305858
252480_at	MBD5 (METHYL-CPG-BINDING DOMAIN PROTEIN 5); DNA binding / methyl-CpG binding	MBD5	AT3G46580	FG-SD-sp	FG-SD-gr	114.274	37.9287	1.59114	0.0498607
248828_at	chlorophyll A-B binding family protein	AT5G47110	AT5G47110	FG-SD-sp	FG-SD-gr	2765.53	918.301	1.59052	0.0541255
254142_at	DHHC-type zinc finger family protein	AT4G24630	AT4G24630	FG-SD-sp	FG-SD-gr	139.78	46.5796	1.58539	0.0111708
245052_at	Probable pectinesterase/pectinesterase inhibitor 12	AT2G26440	AT2G26440	FG-SD-sp	FG-SD-gr	380.276	127.118	1.58088	0.0534266
262875_at	G-TMT (GAMMA-TOCOPHEROL METHYLTRANSFERASE); tocopherol O-methyltransferase	G-TMT	AT1G64970	FG-SD-sp	FG-SD-gr	513.25	171.881	1.57825	0.0340021
261130_at	PRMT10; [myelin basic protein]-arginine N-methyltransferase/ histone-arginine N-methyltransferase/ methyltransferase/ protein-arginine omega-N asymmetric methyltransferase/ protein-arginine omega-N monomethyltransferase	PRMT10	AT1G04870	FG-SD-sp	FG-SD-gr	1399.94	469.073	1.57749	0.0267023
252917_at	B-box type zinc finger-containing protein	AT4G38960	AT4G38960	FG-SD-sp	FG-SD-gr	331.215	111.042	1.57666	0.0138144
264148_at	ANAC003 (Arabidopsis NAC domain containing protein 3); transcription factor	ANAC003	AT1G02220	FG-SD-sp	FG-SD-gr	973.447	326.517	1.57594	0.0421814
245460_at	RLM3 (RESISTANCE TO LEPTOSPHAERIA MACULANS 3); ATP binding	RLM3	AT4G16990	FG-SD-sp	FG-SD-gr	528.644	177.805	1.572	0.0470481
253695_at	PRMT11 (ARGININE METHYLTRANSFERASE 11); protein-arginine N-methyltransferase	PRMT11	AT4G29510	FG-SD-sp	FG-SD-gr	501.261	169.851	1.56129	0.0149913
250517_at	scpl35 (serine carboxypeptidase-like 35); serine-type carboxypeptidase	scpl35	AT5G08260	FG-SD-sp	FG-SD-gr	315.814	107.308	1.55732	0.0108469
259835_at	TRZ3 (TRNASE Z 3); 3'-tRNA processing endoribonuclease/ catalytic	TRZ3	AT1G52160	FG-SD-sp	FG-SD-gr	220.932	75.0907	1.55689	0.0499419
244977_at	cytochrome b6/f complex subunit 4	petD	ATCG00730	FG-SD-sp	FG-SD-gr	435.371	148.046	1.5562	0.0258952
254943_at	hypothetical protein	AT4G10890	AT4G10890	FG-SD-sp	FG-SD-gr	124.323	42.2818	1.55598	0.039438
253218_at	SLP2; serine-type peptidase	SLP2	AT4G34980	FG-SD-sp	FG-SD-gr	287.455	97.9328	1.55348	0.00562745
257658_at	RNA-binding KH domain-containing protein	AT3G13230	AT3G13230	FG-SD-sp	FG-SD-gr	605.83	206.891	1.55004	0.00531901
267406_at	MEE22 (MATERNAL EFFECT EMBRYO ARREST 22)	MEE22	AT2G34780	FG-SD-sp	FG-SD-gr	113.317	38.7024	1.54987	0.0395241
266831_at	SQE2 (squalene epoxidase 2); FAD binding / oxidoreductase/ squalene monooxygenase	SQE2	AT2G22830	FG-SD-sp	FG-SD-gr	72.8418	24.914	1.54781	0.0493613
258546_at	emb1974 (embryo defective 1974)	emb1974	AT3G07060	FG-SD-sp	FG-SD-gr	53.3557	18.2695	1.54621	0.00860068
261299_at	vacuolar protein sorting-associated protein 26	AT1G48550	AT1G48550	FG-SD-sp	FG-SD-gr	1061.3	364.235	1.54289	0.0350978
256002_at	CARB (CARBAMOYL PHOSPHATE SYNTHETASE B); ATP binding / carbamoyl-phosphate synthase/ catalytic	CARB	AT1G29900	FG-SD-sp	FG-SD-gr	634.265	217.745	1.54245	0.009058
261947_at	ubiquitin-like protein	AT1G64470	AT1G64470	FG-SD-sp	FG-SD-gr	295.714	101.666	1.54036	0.0140524
265467_at	putative receptor protein kinase	AT2G37050	AT2G37050	FG-SD-sp	FG-SD-gr	238.142	81.9452	1.53909	0.0528088
248530_at	hypothetical protein	AT5G49945	AT5G49945	FG-SD-sp	FG-SD-gr	265.058	91.3103	1.53746	0.0542717
246284_at	BES1/BZR1-like protein 2	BEH2	AT4G36780	FG-SD-sp	FG-SD-gr	736.933	253.921	1.53715	0.0438232
258333_at	MFP1 (MAR BINDING FILAMENT-LIKE PROTEIN 1); DNA binding	MFP1	AT3G16000	FG-SD-sp	FG-SD-gr	243.683	84.1199	1.53449	0.00780551
247401_at	DXR (1-DEOXY-D-XYLULOSE 5-PHOSPHATE REDUCTOISOMERASE); 1-deoxy-D-xylulose-5-phosphate reductoisomerase	DXR	AT5G62790	FG-SD-sp	FG-SD-gr	952.208	328.899	1.53363	0.0545981
259347_at	H/ACA ribonucleoprotein complex, subunit Gar1/Naf1 protein	AT3G03920	AT3G03920	FG-SD-sp	FG-SD-gr	1128.15	390.283	1.53137	0.014067
252229_at	hypothetical protein	AT3G49890	AT3G49890	FG-SD-sp	FG-SD-gr	95.9329	33.2133	1.53027	0.00774393
253085_s_at	Histidine kinase-, DNA gyrase B-, and HSP90-like ATPase family protein	AT4G36280	AT4G36280	FG-SD-sp	FG-SD-gr	103.096	35.7222	1.52909	0.0339542
251625_at	BGL2 (BETA-1,3-GLUCANASE 2); cellulase/ glucan 1,3-beta-glucosidase/ hydrolase, hydrolyzing O-glycosyl compounds	BGL2	AT3G57260	FG-SD-sp	FG-SD-gr	7295.61	2529.33	1.52827	0.054517
255562_at	MSH6 (MUTS HOMOLOG 6); damaged DNA binding	MSH6	AT4G02070	FG-SD-sp	FG-SD-gr	147.741	51.2696	1.52689	0.0230144
252549_at	cysteine-rich receptor-like protein kinase 4	CRK4	AT3G45860	FG-SD-sp	FG-SD-gr	2743.93	953.885	1.52436	0.0457915
264261_at	NAS3 (NICOTIANAMINE SYNTHASE 3); nicotianamine synthase	NAS3	AT1G09240	FG-SD-sp	FG-SD-gr	3044.01	1059.2	1.523	0.0340508
262507_at	G-type lectin S-receptor-like serine/threonine-protein kinase	AT1G11330	AT1G11330	FG-SD-sp	FG-SD-gr	210.696	73.3979	1.52135	0.0328048
258505_at	U3snoRNP10 and NUC211 domain-containing protein	AT3G06530	AT3G06530	FG-SD-sp	FG-SD-gr	126.621	44.1438	1.52023	0.0070944
251146_at	CCD1 (CAROTENOID CLEAVAGE DIOXYGENASE 1); 9-cis-epoxycarotenoid dioxygenase	CCD1	AT3G63520	FG-SD-sp	FG-SD-gr	3891.14	1357.87	1.51885	0.0531572
246480_at	TCP-1/cpn60 chaperonin family protein	AT5G16070	AT5G16070	FG-SD-sp	FG-SD-gr	918.851	320.884	1.51778	0.0304309
259914_at	NAD(P)-binding Rossmann-fold superfamily protein	AT1G72640	AT1G72640	FG-SD-sp	FG-SD-gr	87.8032	30.6873	1.51663	0.044361
249887_at	hypothetical protein	AT5G22310	AT5G22310	FG-SD-sp	FG-SD-gr	139.041	48.6108	1.51616	0.00468386
260966_at	RPS5 (RESISTANT TO P. SYRINGAE 5); nucleotide binding	RPS5	AT1G12220	FG-SD-sp	FG-SD-gr	416.667	145.82	1.5147	0.0410856
251221_at	drought responsive ATP-binding motif containing protein	AT3G62550	AT3G62550	FG-SD-sp	FG-SD-gr	15735.1	5510.66	1.51369	0.00235884
261948_at	hypothetical protein	AT1G64680	AT1G64680	FG-SD-sp	FG-SD-gr	298.972	104.954	1.51025	0.00662727
246122_at	PHT4;5; inorganic phosphate transmembrane transporter	PHT4;5	AT5G20380	FG-SD-sp	FG-SD-gr	969.065	340.826	1.50756	0.0370852
251667_at	NAP57 (Arabidopsis thaliana homologue of NAP57); pseudouridine synthase	NAP57	AT3G57150	FG-SD-sp	FG-SD-gr	553.155	194.747	1.50608	0.000844503
248198_at	transducin/WD40 domain-containing protein	AT5G54200	AT5G54200	FG-SD-sp	FG-SD-gr	106.982	37.7452	1.503	0.0503067
248311_at	BETA-OHASE 2 (BETA-CAROTENE HYDROXYLASE 2); carotene beta-ring hydroxylase	BETA-OHASE 2	AT5G52570	FG-SD-sp	FG-SD-gr	941.63	332.399	1.50224	0.0314624
260804_at	VQ motif-containing protein	AT1G78410	AT1G78410	FG-SD-sp	FG-SD-gr	1474.39	521.231	1.50012	0.0531974
262574_at	hypothetical protein	AT1G15230	AT1G15230	FG-SD-sp	FG-SD-gr	798.811	282.401	1.50011	0.019726
255546_at	cysteine/histidine-rich C1 domain-containing protein	AT4G01910	AT4G01910	FG-SD-sp	FG-SD-gr	561.46	198.541	1.49974	0.0471148
251190_at	ATL5 (ATL5); protein binding / zinc ion binding	ATL5	AT3G62690	FG-SD-sp	FG-SD-gr	231.973	82.2433	1.49599	0.00556226
257974_at	leucine-rich repeat-containing protein	AT3G20820	AT3G20820	FG-SD-sp	FG-SD-gr	410.271	145.472	1.49583	0.0112724
261048_at	UGT72B3 (UDP-GLUCOSYL TRANSFERASE 72B3); UDP-glycosyltransferase/ quercetin 3-O-glucosyltransferase/ transferase, transferring glycosyl groups	UGT72B3	AT1G01420	FG-SD-sp	FG-SD-gr	152.804	54.2209	1.49476	0.035175
266076_at	DEAD-box ATP-dependent RNA helicase 17	AT2G40700	AT2G40700	FG-SD-sp	FG-SD-gr	164.207	58.3339	1.49311	0.0539346
262263_at	PIN3 (PIN-FORMED 3); auxin:hydrogen symporter/ transporter	PIN3	AT1G70940	FG-SD-sp	FG-SD-gr	222.538	79.0594	1.49304	0.0119435
245933_at	VPS9B	VPS9B	AT5G09320	FG-SD-sp	FG-SD-gr	212.124	75.9425	1.48193	0.0068794
247903_at	hypothetical protein	AT5G57340	AT5G57340	FG-SD-sp	FG-SD-gr	650.466	233.035	1.48092	0.0121065
251282_at	CRF6 (CYTOKININ RESPONSE FACTOR 6); DNA binding / transcription factor	CRF6	AT3G61630	FG-SD-sp	FG-SD-gr	1301.37	466.369	1.48049	0.00960095
250884_at	CPSRP54 (CHLOROPLAST SIGNAL RECOGNITION PARTICLE 54 KDA SUBUNIT); 7S RNA binding / GTP binding / mRNA binding / signal sequence binding	CPSRP54	AT5G03940	FG-SD-sp	FG-SD-gr	838.741	300.587	1.48044	0.0388424
251157_at	CSP41A (CHLOROPLAST STEM-LOOP BINDING PROTEIN OF 41 KDA); mRNA binding / poly(U) binding	CSP41A	AT3G63140	FG-SD-sp	FG-SD-gr	392.366	141.031	1.47618	0.0503678
253550_at	SIP3 (SOS3-INTERACTING PROTEIN 3); ATP binding / kinase/ protein kinase/ protein serine/threonine kinase	SIP3	AT4G30960	FG-SD-sp	FG-SD-gr	8731.47	3142.26	1.47442	0.0291821
262704_at	ASL9 (ASYMMETRIC LEAVES 2 LIKE 9)	ASL9	AT1G16530	FG-SD-sp	FG-SD-gr	174.56	62.8234	1.47435	0.0239093
255127_at	nodulin MtN21 /EamA-like transporter family protein	AT4G08300	AT4G08300	FG-SD-sp	FG-SD-gr	334.568	121.226	1.46459	0.0612056
262584_at	periodic tryptophan protein 2	PWP2	AT1G15440	FG-SD-sp	FG-SD-gr	176.31	63.909	1.46402	0.0102714
246199_at	hydrolase, alpha/beta fold family protein	AT4G36530	AT4G36530	FG-SD-sp	FG-SD-gr	227.821	82.7276	1.46146	0.0516134
264879_at	hypothetical protein	AT1G61260	AT1G61260	FG-SD-sp	FG-SD-gr	278.932	101.558	1.4576	0.0222318
247601_at	OBP4; DNA binding / transcription factor	OBP4	AT5G60850	FG-SD-sp	FG-SD-gr	4052.76	1476.44	1.45678	0.0213294
247183_at	hypothetical protein	AT5G65440	AT5G65440	FG-SD-sp	FG-SD-gr	133.022	48.4825	1.45613	0.0621428
261810_at	ATLIG1 (ARABIDOPSIS THALIANA DNA LIGASE 1); ATP binding / DNA binding / DNA ligase (ATP)	ATLIG1	AT1G08130	FG-SD-sp	FG-SD-gr	111.317	40.5894	1.45551	0.0104064
251305_at	peptidyl-prolyl cis-trans isomerase, chloroplast / cyclophilin / rotamase / cyclosporin A-binding protein (ROC4)	ROC4	AT3G62030	FG-SD-sp	FG-SD-gr	1889.17	689.093	1.45498	0.0343433
262970_at	protein disulfide-isomerase LQY1	AT1G75690	AT1G75690	FG-SD-sp	FG-SD-gr	404.398	147.712	1.45299	0.00885252
251916_at	probable peptide/nitrate transporter	AT3G53960	AT3G53960	FG-SD-sp	FG-SD-gr	1900.29	694.218	1.45276	0.0277387
247274_at	chaperone DnaJ-domain containing protein	AT5G64360	AT5G64360	FG-SD-sp	FG-SD-gr	167.398	61.2556	1.45037	0.032938
253101_at	CYP91A2 (CYTOCHROME P450 MONOOXYGENASE 91A2); electron carrier/ heme binding / iron ion binding / monooxygenase/ oxygen binding	CYP91A2	AT4G37430	FG-SD-sp	FG-SD-gr	2476.77	907.083	1.44915	0.0096489
265119_at	FMO GS-OX4 (FLAVIN-MONOOXYGENASE GLUCOSINOLATE S-OXYGENASE 4); 4-methylthiopropyl glucosinolate S-oxygenase/ 8-methylthiopropyl glucosinolate S-oxygenase/ flavin-containing monooxygenase/ monooxygenase	FMO GS-OX4	AT1G62570	FG-SD-sp	FG-SD-gr	1489.94	545.913	1.44851	0.0632048
246889_at	B3 domain-containing protein	AT5G25470	AT5G25470	FG-SD-sp	FG-SD-gr	115.683	42.409	1.44773	0.019657
265698_at	hypothetical protein	AT2G32160	AT2G32160	FG-SD-sp	FG-SD-gr	3060.31	1122.16	1.44739	0.0334924
252468_at	PHS2 (ALPHA-GLUCAN PHOSPHORYLASE 2); phosphorylase/ transferase, transferring glycosyl groups	PHS2	AT3G46970	FG-SD-sp	FG-SD-gr	520.163	190.778	1.44707	0.00622278
245094_at	DPE2 (DISPROPORTIONATING ENZYME 2); 4-alpha-glucanotransferase/ heteroglycan binding	DPE2	AT2G40840	FG-SD-sp	FG-SD-gr	518.061	190.09	1.44644	0.0358772
248419_at	EXL3 (EXORDIUM LIKE 3)	EXL3	AT5G51550	FG-SD-sp	FG-SD-gr	255.817	94.0229	1.44403	0.00695849
254271_at	cysteine-rich receptor-like protein kinase 7	CRK7	AT4G23150	FG-SD-sp	FG-SD-gr	921.113	338.578	1.44389	0.0359998
247555_at	ECT3	ECT3	AT5G61020	FG-SD-sp	FG-SD-gr	1995.18	733.85	1.44296	0.00672428
254076_at	peptidyl-prolyl cis-trans isomerase FKBP53	FKBP53	AT4G25340	FG-SD-sp	FG-SD-gr	247.867	91.4329	1.43878	0.00667894
265345_at	C3HC4-type RING finger domain-containing protein	AT2G22680	AT2G22680	FG-SD-sp	FG-SD-gr	85.1175	31.3986	1.43876	0.0175781
258316_at	putative rRNA-processing protein EBP2-like protein	AT3G22660	AT3G22660	FG-SD-sp	FG-SD-gr	421.128	155.363	1.43862	0.0110489
258607_at	TRXF1 (THIOREDOXIN F-TYPE 1); enzyme activator	TRXF1	AT3G02730	FG-SD-sp	FG-SD-gr	517.727	191.042	1.4383	0.0440135
255035_at	gamma-tubulin complex protein GIP1a	GIP1	AT4G09550	FG-SD-sp	FG-SD-gr	312.787	115.525	1.43697	0.0127946
259491_at	LHCB6 (LIGHT HARVESTING COMPLEX PSII SUBUNIT 6); chlorophyll binding	LHCB6	AT1G15820	FG-SD-sp	FG-SD-gr	2094.46	773.879	1.43639	0.0438953
248191_at	calcium-binding endonuclease/exonuclease/phosphatase family protein	AT5G54130	AT5G54130	FG-SD-sp	FG-SD-gr	175.04	64.7598	1.43451	0.0139475
262448_at	WD40 domain-containing protein	AT1G49450	AT1G49450	FG-SD-sp	FG-SD-gr	300.326	111.329	1.4317	0.030012
249315_at	RNA-binding protein NOB1	AT5G41190	AT5G41190	FG-SD-sp	FG-SD-gr	468.327	173.854	1.42964	0.000779943
267095_at	FAC1 (EMBRYONIC FACTOR1); AMP deaminase	FAC1	AT2G38280	FG-SD-sp	FG-SD-gr	620.918	230.804	1.42774	0.000536682
264069_at	CPN60A (CHAPERONIN-60ALPHA); ATP binding / protein binding	CPN60A	AT2G28000	FG-SD-sp	FG-SD-gr	544.929	202.669	1.42694	0.00527048
256681_at	SPP2 (SUCROSE-6F-PHOSPHATE PHOSPHOHYDROLASE 2); catalytic/ magnesium ion binding / phosphatase/ sucrose-phosphatase	SPP2	AT3G52340	FG-SD-sp	FG-SD-gr	956.846	356.112	1.42596	0.0104377
250418_at	transducin/WD40 domain-containing protein	AT5G11240	AT5G11240	FG-SD-sp	FG-SD-gr	157.15	58.523	1.42507	0.0132399
258860_at	KUP3 (K+ UPTAKE TRANSPORTER 3); potassium ion transmembrane transporter	KUP3	AT3G02050	FG-SD-sp	FG-SD-gr	214.476	79.9084	1.4244	0.022051
262773_at	LINC2 (LITTLE NUCLEI2)	LINC2	AT1G13220	FG-SD-sp	FG-SD-gr	148.567	55.3629	1.42412	0.000860756
267430_at	EDA3 (embryo sac development arrest 3); heat shock protein binding / unfolded protein binding	EDA3	AT2G34860	FG-SD-sp	FG-SD-gr	1670.73	623.584	1.42182	0.0292172
258300_at	ckl10 (Casein Kinase I-like 10); ATP binding / kinase/ protein kinase/ protein serine/threonine kinase	ckl10	AT3G23340	FG-SD-sp	FG-SD-gr	99.0931	37.0455	1.41949	0.026102
264191_at	sugar transporter ERD6-like 5	AT1G54730	AT1G54730	FG-SD-sp	FG-SD-gr	264.696	99.1725	1.41632	0.0470905
248016_at	FBD-associated F-box protein	AT5G56380	AT5G56380	FG-SD-sp	FG-SD-gr	462.898	173.687	1.4142	0.00786072
266990_at	ATATH8; transporter	ATATH8	AT2G39190	FG-SD-sp	FG-SD-gr	155.753	58.5705	1.41101	0.00426237
259541_at	protein ALTERED SEED GERMINATION 5	AT1G20650	AT1G20650	FG-SD-sp	FG-SD-gr	806.58	303.876	1.40834	0.0234222
262926_s_at	ARK1 (A. THALIANA RECEPTOR KINASE 1); kinase/ protein kinase/ protein serine/threonine kinase/ transmembrane receptor protein kinase	ARK1	AT1G65790 /// AT1G65800	FG-SD-sp	FG-SD-gr	1101.55	415.048	1.40819	0.0498546
246031_at	LA RNA-binding protein	AT5G21160	AT5G21160	FG-SD-sp	FG-SD-gr	920.553	347.532	1.40535	0.016126
253777_at	WD repeat and SOF domain-containing protein 1	AT4G28450	AT4G28450	FG-SD-sp	FG-SD-gr	291.45	110.046	1.40514	0.0126634
260235_at	NRP1 (NAP1-RELATED PROTEIN 1); DNA binding / chromatin binding / histone binding	NRP1	AT1G74560	FG-SD-sp	FG-SD-gr	639.32	241.508	1.40447	0.00729576
260167_at	hypothetical protein	AT1G71970	AT1G71970	FG-SD-sp	FG-SD-gr	1019.62	385.475	1.40332	0.0353853
266817_at	HUB1 (HISTONE MONO-UBIQUITINATION 1); protein binding / protein homodimerization/ ubiquitin-protein ligase/ zinc ion binding	HUB1	AT2G44950	FG-SD-sp	FG-SD-gr	62.9665	23.8214	1.40233	0.06206
258977_s_at	AK3 (ASPARTATE KINASE 3); aspartate kinase	AK3	AT3G02020 /// AT5G14060	FG-SD-sp	FG-SD-gr	413.822	156.871	1.39943	0.0477515
266806_at	splicing factor 3b-like protein /// PHD finger-like domain-containing protein 5A	AT1G07170 /// AT2G30000	AT2G30000	FG-SD-sp	FG-SD-gr	1048.81	397.622	1.39928	0.0335751
251262_at	SNF7-like protein	AT3G62080	AT3G62080	FG-SD-sp	FG-SD-gr	196.188	74.5355	1.39624	0.0254769
257625_at	CYP71B24; electron carrier/ heme binding / iron ion binding / monooxygenase/ oxygen binding	CYP71B24	AT3G26230	FG-SD-sp	FG-SD-gr	1164.28	442.366	1.39613	0.00761176
262526_at	SPS2 (Solanesyl diphosphate synthase 2); trans-octaprenyltranstransferase	SPS2	AT1G17050	FG-SD-sp	FG-SD-gr	380.894	144.921	1.39412	0.0517027
259937_s_at	ATNAP5; ATPase, coupled to transmembrane movement of substances / transporter	ATNAP5	AT1G71330 /// AT3G13080	FG-SD-sp	FG-SD-gr	297.055	113.096	1.39319	0.0316753
258396_at	ribosomal RNA processing brix domain-containing protein	AT3G15460	AT3G15460	FG-SD-sp	FG-SD-gr	186.029	70.9629	1.39039	0.00512404
263676_at	CRB (CHLOROPLAST RNA BINDING); binding / catalytic/ coenzyme binding	CRB	AT1G09340	FG-SD-sp	FG-SD-gr	1922.46	733.816	1.38947	0.0269849
248336_at	hypothetical protein	AT5G52420	AT5G52420	FG-SD-sp	FG-SD-gr	689.838	263.424	1.38887	0.0471349
246464_at	zinc-binding dehydrogenase family protein	AT5G16980	AT5G16980	FG-SD-sp	FG-SD-gr	467.798	178.655	1.3887	0.0510627
255543_at	tolB-related protein	AT4G01870	AT4G01870	FG-SD-sp	FG-SD-gr	11672.2	4459.79	1.38803	0.0515375
255020_at	tRNA synthetase class I (I, L, M and V) family protein	AT4G10320	AT4G10320	FG-SD-sp	FG-SD-gr	1665.11	636.236	1.38798	0.0490252
255852_at	SVL2 (SHV3-LIKE 2); glycerophosphodiester phosphodiesterase/ kinase	SVL2	AT1G66970	FG-SD-sp	FG-SD-gr	2787.07	1065.73	1.38691	0.0121187
264450_s_at	SNL6 (SIN3-LIKE 6)	SNL6	AT1G10250 /// AT1G10450	FG-SD-sp	FG-SD-gr	309.903	118.511	1.38679	0.0265914
257125_at	ATTCP-1; ATP binding / protein binding / unfolded protein binding	ATTCP-1	AT3G20050	FG-SD-sp	FG-SD-gr	1287.52	492.445	1.38656	0.0407258
247589_at	REV (REVOLUTA); DNA binding / lipid binding / transcription factor	REV	AT5G60690	FG-SD-sp	FG-SD-gr	249.485	95.4431	1.38624	0.0494607
248385_at	transcription factor TCP19	AT5G51910	AT5G51910	FG-SD-sp	FG-SD-gr	104.702	40.1429	1.38308	0.0225222
249065_at	zinc finger CCCH domain-containing protein 61	AT5G44260	AT5G44260	FG-SD-sp	FG-SD-gr	431.562	165.711	1.3809	0.0104035
249747_at	hypothetical protein	AT5G24600	AT5G24600	FG-SD-sp	FG-SD-gr	190.03	72.9773	1.38071	0.043051
249096_at	pfkB-like carbohydrate kinase family protein	AT5G43910	AT5G43910	FG-SD-sp	FG-SD-gr	526.755	202.904	1.37633	0.0529924
245569_at	NRPE7; DNA-directed RNA polymerase	NRPE7	AT4G14660	FG-SD-sp	FG-SD-gr	164.728	63.4795	1.37572	0.012574
265965_at	arginine biosynthesis bifunctional protein ArgJ	AT2G37500	AT2G37500	FG-SD-sp	FG-SD-gr	93.834	36.2599	1.37174	0.021031
249942_at	GAPB (GLYCERALDEHYDE-3-PHOSPHATE DEHYDROGENASE B SUBUNIT); glyceraldehyde-3-phosphate dehydrogenase (NADP+)/ glyceraldehyde-3-phosphate dehydrogenase	GAPB	AT5G22300	FG-SD-sp	FG-SD-gr	5621.23	2172.52	1.37152	0.0346262
261603_at	ATRBP47A (Arabidopsis thaliana RNA-binding protein 47a); RNA binding	ATRBP47A	AT1G49600	FG-SD-sp	FG-SD-gr	1263.79	488.531	1.37123	0.00229629
265474_at	pentatricopeptide repeat-containing protein	AT2G15690	AT2G15690	FG-SD-sp	FG-SD-gr	218.786	84.6606	1.36976	0.0183735
265908_at	DNA-binding storekeeper protein-related transcriptional regulator	AT4G00270	AT4G00270	FG-SD-sp	FG-SD-gr	107.088	41.4703	1.36865	0.0015938
253042_at	acetamidase/formamidase family protein	AT4G37550	AT4G37550	FG-SD-sp	FG-SD-gr	1201.88	466.324	1.36589	0.0542503
249860_at	Serine carboxypeptidase S28 family protein	AT5G22860	AT5G22860	FG-SD-sp	FG-SD-gr	515.663	200.411	1.36346	0.055671
252511_at	protein kinase-like protein	AT3G46280	AT3G46280	FG-SD-sp	FG-SD-gr	601.143	233.792	1.36248	0.0711597
253585_at	putative oxidoreductase/electron carrier	AT4G30720	AT4G30720	FG-SD-sp	FG-SD-gr	207.302	80.6255	1.36242	0.0484303
266300_at	PIN4 (PIN-FORMED 4); auxin:hydrogen symporter/ transporter	PIN4	AT2G01420	FG-SD-sp	FG-SD-gr	357.208	139.13	1.36033	0.00874563
254079_at	FtsJ-like methyltransferase family protein	AT4G25730	AT4G25730	FG-SD-sp	FG-SD-gr	269.832	105.373	1.35656	0.00805778
261133_at	Mannose-binding lectin superfamily protein	AT1G19715	AT1G19715	FG-SD-sp	FG-SD-gr	222.213	86.8695	1.35502	0.045956
264816_at	pentatricopeptide repeat-containing protein	AT1G03560	AT1G03560	FG-SD-sp	FG-SD-gr	152.41	59.5849	1.35494	0.00969512
246013_at	calmodulin-binding protein-like protein	AT5G10660	AT5G10660	FG-SD-sp	FG-SD-gr	42.945	16.7951	1.35445	0.0473024
250007_at	BMY3; beta-amylase/ catalytic/ cation binding	BMY3	AT5G18670	FG-SD-sp	FG-SD-gr	631.518	247.213	1.35307	0.016704
245807_at	RAP2.1 (related to AP2 1); DNA binding / transcription factor	RAP2.1	AT1G46768	FG-SD-sp	FG-SD-gr	778.186	304.832	1.3521	0.0519678
265096_at	hypothetical protein	AT1G04030	AT1G04030	FG-SD-sp	FG-SD-gr	73.6974	28.9115	1.34997	0.0541548
250972_at	LCL1 (LHY/CCA1-like 1); DNA binding / transcription factor	LCL1	AT5G02840	FG-SD-sp	FG-SD-gr	5427.26	2134.48	1.34634	0.0222814
252130_at	PSBO2 (PHOTOSYSTEM II SUBUNIT O-2); oxygen evolving/ poly(U) binding	PSBO2	AT3G50820	FG-SD-sp	FG-SD-gr	2798.45	1100.8	1.34607	0.0543427
252977_at	phospholipase like protein (PEARLI 4)	AT4G38560	AT4G38560	FG-SD-sp	FG-SD-gr	410.783	161.732	1.34477	0.00541856
258679_at	phosphoglycerate mutase, 2,3-bisphosphoglycerate-independent	AT3G08590	AT3G08590	FG-SD-sp	FG-SD-gr	1847.42	727.486	1.34452	0.0371023
252164_at	P-loop containing nucleoside triphosphate hydrolases superfamily protein	AT3G50620	AT3G50620	FG-SD-sp	FG-SD-gr	67.9399	26.776	1.34332	0.0455652
251936_at	MEE40 (maternal effect embryo arrest 40)	MEE40	AT3G53700	FG-SD-sp	FG-SD-gr	117.515	46.3419	1.34245	0.0499633
267559_at	CYP76C2; electron carrier/ heme binding / iron ion binding / monooxygenase/ oxygen binding	CYP76C2	AT2G45570	FG-SD-sp	FG-SD-gr	2526.3	996.71	1.34178	0.0558642
263914_at	AtGRF3 (GROWTH-REGULATING FACTOR 3); transcription activator	AtGRF3	AT2G36400	FG-SD-sp	FG-SD-gr	136.148	53.8533	1.33807	0.00647826
255194_at	WD-40 protein PCN	AT4G07410	AT4G07410	FG-SD-sp	FG-SD-gr	432.297	171.032	1.33776	0.0273287
261139_at	BEL10 (BEL1-LIKE HOMEODOMAIN 10); DNA binding / transcription factor	BEL10	AT1G19700	FG-SD-sp	FG-SD-gr	308.492	122.173	1.3363	0.0509084
250715_at	ATO (ATROPOS); nucleic acid binding / zinc ion binding	ATO	AT5G06160	FG-SD-sp	FG-SD-gr	232.801	92.2346	1.33572	0.0266539
249200_at	XRN2 (EXORIBONUCLEASE 2); 5'-3' exonuclease/ 5'-3' exoribonuclease/ nucleic acid binding	XRN2	AT5G42540	FG-SD-sp	FG-SD-gr	665.794	263.826	1.33549	0.0490923
253263_at	ABF3 (ABSCISIC ACID RESPONSIVE ELEMENTS-BINDING FACTOR 3); DNA binding / protein binding / transcription activator/ transcription factor	ABF3	AT4G34000	FG-SD-sp	FG-SD-gr	1369.2	542.714	1.33507	0.0377755
258202_at	DNA binding / DNA-directed RNA polymerase	AT3G13940	AT3G13940	FG-SD-sp	FG-SD-gr	422.584	167.585	1.33435	0.011153
247943_at	Tautomerase/MIF superfamily protein	AT5G57170	AT5G57170	FG-SD-sp	FG-SD-gr	198.049	78.5703	1.3338	0.0139661
259925_at	PR5 (PATHOGENESIS-RELATED GENE 5)	PR5	AT1G75040	FG-SD-sp	FG-SD-gr	2340.39	928.757	1.33338	0.0349411
254314_at	protease inhibitor/seed storage/lipid transfer protein (LTP) family protein	AT4G22470	AT4G22470	FG-SD-sp	FG-SD-gr	886.512	351.963	1.33272	0.0479548
253547_at	FAD6 (FATTY ACID DESATURASE 6); omega-6 fatty acid desaturase	FAD6	AT4G30950	FG-SD-sp	FG-SD-gr	3088.03	1226.39	1.33226	0.0311763
252036_at	hypothetical protein	AT3G52070	AT3G52070	FG-SD-sp	FG-SD-gr	1156.85	460.153	1.33002	0.0279432
263758_s_at	putative NADPH dependent mannose 6-phosphate reductase /// putative mannose-6P reductase	AT2G21250 /// AT2G21260	AT2G21250 /// AT2G21260	FG-SD-sp	FG-SD-gr	979.29	389.604	1.32973	0.0152476
246559_at	WD-40 repeat family protein	AT5G15550	AT5G15550	FG-SD-sp	FG-SD-gr	331.972	132.337	1.32684	0.00910241
260540_at	nodule inception protein-like protein 8	AT2G43500	AT2G43500	FG-SD-sp	FG-SD-gr	145.365	57.9528	1.32673	0.0316967
260250_at	PUR4 (purine biosynthesis 4); ATP binding / catalytic/ phosphoribosylformylglycinamidine synthase	PUR4	AT1G74260	FG-SD-sp	FG-SD-gr	607.413	242.19	1.32654	0.0534908
260345_at	RPK1 (RECEPTOR-LIKE PROTEIN KINASE 1); kinase/ protein binding / receptor signaling protein serine/threonine kinase	RPK1	AT1G69270	FG-SD-sp	FG-SD-gr	1255.38	501.043	1.32511	0.0448786
258806_at	hypothetical protein	AT3G04020	AT3G04020	FG-SD-sp	FG-SD-gr	88.0189	35.1331	1.32498	0.0537812
265893_at	AtRLP18 (Receptor Like Protein 18)	AtRLP18	AT2G15042	FG-SD-sp	FG-SD-gr	190.528	76.0514	1.32495	0.049918
256012_at	FMO1 (FLAVIN-DEPENDENT MONOOXYGENASE 1); FAD binding / NADP or NADPH binding / electron carrier/ flavin-containing monooxygenase/ monooxygenase/ oxidoreductase	FMO1	AT1G19250	FG-SD-sp	FG-SD-gr	924.392	369.194	1.32412	0.0363985
253252_at	ATASE2 (GLN PHOSPHORIBOSYL PYROPHOSPHATE AMIDOTRANSFERASE 2); amidophosphoribosyltransferase	ATASE2	AT4G34740	FG-SD-sp	FG-SD-gr	154.388	61.6814	1.32365	0.01187
252572_at	MLO3 (MILDEW RESISTANCE LOCUS O 3); calmodulin binding	MLO3	AT3G45290	FG-SD-sp	FG-SD-gr	604.124	241.412	1.32334	0.00240025
248851_s_at	TIR-NBS-LRR class disease resistance protein /// TIR-NBS-LRR class disease resistance protein	AT5G46260 /// AT5G46490	AT5G46260 /// AT5G46490	FG-SD-sp	FG-SD-gr	78.404	31.3547	1.32225	0.0578976
251172_at	RRF (RIBOSOME RECYCLING FACTOR, CHLOROPLAST PRECURSOR)	RRF	AT3G63190	FG-SD-sp	FG-SD-gr	914.25	365.71	1.32189	0.036226
262965_at	putative RNA binding protein	AT1G54310	AT1G54310	FG-SD-sp	FG-SD-gr	90.9797	36.4514	1.31957	0.0316527
266929_at	AT hook motif DNA-binding family protein	AT2G45850	AT2G45850	FG-SD-sp	FG-SD-gr	215.767	86.5481	1.3179	0.0404405
253028_at	pde191 (pigment defective 191)	pde191	AT4G38160	FG-SD-sp	FG-SD-gr	327.855	131.593	1.31698	0.0480464
262028_at	transcription factor TCP23	AT1G35560	AT1G35560	FG-SD-sp	FG-SD-gr	118.208	47.4572	1.31663	0.0468273
248739_at	GFA2 (GAMETOPHYTIC FACTOR 2); heat shock protein binding / unfolded protein binding	GFA2	AT5G48030	FG-SD-sp	FG-SD-gr	386.057	155.158	1.31507	0.04483
248094_at	trigger factor type chaperone family protein	AT5G55220	AT5G55220	FG-SD-sp	FG-SD-gr	106.323	42.7399	1.3148	0.000952232
257642_at	BHLH32 (BASIC HELIX-LOOP-HELIX 32); DNA binding / transcription factor	BHLH32	AT3G25710	FG-SD-sp	FG-SD-gr	83.1301	33.4309	1.31419	0.0326746
259210_at	HY2 (ELONGATED HYPOCOTYL 2); phytochromobilin:ferredoxin oxidoreductase	HY2	AT3G09150	FG-SD-sp	FG-SD-gr	604.707	243.299	1.31351	0.0523673
266606_at	CRF5 (CYTOKININ RESPONSE FACTOR 5); DNA binding / transcription factor	CRF5	AT2G46310	FG-SD-sp	FG-SD-gr	105.211	42.3526	1.31276	0.00637973
245734_at	alpha/beta-Hydrolases superfamily protein	AT1G73480	AT1G73480	FG-SD-sp	FG-SD-gr	5901.03	2375.54	1.31271	0.00758649
261075_at	tetratricopeptide repeat-containing protein-like protein	AT1G07280	AT1G07280	FG-SD-sp	FG-SD-gr	1483.18	597.512	1.31166	0.0427193
262112_at	hypothetical protein	AT1G02870	AT1G02870	FG-SD-sp	FG-SD-gr	1084.13	437.402	1.3095	0.00487015
264613_at	LIP2 (LIPOYLTRANSFERASE 2); lipoyltransferase	LIP2	AT1G04640	FG-SD-sp	FG-SD-gr	192.403	77.7417	1.30737	0.0223505
267110_at	hypothetical protein	AT2G14800	AT2G14800	FG-SD-sp	FG-SD-gr	79.7833	32.2684	1.30596	0.0179107
251243_at	hypothetical protein	AT3G61870	AT3G61870	FG-SD-sp	FG-SD-gr	730.46	295.704	1.30465	0.0246843
248798_at	50S ribosomal protein L19-2	AT5G47190	AT5G47190	FG-SD-sp	FG-SD-gr	576.163	233.291	1.30435	0.0435472
266292_at	SAG13; alcohol dehydrogenase/ oxidoreductase	SAG13	AT2G29350	FG-SD-sp	FG-SD-gr	3862.18	1564.08	1.3041	0.000451537
249258_at	lactoylglutathione lyase family protein / glyoxalase I family protein	AT5G41650	AT5G41650	FG-SD-sp	FG-SD-gr	99.821	40.4322	1.30384	0.0492501
257352_at	IMB1 (IMBIBITION-INDUCIBLE 1); DNA binding	IMB1	AT2G34900	FG-SD-sp	FG-SD-gr	289.131	117.12	1.30373	0.0528638
260639_at	hypothetical protein	AT1G53180	AT1G53180	FG-SD-sp	FG-SD-gr	575.684	233.312	1.30302	0.0337181
248282_at	membrane-associated kinase regulator family protein	AT5G52900	AT5G52900	FG-SD-sp	FG-SD-gr	220.055	89.2458	1.30201	0.0356625
245744_at	putative plastid-lipid-associated protein 12	AT1G51110	AT1G51110	FG-SD-sp	FG-SD-gr	86.9021	35.2844	1.30036	0.0406131
248558_at	xanthine/uracil permease family protein	AT5G49990	AT5G49990	FG-SD-sp	FG-SD-gr	108.953	44.2591	1.29966	0.0286948
255678_at	acyl-CoA thioesterase family protein	AT4G00520	---	FG-SD-sp	FG-SD-gr	124.769	50.6968	1.29929	0.0166803
249901_at	HD2B (HISTONE DEACETYLASE 2B); histone deacetylase	HD2B	AT5G22650	FG-SD-sp	FG-SD-gr	1082.13	439.76	1.29908	0.00502419
258403_at	plasma-membrane choline transporter family protein	AT3G15380	AT3G15380	FG-SD-sp	FG-SD-gr	265.687	108.113	1.29719	0.0155241
254761_at	CLE44 (CLAVATA3/ESR-RELATED 44)	CLE44	AT4G13195	FG-SD-sp	FG-SD-gr	349.341	142.247	1.29623	0.0260394
260288_at	Major facilitator superfamily protein	AT1G80530	AT1G80530	FG-SD-sp	FG-SD-gr	647.314	263.791	1.29507	0.0515577
266670_at	UGT71C2 (UDP-GLUCOSYL TRANSFERASE 71C2); UDP-glycosyltransferase/ quercetin 3'-O-glucosyltransferase/ quercetin 3-O-glucosyltransferase/ quercetin 7-O-glucosyltransferase/ transferase, transferring glycosyl groups	UGT71C2	AT2G29740	FG-SD-sp	FG-SD-gr	210.282	85.7123	1.29475	0.0194173
246175_s_at	hypothetical protein /// hypothetical protein	AT5G28320 /// AT5G28400	AT5G28320 /// AT5G28400	FG-SD-sp	FG-SD-gr	84.7985	34.6175	1.29254	0.0350157
266302_at	EIL1 (ETHYLENE-INSENSITIVE3-LIKE 1); transcription factor/ transcription regulator	EIL1	AT2G27050	FG-SD-sp	FG-SD-gr	1965.13	802.35	1.29232	0.0266127
257838_at	pentatricopeptide repeat-containing protein	AT3G25210	AT3G25210	FG-SD-sp	FG-SD-gr	87.1111	35.5673	1.2923	0.0093184
249808_at	hypothetical protein	AT5G23890	AT5G23890	FG-SD-sp	FG-SD-gr	345.347	141.005	1.2923	0.00497454
262594_at	60S ribosomal protein L37-1	AT1G15250	AT1G15250	FG-SD-sp	FG-SD-gr	335.62	137.181	1.29074	0.0059438
256896_at	hypothetical protein	AT3G24630	AT3G24630	FG-SD-sp	FG-SD-gr	56.8009	23.2173	1.29071	0.0212704
267556_at	BGAL9 (Beta galactosidase 9); beta-galactosidase/ catalytic/ cation binding / sugar binding	BGAL9	AT2G32810	FG-SD-sp	FG-SD-gr	570.141	233.085	1.29046	0.0383587
261725_at	SmD3 (snRNP core protein SmD3)	SmD3	AT1G76300	FG-SD-sp	FG-SD-gr	415.919	170.043	1.29041	0.00962863
264574_at	ZIP5; cation transmembrane transporter/ metal ion transmembrane transporter	ZIP5	AT1G05300	FG-SD-sp	FG-SD-gr	176.365	72.1373	1.28975	0.0503985
250867_at	thioredoxin family protein	AT5G03880	AT5G03880	FG-SD-sp	FG-SD-gr	3225.94	1319.94	1.28925	0.0245584
259982_at	ATL8; protein binding / zinc ion binding	ATL8	AT1G76410	FG-SD-sp	FG-SD-gr	847.221	346.942	1.28804	0.0183057
254543_at	Class V chitinase	AT4G19810	AT4G19810	FG-SD-sp	FG-SD-gr	1715.16	702.792	1.28717	0.057131
245723_at	pentatricopeptide repeat-containing protein	AT1G73400	AT1G73400	FG-SD-sp	FG-SD-gr	144.151	59.102	1.2863	0.00740825
267456_at	PHO2 (PHOSPHATE 2); ubiquitin-protein ligase	PHO2	AT2G33770	FG-SD-sp	FG-SD-gr	733.926	301.114	1.28532	0.0106117
258158_at	PAP17; acid phosphatase/ phosphatase/ protein serine/threonine phosphatase	PAP17	AT3G17790	FG-SD-sp	FG-SD-gr	6290.4	2581.28	1.28507	0.0416024
250443_at	RBK1 (Rop Binding protein Kinases 1); ATP binding / kinase/ protein kinase/ protein serine/threonine kinase	RBK1	AT5G10520	FG-SD-sp	FG-SD-gr	270.897	111.232	1.28417	0.016796
245005_at	30S ribosomal protein S14	rps14	ATCG00330	FG-SD-sp	FG-SD-gr	237.023	97.3716	1.28345	0.000818914
248590_at	receptor like kinase	AT5G49660	AT5G49660	FG-SD-sp	FG-SD-gr	563.603	231.586	1.28313	0.0212263
246457_at	TOZ (TORMOZEMBRYO DEFECTIVE); nucleotide binding	TOZ	AT5G16750	FG-SD-sp	FG-SD-gr	243.513	100.084	1.28278	0.00742771
251151_at	Chalcone-flavanone isomerase family protein	AT3G63170	AT3G63170	FG-SD-sp	FG-SD-gr	205.49	84.4801	1.28239	0.0136272
248276_at	YSL3 (YELLOW STRIPE LIKE 3); oligopeptide transporter	YSL3	AT5G53550	FG-SD-sp	FG-SD-gr	2418.49	994.881	1.28151	0.0210891
261197_at	GAPA-2 (GLYCERALDEHYDE 3-PHOSPHATE DEHYDROGENASE A SUBUNIT 2); NAD or NADH binding / binding / catalytic/ glyceraldehyde-3-phosphate dehydrogenase (phosphorylating)/ glyceraldehyde-3-phosphate dehydrogenase	GAPA-2	AT1G12900	FG-SD-sp	FG-SD-gr	1250.33	514.376	1.28142	0.0325268
250300_at	hypothetical protein	AT5G11890	AT5G11890	FG-SD-sp	FG-SD-gr	280.566	115.434	1.28127	0.012073
262544_at	hypothetical protein	AT1G15420	AT1G15420	FG-SD-sp	FG-SD-gr	381.058	156.785	1.28122	0.000488477
255148_at	MAPKKK10; ATP binding / kinase/ protein kinase/ protein serine/threonine kinase	MAPKKK10	AT4G08470	FG-SD-sp	FG-SD-gr	3645.89	1500.29	1.28104	0.0538589
255118_at	Nitrilase/cyanide hydratase and apolipoprotein N-acyltransferase family protein	AT4G08790	AT4G08790	FG-SD-sp	FG-SD-gr	154.957	63.7876	1.28052	0.0292406
254011_at	antitermination NusB domain-containing protein	AT4G26370	AT4G26370	FG-SD-sp	FG-SD-gr	244.217	100.723	1.27776	0.0257561
247919_at	eukaryotic translation initiation factor-like protein	AT5G57650	AT5G57650	FG-SD-sp	FG-SD-gr	211.484	87.293	1.27661	0.00266216
245482_at	hypothetical protein	AT4G16180	AT4G16180	FG-SD-sp	FG-SD-gr	421.203	174.008	1.27536	0.0287912
255685_s_at	amino acid dehydrogenase family protein /// Amino acid dehydrogenase family protein	AT4G00600 /// AT4G00620	AT4G00600 /// AT4G00620	FG-SD-sp	FG-SD-gr	170.367	70.5083	1.27278	0.0301858
255572_at	thylakoid rhodanese-like protein	TROL	AT4G01050	FG-SD-sp	FG-SD-gr	1449.55	600.125	1.27227	0.00772222
249656_at	tetratricopeptide repeat domain-containing protein	AT5G37130	AT5G37130	FG-SD-sp	FG-SD-gr	153.112	63.3944	1.27216	0.0411362
257184_at	ATMRP8; ATPase, coupled to transmembrane movement of substances	ATMRP8	AT3G13090	FG-SD-sp	FG-SD-gr	138.512	57.3648	1.27177	0.0247996
259992_at	AT-HSFA8; DNA binding / transcription factor	HSFA8	AT1G67970	FG-SD-sp	FG-SD-gr	1243.43	515.11	1.27137	0.0445982
252984_at	ELI3-2 (ELICITOR-ACTIVATED GENE 3-2); aryl-alcohol dehydrogenase/ mannitol dehydrogenase	ELI3-2	AT4G37990	FG-SD-sp	FG-SD-gr	1791.66	742.432	1.27097	0.052859
258027_at	hypothetical protein	AT3G19515	AT3G19515	FG-SD-sp	FG-SD-gr	1019.75	422.602	1.27085	0.0150049
263936_at	RNA helicase family protein	AT2G35920	AT2G35920	FG-SD-sp	FG-SD-gr	526.239	218.231	1.26986	0.0404719
248539_at	Rossmann-fold NAD(P)-binding domain-containing protein	AT5G50130	AT5G50130	FG-SD-sp	FG-SD-gr	363.429	151.002	1.2671	0.0156086
250906_at	SBE2.2 (starch branching enzyme 2.2); 1,4-alpha-glucan branching enzyme	SBE2.2	AT5G03650	FG-SD-sp	FG-SD-gr	431.601	179.411	1.26643	0.0354154
263490_at	MAX2 (MORE AXILLARY BRANCHES 2); ubiquitin-protein ligase	MAX2	AT2G42620	FG-SD-sp	FG-SD-gr	634.109	263.64	1.26616	0.0384291
257174_at	uridine kinase-like 2	UKL2	AT3G27190	FG-SD-sp	FG-SD-gr	398.028	165.759	1.26379	0.0525644
246261_at	formin-like protein 14	AFH14	AT1G31810	FG-SD-sp	FG-SD-gr	194.075	80.919	1.26206	0.0271336
266410_at	EMB2765 (EMBRYO DEFECTIVE 2765)	EMB2765	AT2G38770	FG-SD-sp	FG-SD-gr	302.643	126.524	1.25821	0.0495798
256456_at	Erythronate-4-phosphate dehydrogenase family protein	AT1G75180	AT1G75180	FG-SD-sp	FG-SD-gr	1142.29	477.791	1.25748	0.0345437
251919_at	hsp70-interacting protein FES1B-like protein	Fes1B	AT3G53800	FG-SD-sp	FG-SD-gr	225.972	94.5296	1.2573	0.00937397
264762_at	G-type lectin S-receptor-like serine/threonine-protein kinase	AT1G61460	AT1G61460	FG-SD-sp	FG-SD-gr	46.0562	19.2683	1.25716	0.0294121
261588_at	U-box domain-containing protein 56	AT1G01670	AT1G01670	FG-SD-sp	FG-SD-gr	154.262	64.5523	1.25684	0.0411488
254818_at	azelaic acid induced 1	AZI1	AT4G12470	FG-SD-sp	FG-SD-gr	11088.2	4645.47	1.25513	0.021001
245451_at	SNC1 (SUPPRESSOR OF NPR1-1, CONSTITUTIVE 1); nucleotide binding	SNC1	AT4G16890	FG-SD-sp	FG-SD-gr	670.339	281.012	1.25426	0.0307861
253438_at	SHM3 (SERINE HYDROXYMETHYLTRANSFERASE 3); catalytic/ glycine hydroxymethyltransferase/ pyridoxal phosphate binding	SHM3	AT4G32520	FG-SD-sp	FG-SD-gr	780.659	327.492	1.25323	0.0241484
260309_at	AOAT2 (ALANINE-2-OXOGLUTARATE AMINOTRANSFERASE 2); L-alanine:2-oxoglutarate aminotransferase/ glycine:2-oxoglutarate aminotransferase	AOAT2	AT1G70580	FG-SD-sp	FG-SD-gr	348.733	146.305	1.25314	0.0375134
266466_at	transducin/WD-40 repeat-containing protein	AT2G47790	AT2G47790	FG-SD-sp	FG-SD-gr	525.559	220.731	1.25157	0.0144783
264942_at	F-box protein	AT1G67340	AT1G67340	FG-SD-sp	FG-SD-gr	381.833	160.451	1.25081	0.0446039
258918_at	UNE9 (UNFERTILIZED EMBRYO SAC 9); electron carrier/ heme binding / iron ion binding / monooxygenase/ oxygen binding	UNE9	AT3G10560	FG-SD-sp	FG-SD-gr	39.3133	16.5366	1.24936	0.0343524
258118_at	RNI-like superfamily protein	AT3G14710	AT3G14710	FG-SD-sp	FG-SD-gr	109.538	46.1188	1.248	0.0522131
253272_at	SEP1 (STRESS ENHANCED PROTEIN 1); chlorophyll binding	42979	AT4G34190	FG-SD-sp	FG-SD-gr	1797.88	756.97	1.24799	0.0341769
258051_at	TRZ4 (TRNASE Z 4); 3'-tRNA processing endoribonuclease/ catalytic	TRZ4	AT3G16260	FG-SD-sp	FG-SD-gr	150.109	63.2472	1.24694	0.0295429
253027_at	pentatricopeptide repeat-containing protein	AT4G38150	AT4G38150	FG-SD-sp	FG-SD-gr	426.204	179.797	1.24517	0.00316561
257856_at	Lojap-related protein	AT3G12930	AT3G12930	FG-SD-sp	FG-SD-gr	175.201	73.9334	1.24471	0.0333316
257591_at	AtRLP39 (Receptor Like Protein 39); protein binding	AtRLP39	AT3G24900	FG-SD-sp	FG-SD-gr	119.786	50.5619	1.24433	0.0029552
257085_at	UBP14 (UBIQUITIN-SPECIFIC PROTEASE 14); ubiquitin-specific protease	UBP14	AT3G20630	FG-SD-sp	FG-SD-gr	346.073	146.202	1.24312	0.0501661
261071_at	Neutral/alkaline non-lysosomal ceramidase	AT1G07380	AT1G07380	FG-SD-sp	FG-SD-gr	330.711	139.732	1.24291	0.0252073
250987_at	pentatricopeptide repeat-containing protein	AT5G02860	AT5G02860	FG-SD-sp	FG-SD-gr	94.9748	40.2075	1.24008	0.051099
259936_at	EBS1 (EMS-mutagenized bri1 suppressor 1); UDP-glucose:glycoprotein glucosyltransferase/ transferase, transferring glycosyl groups / transferase, transferring hexosyl groups	EBS1	---	FG-SD-sp	FG-SD-gr	666.182	282.126	1.23958	0.0302249
248238_at	Serine/threonine-protein kinase-like protein	AT5G53900	AT5G53900	FG-SD-sp	FG-SD-gr	261.787	111.037	1.23735	0.00490098
267230_at	ARL (ARGOS-LIKE)	ARL	AT2G44080	FG-SD-sp	FG-SD-gr	1036.23	439.639	1.23695	0.0219887
253871_at	PORB (PROTOCHLOROPHYLLIDE OXIDOREDUCTASE B); oxidoreductase/ protochlorophyllide reductase	PORB	AT4G27440	FG-SD-sp	FG-SD-gr	806.164	342.044	1.23689	0.00131834
267469_at	WRKY21; calmodulin binding / transcription factor	WRKY21	AT2G30590	FG-SD-sp	FG-SD-gr	447.34	190.082	1.23475	0.0301105
250158_at	hypothetical protein	AT5G15190	AT5G15190	FG-SD-sp	FG-SD-gr	1466.37	623.244	1.23438	0.00222192
252982_at	HD1 (HISTONE DEACETYLASE 1); basal transcription repressor/ histone deacetylase/ protein binding	HD1	AT4G38130	FG-SD-sp	FG-SD-gr	1814.79	772.582	1.23204	0.0308284
251657_at	nucleolar essential protein-related protein	AT3G57000	AT3G57000	FG-SD-sp	FG-SD-gr	343.622	146.402	1.23088	0.00530172
263322_at	RNEE/G (RNASE E/G-LIKE); endoribonuclease	RNEE/G	AT2G04270	FG-SD-sp	FG-SD-gr	80.8543	34.4847	1.22937	0.00445026
265978_at	---	---	AT2G11140	FG-SD-sp	FG-SD-gr	132.188	56.3794	1.22935	0.0110395
254178_at	hypothetical protein	AT4G23880	AT4G23880	FG-SD-sp	FG-SD-gr	3179.35	1361.35	1.22369	0.0299964
249722_at	hypothetical protein	AT5G35430	AT5G35430	FG-SD-sp	FG-SD-gr	106.516	45.675	1.2216	0.0545118
267274_at	mitochondrial substrate carrier family protein	AT2G30160	AT2G30160	FG-SD-sp	FG-SD-gr	399.394	171.333	1.22101	0.00910092
263934_at	EDA12 (embryo sac development arrest 12)	EDA12	AT2G35950	FG-SD-sp	FG-SD-gr	87.2997	37.4609	1.22059	0.054914
248362_at	FIB1 (FIBRILLARIN 1); snoRNA binding	FIB1	AT5G52470	FG-SD-sp	FG-SD-gr	5325.29	2286.86	1.21949	0.037078
259690_at	replication factor C 2	RFC2	AT1G63160	FG-SD-sp	FG-SD-gr	249.476	107.155	1.21919	0.00261669
258155_at	RACK1C_AT (RECEPTOR FOR ACTIVATED C KINASE 1 C); nucleotide binding	RACK1C_AT	AT3G18130	FG-SD-sp	FG-SD-gr	586.849	252.127	1.21884	0.00236168
247972_at	HAG2 (HISTONE ACETYLTRANSFERASE OF THE GNAT FAMILY 2); H4 histone acetyltransferase/ histone acetyltransferase	HAG2	AT5G56740	FG-SD-sp	FG-SD-gr	245.055	105.309	1.21848	0.0383007
254193_at	hypothetical protein	AT4G23870	AT4G23870	FG-SD-sp	FG-SD-gr	290.158	124.749	1.21781	0.0483714
261296_at	hypothetical protein	AT1G48460	AT1G48460	FG-SD-sp	FG-SD-gr	144.13	61.9923	1.21721	0.0236124
266979_at	PPL2 (PsbP-like protein 2); calcium ion binding	PPL2	AT2G39470	FG-SD-sp	FG-SD-gr	356.275	153.702	1.21285	0.058061
263483_at	CR88; ATP binding	CR88	AT2G04030	FG-SD-sp	FG-SD-gr	322.028	138.972	1.21239	0.00071102
263679_at	DEAD-box ATP-dependent RNA helicase 22	AT1G59990	AT1G59990	FG-SD-sp	FG-SD-gr	118.425	51.1996	1.20977	0.0117987
253881_at	ARM repeat superfamily protein	AT4G27640	AT4G27640	FG-SD-sp	FG-SD-gr	232.252	100.437	1.2094	0.0516648
257193_at	pentatricopeptide repeat-containing protein	AT3G13160	AT3G13160	FG-SD-sp	FG-SD-gr	206.132	89.1479	1.2093	0.0353421
247339_at	Nucleic acid-binding, OB-fold-like protein	AT5G63690	AT5G63690	FG-SD-sp	FG-SD-gr	113.908	49.2736	1.20898	0.0410519
247723_at	putative protein phosphatase 2C 78	HAI1	AT5G59220	FG-SD-sp	FG-SD-gr	7122.98	3082.52	1.20837	0.0504524
266081_at	putative serine/threonine protein kinase ATG1c	AT2G37840	AT2G37840	FG-SD-sp	FG-SD-gr	185.393	80.3162	1.20682	0.00805969
260269_at	TIR-NBS-LRR class disease resistance protein	AT1G63740	AT1G63740	FG-SD-sp	FG-SD-gr	195.144	84.5854	1.20606	0.0308298
252968_at	tRNA-dihydrouridine(47) synthase [NAD(P)(+)]-like	AT4G38890	AT4G38890	FG-SD-sp	FG-SD-gr	435.62	188.901	1.20544	0.00503472
260528_at	WRKY23; transcription factor	WRKY23	AT2G47260	FG-SD-sp	FG-SD-gr	296.638	128.646	1.20529	0.0479824
266118_at	LCR68 (LOW-MOLECULAR-WEIGHT CYSTEINE-RICH 68); peptidase inhibitor	LCR68	AT2G02130	FG-SD-sp	FG-SD-gr	695.101	302.044	1.20246	0.00225475
247926_at	methyltransferase-like protein	AT5G57280	AT5G57280	FG-SD-sp	FG-SD-gr	170.307	74.026	1.20203	0.00267423
249489_at	HXXXD-type acyl-transferase-like protein	AT5G39090	AT5G39090	FG-SD-sp	FG-SD-gr	275.965	119.972	1.20178	0.0369087
252543_at	PHOT1 (PHOTOTROPIN 1); FMN binding / blue light photoreceptor/ kinase/ protein binding / protein serine/threonine kinase	PHOT1	AT3G45780	FG-SD-sp	FG-SD-gr	2433.21	1060.35	1.19832	0.00240307
263001_at	TAF6B4 (TBP-ASSOCIATED FACTOR 6B4); DNA binding / RNA polymerase II transcription factor/ transcription initiation factor	TAF6B4	AT1G54360	FG-SD-sp	FG-SD-gr	1198.88	522.551	1.19804	0.0455378
246846_at	hypothetical protein	AT5G26760	AT5G26760	FG-SD-sp	FG-SD-gr	694.652	303.518	1.19451	0.0428617
263823_s_at	putative dehydration-responsive element-binding protein 2H /// dehydration-responsive element-binding protein 2C	AT2G40350 /// DREB2C	AT2G40340 /// AT2G40350	FG-SD-sp	FG-SD-gr	84.5542	36.9707	1.19349	0.0464818
257950_at	UGT71B6 (UDP-glucosyl transferase 71B6); UDP-glycosyltransferase/ abscisic acid glucosyltransferase/ transferase, transferring glycosyl groups	UGT71B6	AT3G21780	FG-SD-sp	FG-SD-gr	1202.74	525.983	1.19324	0.0273595
247277_at	DNA polymerase V family protein	AT5G64420	AT5G64420	FG-SD-sp	FG-SD-gr	329.74	144.302	1.19224	0.0435311
265668_at	Acyl-CoA N-acyltransferases (NAT) superfamily protein	AT2G32020	AT2G32020	FG-SD-sp	FG-SD-gr	321.404	140.811	1.19063	0.0065732
254870_at	G-type lectin S-receptor-like serine/threonine-protein kinase	AT4G11900	AT4G11900	FG-SD-sp	FG-SD-gr	342.276	150.042	1.1898	0.000987765
262272_at	hypothetical protein	AT1G42440	AT1G42440	FG-SD-sp	FG-SD-gr	414.555	181.758	1.18954	0.00563234
245778_at	RNA recognition motif-containing protein	AT1G73530	AT1G73530	FG-SD-sp	FG-SD-gr	543.416	238.497	1.18809	0.0384717
256590_at	ATHMG (ARABIDOPSIS THALIANA HIGH MOBILITY GROUP); transcription factor	ATHMG	AT3G28730	FG-SD-sp	FG-SD-gr	1001.35	439.784	1.18708	0.0406551
252353_at	hypothetical protein	AT3G48200	AT3G48200	FG-SD-sp	FG-SD-gr	178.962	78.6551	1.18604	0.0549735
255997_s_at	CAB3 (CHLOROPHYLL A/B BINDING PROTEIN 3); chlorophyll binding	CAB3	AT1G29910 /// AT1G29920 /// AT1G29930	FG-SD-sp	FG-SD-gr	14779.7	6501.53	1.18476	0.0330485
257147_at	TRAM, LAG1 and CLN8 (TLC) lipid-sensing domain containing protein	AT3G27270	AT3G27270	FG-SD-sp	FG-SD-gr	326.383	143.624	1.18427	0.0331766
245505_at	monothiol glutaredoxin-S5	AT4G15690	AT4G15690	FG-SD-sp	FG-SD-gr	400.174	176.355	1.18215	0.00763778
245063_at	mitochondrial glycoprotein family protein	AT2G39795	AT2G39795	FG-SD-sp	FG-SD-gr	229.816	101.342	1.18126	0.0512862
251214_at	hypothetical protein	AT3G62500	AT3G62500	FG-SD-sp	FG-SD-gr	88.3107	38.9467	1.18108	0.0169359
262784_at	SEX1 (STARCH EXCESS 1); alpha-glucan, water dikinase	SEX1	AT1G10760	FG-SD-sp	FG-SD-gr	1417.15	625.299	1.18037	0.0255511
257373_at	transcription factor bHLH129	AT2G43140	AT2G43140	FG-SD-sp	FG-SD-gr	111.365	49.1522	1.17998	0.0298797
245100_at	UBP5 (UBIQUITIN-SPECIFIC PROTEASE 5); ubiquitin-specific protease	UBP5	AT2G40930	FG-SD-sp	FG-SD-gr	745.34	328.976	1.17991	0.00721043
267619_at	leucine-rich repeat protein kinase family protein	AT2G26730	AT2G26730	FG-SD-sp	FG-SD-gr	290.193	128.086	1.1799	0.0374062
245028_at	coiled-coil protein WEB1	AT2G26570	AT2G26570	FG-SD-sp	FG-SD-gr	835.037	368.656	1.17957	0.044916
245440_at	putative RNA helicase	AT4G16680	AT4G16680	FG-SD-sp	FG-SD-gr	200.865	88.7038	1.17915	0.00883293
255559_at	protein kinase family protein	AT4G02010	AT4G02010	FG-SD-sp	FG-SD-gr	308.326	136.207	1.17866	0.0475189
256008_s_at	Pyridoxal phosphate-dependent transferases superfamily protein /// tryptophan aminotransferase-related protein 4	AT1G34040 /// AT1G34060	AT1G34040 /// AT1G34060	FG-SD-sp	FG-SD-gr	108.333	47.8734	1.17818	0.0618469
255623_at	50S ribosomal protein L5	AT4G01310	AT4G01310	FG-SD-sp	FG-SD-gr	1583.44	700.57	1.17646	0.0525239
251859_at	proteophosphoglycan-related protein	AT3G54680	AT3G54680	FG-SD-sp	FG-SD-gr	851.3	376.705	1.17623	0.0300137
259943_at	nuclear transport factor 2 (NTF2) family protein	AT1G71480	AT1G71480	FG-SD-sp	FG-SD-gr	639.49	283.018	1.17603	0.027406
258152_at	TCP-1/cpn60 chaperonin family protein	AT3G18190	AT3G18190	FG-SD-sp	FG-SD-gr	2401.94	1063.32	1.17562	0.0064397
250975_at	hypothetical protein	AT5G03050	AT5G03050	FG-SD-sp	FG-SD-gr	215.641	95.4881	1.17524	0.0435611
246886_at	CLC-D (CHLORIDE CHANNEL D); anion channel/ voltage-gated chloride channel	CLC-D	AT5G26240	FG-SD-sp	FG-SD-gr	706.26	313.275	1.17277	0.00159025
264957_at	SKP2B; ubiquitin-protein ligase	SKP2B	AT1G77000	FG-SD-sp	FG-SD-gr	3650.19	1623.46	1.1689	0.0473682
250763_at	putative tropine dehydrogenase	AT5G06060	AT5G06060	FG-SD-sp	FG-SD-gr	740.923	329.563	1.16877	0.043373
259872_at	eukaryotic translation initiation factor 2 (eIF-2) family protein	AT1G76810	AT1G76810	FG-SD-sp	FG-SD-gr	896.638	398.851	1.16867	0.0149498
251705_at	WRKY70; transcription factor/ transcription repressor	WRKY70	AT3G56400	FG-SD-sp	FG-SD-gr	2818.57	1254.02	1.16841	0.0359108
245116_at	Nup93/Nic96 nucleoporin interacting component-containing protein	AT2G41620	AT2G41620	FG-SD-sp	FG-SD-gr	888.184	395.369	1.16766	0.0456038
259791_at	metallo-beta-lactamase domain-containing protein	AT1G29700	AT1G29700	FG-SD-sp	FG-SD-gr	200.384	89.2213	1.1673	0.0248163
247390_at	hypothetical protein	AT5G63520	AT5G63520	FG-SD-sp	FG-SD-gr	216.755	96.6794	1.16479	0.0204525
266070_at	EXLB3 (EXPANSIN-LIKE B3 PRECURSOR)	EXLB3	AT2G18660	FG-SD-sp	FG-SD-gr	6100.21	2721.72	1.16434	0.00889104
245764_s_at	transducin family protein / WD-40 repeat family protein	ATCSA-1	AT1G19750 /// AT1G27840	FG-SD-sp	FG-SD-gr	163.744	73.2507	1.16053	0.0573587
255912_at	Terpenoid cyclases family protein	AT1G66960	AT1G66960	FG-SD-sp	FG-SD-gr	186.921	83.749	1.15828	0.035393
267432_at	putative UDP-N-acetylglucosamine pyrophosphorylase	GlcNA.1UT2	AT2G35020	FG-SD-sp	FG-SD-gr	1416.98	635.316	1.15727	0.0401545
265028_at	transducin/WD-40 repeat-containing protein	AT1G24530	AT1G24530	FG-SD-sp	FG-SD-gr	512.539	229.869	1.15685	0.0427403
262644_at	BETA-VPE (BETA VACUOLAR PROCESSING ENZYME); cysteine-type endopeptidase	BETA-VPE	AT1G62710	FG-SD-sp	FG-SD-gr	150.101	67.3247	1.15672	0.0370159
256207_at	nucleolar GTP-binding protein 1	AT1G50920	AT1G50920	FG-SD-sp	FG-SD-gr	1168.35	526.06	1.15118	9.45435e-05
247607_at	pentatricopeptide repeat-containing protein	AT5G60960	AT5G60960	FG-SD-sp	FG-SD-gr	217.879	98.1232	1.15086	0.0501049
253600_at	scpl29 (serine carboxypeptidase-like 29); serine-type carboxypeptidase	scpl29	AT4G30810	FG-SD-sp	FG-SD-gr	637.185	286.986	1.15073	0.0510991
246568_at	DEL2 (DP-E2F-LIKE 2); DNA binding / transcription factor	DEL2	AT5G14960	FG-SD-sp	FG-SD-gr	95.2455	42.9036	1.15055	0.0424115
256397_at	MKP2 (MAPK PHOSPHATASE 2); MAP kinase phosphatase/ protein tyrosine/serine/threonine phosphatase	MKP2	AT3G06110	FG-SD-sp	FG-SD-gr	1266.58	570.627	1.15031	0.025204
263943_at	S-adenosyl methionine transporter-like protein	AT2G35800	AT2G35800	FG-SD-sp	FG-SD-gr	841.908	379.855	1.14821	0.0258756
258457_at	IGPD; imidazoleglycerol-phosphate dehydratase	IGPD	AT3G22425	FG-SD-sp	FG-SD-gr	212.12	95.7597	1.14739	0.0125671
245512_at	RNA binding protein	AT4G15770	AT4G15770	FG-SD-sp	FG-SD-gr	695.172	313.948	1.14684	0.00736989
249961_at	F-box/FBD/LRR-repeat protein	AT5G18770	AT5G18770	FG-SD-sp	FG-SD-gr	178.001	80.542	1.14408	0.00776811
246210_at	ribosomal protein L12 family protein	AT4G36420	AT4G36420	FG-SD-sp	FG-SD-gr	140.093	63.4015	1.14379	0.00478717
249482_at	hypothetical protein	AT5G38980	AT5G38980	FG-SD-sp	FG-SD-gr	5732.51	2599.46	1.14095	0.0231272
253111_at	hypothetical protein	AT4G35940	AT4G35940	FG-SD-sp	FG-SD-gr	1763.88	800.583	1.13963	0.0239211
245456_at	RPP5 (RECOGNITION OF PERONOSPORA PARASITICA 5); nucleotide binding	RPP5	AT4G16950	FG-SD-sp	FG-SD-gr	2059.84	935.118	1.13931	0.0485953
266752_at	ABCB4 (ATP BINDING CASSETTE SUBFAMILY B4); ATPase, coupled to transmembrane movement of substances / xenobiotic-transporting ATPase	ABCB4	AT2G47000	FG-SD-sp	FG-SD-gr	533.007	242.093	1.1386	0.0508615
258495_at	nucleotide/sugar transporter family protein	AT3G02690	AT3G02690	FG-SD-sp	FG-SD-gr	465.008	211.214	1.13855	0.04472
252098_at	aspartyl protease family protein	AT3G51330	AT3G51330	FG-SD-sp	FG-SD-gr	408.577	185.642	1.13808	0.0623634
256741_at	XH domain-containing protein	AT3G29375	AT3G29375	FG-SD-sp	FG-SD-gr	81.2747	36.9337	1.13787	0.0548316
258286_at	ATP binding microtubule motor family protein	AT3G16060	AT3G16060	FG-SD-sp	FG-SD-gr	412.67	187.632	1.13709	0.0113589
264125_at	EMB1135 (embryo defective 1135); DNA binding / protein binding / zinc ion binding	EMB1135	AT1G79350	FG-SD-sp	FG-SD-gr	362.336	164.843	1.13623	0.0210377
247726_at	TRP1 (TELOMERIC REPEAT BINDING PROTEIN 1); DNA binding / double-stranded telomeric DNA binding	TRP1	AT5G59430	FG-SD-sp	FG-SD-gr	1266.71	576.292	1.13621	0.035467
253310_at	EX1 (EXECUTER1)	EX1	AT4G33630	FG-SD-sp	FG-SD-gr	659.688	300.213	1.1358	0.0416754
254188_at	UGE2 (UDP-D-glucose/UDP-D-galactose 4-epimerase 2); UDP-glucose 4-epimerase/ protein dimerization	UGE2	AT4G23920	FG-SD-sp	FG-SD-gr	932.262	424.573	1.13472	0.0327852
248700_at	ATGLR1.2; intracellular ligand-gated ion channel	ATGLR1.2	AT5G48400	FG-SD-sp	FG-SD-gr	478.313	217.969	1.13383	0.0210794
264394_at	aminomethyltransferase	AT1G11860	AT1G11860	FG-SD-sp	FG-SD-gr	691.94	315.467	1.13316	0.0156671
260323_at	IMP4	IMP4	AT1G63780	FG-SD-sp	FG-SD-gr	383.85	175.056	1.13273	0.00843792
250706_at	DHS (DEOXYHYPUSINE SYNTHASE)	DHS	AT5G05920	FG-SD-sp	FG-SD-gr	116.57	53.2081	1.13148	0.0541348
245793_at	NAD(P)-binding Rossmann-fold-containing protein	AT1G32220	AT1G32220	FG-SD-sp	FG-SD-gr	493.308	225.383	1.13011	0.0521804
252508_at	ribosomal protein S5 domain 2-like superfamily protein	AT3G46210	AT3G46210	FG-SD-sp	FG-SD-gr	264.256	120.874	1.12843	0.0359772
263497_at	COR15A (COLD-REGULATED 15A)	COR15A	AT2G42540	FG-SD-sp	FG-SD-gr	489.099	223.853	1.12757	0.0560832
257710_at	hypothetical protein	AT3G27350	AT3G27350	FG-SD-sp	FG-SD-gr	239.695	109.744	1.12705	0.0127156
250970_at	hypothetical protein	AT5G02770	AT5G02770	FG-SD-sp	FG-SD-gr	1330.8	609.569	1.12644	0.0330942
264590_at	hypothetical protein	AT2G17710	AT2G17710	FG-SD-sp	FG-SD-gr	1094.06	501.526	1.12529	0.0162251
261669_at	hypothetical protein	AT1G18490	AT1G18490	FG-SD-sp	FG-SD-gr	144.291	66.3128	1.12162	0.0664935
251215_at	protein disulfide isomerase-like protein	AT3G62510	AT3G62510	FG-SD-sp	FG-SD-gr	98.6779	45.3517	1.12157	0.00352639
258366_at	RAP2.2; DNA binding / transcription factor	RAP2.2	AT3G14230	FG-SD-sp	FG-SD-gr	2064.86	949.203	1.12125	0.0489937
266428_at	putative serine/threonine kinase	AT2G07180	AT2G07180	FG-SD-sp	FG-SD-gr	2686.53	1235.16	1.12105	0.0201196
259599_at	SCPL45 (SERINE CARBOXYPEPTIDASE-LIKE 45 PRECURSOR); serine-type carboxypeptidase	SCPL45	AT1G28110	FG-SD-sp	FG-SD-gr	103.095	47.5219	1.11731	0.0213102
253133_at	NRPB1 (RNA POLYMERASE II LARGE SUBUNIT); DNA binding / DNA-directed RNA polymerase	NRPB1	AT4G35800	FG-SD-sp	FG-SD-gr	1150.92	530.943	1.11616	0.00437039
245108_at	CKX1 (CYTOKININ OXIDASE/DEHYDROGENASE 1); cytokinin dehydrogenase	CKX1	AT2G41510	FG-SD-sp	FG-SD-gr	197.917	91.3134	1.116	0.0362839
261253_at	aspartyl protease family protein	AT1G05840	AT1G05840	FG-SD-sp	FG-SD-gr	2282.44	1053.4	1.11552	0.0400741
251739_at	CAN (CA-2+ DEPENDENT NUCLEASE); nuclease	CAN	AT3G56170	FG-SD-sp	FG-SD-gr	2939.81	1357.76	1.11449	0.0397261
264965_at	SWIM zinc finger domain-containing protein	AT1G60560	AT1G60560	FG-SD-sp	FG-SD-gr	170.047	78.5854	1.1136	0.0352315
248236_at	early nodulin-like protein 1	ENODL1	AT5G53870	FG-SD-sp	FG-SD-gr	1917.95	887.133	1.11235	0.0388952
250009_at	nuclear FMRP-interacting protein	AT5G18440	AT5G18440	FG-SD-sp	FG-SD-gr	92.9634	43.0303	1.11131	0.00968572
264562_at	BTB/POZ domain-containing protein	AT1G55760	AT1G55760	FG-SD-sp	FG-SD-gr	208.567	96.5718	1.11084	0.0643311
264006_at	ATHB6; DNA binding / protein binding / sequence-specific DNA binding / transcription activator/ transcription factor	ATHB6	AT2G22430	FG-SD-sp	FG-SD-gr	2469.38	1143.51	1.11068	0.0519012
251411_at	CKB3; protein kinase regulator/ transcription factor binding	CKB3	AT3G60250	FG-SD-sp	FG-SD-gr	1671.91	774.45	1.11026	0.0262917
260717_at	serine/threonine-protein phosphatase 7 long form homolog	AT1G48120	AT1G48120	FG-SD-sp	FG-SD-gr	89.3388	41.3847	1.11019	0.0055983
246110_at	SOUL heme-binding protein	AT5G20140	AT5G20140	FG-SD-sp	FG-SD-gr	116.719	54.0852	1.10973	0.0737781
258729_at	ANT1 (AROMATIC AND NEUTRAL TRANSPORTER 1); amino acid transmembrane transporter/ aromatic amino acid transmembrane transporter/ neutral amino acid transmembrane transporter	ANT1	AT3G11900	FG-SD-sp	FG-SD-gr	2975.73	1379.32	1.10928	0.00544805
256833_at	putative calcium-transporting ATPase 13	AT3G22910	AT3G22910	FG-SD-sp	FG-SD-gr	521.295	241.669	1.10907	0.00538866
247357_at	leucine-rich repeat protein kinase family protein	AT5G63710	AT5G63710	FG-SD-sp	FG-SD-gr	367.045	170.172	1.10897	0.0237072
250813_at	TOC34 (TRANSLOCON AT THE OUTER ENVELOPE MEMBRANE OF CHLOROPLASTS 34); GTP binding	TOC34	AT5G05000	FG-SD-sp	FG-SD-gr	618.153	286.613	1.10886	0.0339405
257232_at	PAP1 (PHYTOCHROME-ASSOCIATED PROTEIN 1); transcription factor	PAP1	AT3G16500	FG-SD-sp	FG-SD-gr	573.635	266.364	1.10674	0.0465132
245326_at	hypothetical protein	AT4G14100	AT4G14100	FG-SD-sp	FG-SD-gr	183.041	84.995	1.10671	0.0510495
262879_at	SIGA (SIGMA FACTOR A); DNA binding / DNA-directed RNA polymerase/ sigma factor/ transcription factor	SIGA	AT1G64860	FG-SD-sp	FG-SD-gr	746.885	347.534	1.10373	0.0296068
257802_at	Autophagy-related protein 13	AT3G18770	AT3G18770	FG-SD-sp	FG-SD-gr	173.347	80.7032	1.10296	0.0100976
266237_at	ATRPC14 (RNA POLYMERASE 14 KDA SUBUNIT); DNA binding / DNA-directed RNA polymerase/ protein dimerization	ATRPC14	AT2G29540	FG-SD-sp	FG-SD-gr	113.15	52.7736	1.10035	0.027518
266474_at	protein TRICHOME BIREFRINGENCE-LIKE 40	AT2G31110	AT2G31110	FG-SD-sp	FG-SD-gr	308.594	144.066	1.09898	0.0483415
260266_at	zinc finger protein CONSTANS-LIKE 6	AT1G68520	AT1G68520	FG-SD-sp	FG-SD-gr	1336.55	624.205	1.09842	0.0238846
251116_at	scpl40 (serine carboxypeptidase-like 40); serine-type carboxypeptidase	scpl40	AT3G63470	FG-SD-sp	FG-SD-gr	75.9272	35.4819	1.09753	0.0153865
246699_at	pre-rRNA-processing protein TSR2, conserved region-containing protein	AT5G27990	AT5G27990	FG-SD-sp	FG-SD-gr	638.04	298.294	1.09691	0.00203454
256145_at	bifunctional inhibitor/lipid-transfer protein/seed storage 2S albumin-like protein	AT1G48750	AT1G48750	FG-SD-sp	FG-SD-gr	194.403	90.9536	1.09585	0.0300382
260144_at	ABC transporter G family member 25	ABCG25	AT1G71960	FG-SD-sp	FG-SD-gr	230.521	108.06	1.09307	0.0229181
258382_at	UBC25 (UBIQUITIN-CONJUGATING ENZYME 25); small conjugating protein ligase	UBC25	AT3G15355	FG-SD-sp	FG-SD-gr	310.322	145.483	1.09291	0.00338766
251664_at	CRD1 (COPPER RESPONSE DEFECT 1); DNA binding / magnesium-protoporphyrin IX monomethyl ester (oxidative) cyclase	CRD1	AT3G56940	FG-SD-sp	FG-SD-gr	5513.6	2588	1.09116	0.0113125
263824_at	transducin/WD-40 repeat-containing protein	AT2G40360	AT2G40360	FG-SD-sp	FG-SD-gr	835.161	392.09	1.09087	0.00149907
246925_at	CYP71B14; electron carrier/ heme binding / iron ion binding / monooxygenase/ oxygen binding	CYP71B14	AT5G25180	FG-SD-sp	FG-SD-gr	1102.04	517.704	1.08998	0.0472082
257725_at	MSH2 (MUTS HOMOLOG 2); ATP binding / damaged DNA binding / mismatched DNA binding / protein binding	MSH2	AT3G18524	FG-SD-sp	FG-SD-gr	88.6482	41.6509	1.08975	0.000356498
253999_at	ACS7; 1-aminocyclopropane-1-carboxylate synthase	ACS7	AT4G26200	FG-SD-sp	FG-SD-gr	219.855	103.304	1.08965	0.0233095
264286_at	PPR336 (pentatricopeptide repeat 336)	PPR336	AT1G61870	FG-SD-sp	FG-SD-gr	253.941	119.385	1.08887	0.00611024
259543_at	small nuclear ribonucleoprotein-like protein	AT1G20580	AT1G20580	FG-SD-sp	FG-SD-gr	747.463	351.533	1.08834	0.00729104
246521_at	N2,N2-dimethylguanosine tRNA methyltransferase	AT5G15810	AT5G15810	FG-SD-sp	FG-SD-gr	544.809	256.632	1.08605	0.0376706
261536_at	KEA1 (K EFFLUX ANTIPORTER 1); potassium ion transmembrane transporter/ potassium:hydrogen antiporter	KEA1	AT1G01790	FG-SD-sp	FG-SD-gr	603.158	284.127	1.086	0.0430608
261598_at	leucine-rich repeat (LRR) family protein	AT1G49750	AT1G49750	FG-SD-sp	FG-SD-gr	488.999	230.52	1.08494	0.0382305
249927_at	APL1 (ADP GLUCOSE PYROPHOSPHORYLASE LARGE SUBUNIT 1); glucose-1-phosphate adenylyltransferase	APL1	AT5G19220	FG-SD-sp	FG-SD-gr	1091.49	514.612	1.08475	0.0161213
255682_at	NAD(P)-binding Rossmann-fold superfamily protein	AT4G00560	AT4G00560	FG-SD-sp	FG-SD-gr	446.429	210.608	1.08387	0.00410241
250732_at	phosphatidylinositol/phosphatidylglycerol transfer protein domain-containing protein	AT5G06480	AT5G06480	FG-SD-sp	FG-SD-gr	57.6234	27.2621	1.07976	0.0529665
249307_s_at	XPB1 (ARABIDOPSIS HOMOLOG OF XERODERMA PIGMENTOSUM COMPLEMENTATION GROUP B 1); ATP binding / ATP-dependent DNA helicase/ ATP-dependent helicase/ DNA binding / helicase/ hydrolase/ nucleic acid binding	XPB1	AT5G41360 /// AT5G41370	FG-SD-sp	FG-SD-gr	436.637	206.618	1.07947	0.00448004
261439_at	hypothetical protein	AT1G28395	AT1G28395	FG-SD-sp	FG-SD-gr	193.798	91.7698	1.07846	0.0440088
250213_at	TBP1 (TELOMERIC DNA BINDING PROTEIN 1); DNA binding / double-stranded telomeric DNA binding	TBP1	AT5G13820	FG-SD-sp	FG-SD-gr	1450.82	687.135	1.0782	0.057796
247131_at	FNR1 (FERREDOXIN-NADP(+)-OXIDOREDUCTASE 1); NADPH dehydrogenase/ electron transporter, transferring electrons within the cyclic electron transport pathway of photosynthesis/ electron transporter, transferring electrons within the noncyclic electron transp	FNR1	AT5G66190	FG-SD-sp	FG-SD-gr	1204.4	570.796	1.07726	0.0442137
266284_at	APUM2 (Arabidopsis Pumilio 2); RNA binding / binding	APUM2	AT2G29190	FG-SD-sp	FG-SD-gr	212.858	100.963	1.07606	0.00836964
262005_at	ATGCN3; transporter	ATGCN3	AT1G64550	FG-SD-sp	FG-SD-gr	809.674	384.173	1.07558	0.0402473
260732_at	putative telomere repeat-binding factor 4	AT1G17520	AT1G17520	FG-SD-sp	FG-SD-gr	541.908	257.143	1.07548	0.00631895
246910_at	polynucleotidyl transferase, ribonuclease H-like superfamily protein	AT5G25800	AT5G25800	FG-SD-sp	FG-SD-gr	222.259	105.578	1.07394	0.0349719
256288_at	PRMT3 (PROTEIN ARGININE METHYLTRANSFERASE 3); methyltransferase/ zinc ion binding	PRMT3	AT3G12270	FG-SD-sp	FG-SD-gr	179.968	85.4973	1.07379	0.000163031
255128_at	hypothetical protein	AT4G08310	AT4G08310	FG-SD-sp	FG-SD-gr	662.33	314.805	1.07309	0.0218512
246454_at	DHAR3 (dehydroascorbate reductase 1); glutathione dehydrogenase (ascorbate)	DHAR3	AT5G16710	FG-SD-sp	FG-SD-gr	1178.48	560.277	1.07271	0.052386
266285_at	hypothetical protein	AT2G29180	AT2G29180	FG-SD-sp	FG-SD-gr	304.885	145.109	1.07112	0.0528957
254980_at	60S ribosomal protein L9-2	AT4G10450	AT4G10450	FG-SD-sp	FG-SD-gr	838.058	399.396	1.06923	0.032461
261079_s_at	transcription factor IIA, alpha/beta subunit /// transcription factor IIA, alpha/beta subunit	AT1G07470 /// AT1G07480	AT1G07470 /// AT1G07480	FG-SD-sp	FG-SD-gr	1874.88	894.71	1.06731	0.0529341
256902_s_at	hypothetical protein /// RNA-directed DNA polymerase (reverse transcriptase)-related protein	AT3G23910 /// AT3G24255	AT3G23910 /// AT3G24255	FG-SD-sp	FG-SD-gr	401.143	191.472	1.06698	0.0437155
247902_at	AHA3; ATPase/ hydrogen-exporting ATPase, phosphorylative mechanism	AHA3	AT5G57350	FG-SD-sp	FG-SD-gr	2859.19	1367.58	1.06398	0.00222251
258658_at	ADK1 (adenosine kinase 1); adenosine kinase/ copper ion binding	ADK1	AT3G09820	FG-SD-sp	FG-SD-gr	787.929	377.162	1.06288	0.0126647
250275_at	hypothetical protein	AT5G13030	AT5G13030	FG-SD-sp	FG-SD-gr	784.46	375.628	1.0624	0.000360172
261553_at	hypothetical protein	AT1G63420	AT1G63420	FG-SD-sp	FG-SD-gr	263.916	126.427	1.06178	0.0206693
250459_at	THO complex subunit 1	THO1	AT5G09860	FG-SD-sp	FG-SD-gr	289.558	138.716	1.06172	0.00548732
250293_s_at	auxin-responsive GH3 family protein /// auxin-responsive GH3 family protein	AT5G13360 /// AT5G13370	AT5G13360 /// AT5G13370	FG-SD-sp	FG-SD-gr	1478.3	708.23	1.06165	0.0394701
267553_s_at	PTAC18 (PLASTID TRANSCRIPTIONALLY ACTIVE 18)	PTAC18	AT2G32180 /// AT2G32650	FG-SD-sp	FG-SD-gr	324.048	155.319	1.06098	0.00114258
267644_s_at	TRAF-like family protein /// TRAF-like family protein	AT2G32870 /// AT2G32880	AT2G32870 /// AT2G32880	FG-SD-sp	FG-SD-gr	494.548	237.234	1.0598	0.0415032
265010_at	T-complex protein 1 subunit epsilon	AT1G24510	AT1G24510	FG-SD-sp	FG-SD-gr	2681.12	1286.98	1.05885	0.0115053
257075_at	pre-mRNA-processing protein 40B	PRP40B	AT3G19670	FG-SD-sp	FG-SD-gr	214.61	103.085	1.05789	0.0506007
249318_at	AtUK/UPRT1 (Uridine kinase/Uracil phosphoribosyltransferase 1); ATP binding / kinase/ uracil phosphoribosyltransferase/ uridine kinase	AtUK/UPRT1	AT5G40870	FG-SD-sp	FG-SD-gr	343.048	164.941	1.05646	0.00952577
254831_at	ribosomal protein L7Ae/L30e/S12e/Gadd45 family protein	AT4G12600	AT4G12600	FG-SD-sp	FG-SD-gr	663.802	319.227	1.05617	0.00194351
264945_at	MAF1 (MADS AFFECTING FLOWERING 1); transcription factor	MAF1	AT1G77080	FG-SD-sp	FG-SD-gr	431.24	207.4	1.05607	0.0467401
245898_at	protein kinase superfamily protein	AT5G11020	AT5G11020	FG-SD-sp	FG-SD-gr	135.417	65.1484	1.05561	0.0189488
245615_at	---	---	AT4G14470	FG-SD-sp	FG-SD-gr	49.8015	23.9749	1.05466	0.0548972
247453_at	hypothetical protein	AT5G62440	AT5G62440	FG-SD-sp	FG-SD-gr	541.532	260.769	1.05428	0.00462865
260670_at	NFD5 (NUCLEAR FUSION DEFECTIVE 5)	NFD5	AT1G19520	FG-SD-sp	FG-SD-gr	141.609	68.2013	1.05405	0.0177779
247370_at	nuclear protein X1	NPX1	AT5G63320	FG-SD-sp	FG-SD-gr	274.463	132.212	1.05376	0.0512605
256323_at	hypothetical protein	AT1G54920	AT1G54920	FG-SD-sp	FG-SD-gr	508.108	244.787	1.05361	0.0351853
251052_at	DPA; transcription factor	DPA	AT5G02470	FG-SD-sp	FG-SD-gr	183.157	88.2853	1.05284	0.0381383
258894_at	AtRLP32 (Receptor Like Protein 32); kinase/ protein binding	AtRLP32	AT3G05650	FG-SD-sp	FG-SD-gr	469.535	226.336	1.05277	0.0233656
258853_at	putative beta-1,3-galactosyltransferase 16	AT3G06440	AT3G06440	FG-SD-sp	FG-SD-gr	250.759	121.025	1.051	0.0526589
260062_at	pentatricopeptide repeat-containing protein	AT1G73710	AT1G73710	FG-SD-sp	FG-SD-gr	163.356	78.8532	1.05077	0.0505194
267018_at	SVR1 (SUPPRESSOR OF VARIEGATION 1); RNA binding / pseudouridine synthase	SVR1	AT2G39140	FG-SD-sp	FG-SD-gr	180.476	87.1397	1.05041	0.037179
252395_at	AHA4; ATPase/ hydrogen-exporting ATPase, phosphorylative mechanism	AHA4	AT3G47950	FG-SD-sp	FG-SD-gr	541.792	261.698	1.04983	0.0316548
248743_at	hypothetical protein	AT5G48240	AT5G48240	FG-SD-sp	FG-SD-gr	208.53	100.786	1.04896	0.0226613
261615_at	hypothetical protein	AT1G33050	AT1G33050	FG-SD-sp	FG-SD-gr	4240.04	2049.6	1.04873	0.00143685
267004_at	WDxR motif-containing protein	AT2G34260	AT2G34260	FG-SD-sp	FG-SD-gr	185.218	89.5932	1.04776	0.0199277
252100_at	Half-A-TPR repeat-containing protein	AT3G51110	AT3G51110	FG-SD-sp	FG-SD-gr	188.07	90.9911	1.04747	0.0074703
250900_at	ATB' ALPHA; protein phosphatase type 2A regulator	ATB' ALPHA	AT5G03470	FG-SD-sp	FG-SD-gr	1565.38	757.872	1.04649	0.0220435
259490_at	hypothetical protein	AT1G15800	AT1G15800	FG-SD-sp	FG-SD-gr	462.62	223.983	1.04643	0.0428606
246926_at	hypothetical protein	AT5G25240	AT5G25240	FG-SD-sp	FG-SD-gr	190.725	92.372	1.04597	0.0141632
257218_at	RNA-editing factor interacting protein 1	AT3G15000	AT3G15000	FG-SD-sp	FG-SD-gr	588.677	285.438	1.0443	0.0482826
258634_at	RNA recognition motif-containing protein	AT3G08000	AT3G08000	FG-SD-sp	FG-SD-gr	74.5132	36.1458	1.04367	0.0310305
247795_at	zinc finger CCCH domain-containing protein 66	AT5G58620	AT5G58620	FG-SD-sp	FG-SD-gr	369.921	179.546	1.04286	0.0166956
250146_at	PDF1B (PEPTIDE DEFORMYLASE 1B); iron ion binding / peptide deformylase	PDF1B	AT5G14660	FG-SD-sp	FG-SD-gr	152.077	73.8433	1.04227	0.0180309
248971_at	TIR-NBS-LRR class disease resistance protein	AT5G45000	AT5G45000	FG-SD-sp	FG-SD-gr	253.54	123.136	1.04196	0.0218341
248128_at	THI1; protein homodimerization	THI1	AT5G54770	FG-SD-sp	FG-SD-gr	8422.47	4091.22	1.04171	0.0546106
259229_at	ADA2A (HOMOLOG OF YEAST ADA2 2A); DNA binding / transcription factor	ADA2A	AT3G07740	FG-SD-sp	FG-SD-gr	341.87	166.203	1.0405	0.0530934
250824_at	aarF domain-containing protein kinase	AT5G05200	AT5G05200	FG-SD-sp	FG-SD-gr	2420.93	1178.08	1.03913	0.000736838
255475_at	AAA-type ATPase family protein	AT4G02480	AT4G02480	FG-SD-sp	FG-SD-gr	250.782	122.066	1.03878	0.0143294
246594_at	P5CR (PYRROLINE-5- CARBOXYLATE (P5C) REDUCTASE); pyrroline-5-carboxylate reductase	P5CR	AT5G14800	FG-SD-sp	FG-SD-gr	1564.86	761.719	1.0387	0.0339096
264705_at	ATP binding/leucine-tRNA ligases/aminoacyl-tRNA ligases	AT1G09620	AT1G09620	FG-SD-sp	FG-SD-gr	1182.97	576.432	1.03719	0.0168343
250529_at	DEAD-box ATP-dependent RNA helicase 26	AT5G08610	AT5G08610	FG-SD-sp	FG-SD-gr	143.372	69.8642	1.03714	0.0316851
254684_at	GR-RBP2 (GLYCINE-RICH RNA-BINDING PROTEIN 2); ATP binding / RNA binding / double-stranded DNA binding / single-stranded DNA binding	GR-RBP2	AT4G13850	FG-SD-sp	FG-SD-gr	1827.69	890.762	1.03691	0.0359051
260128_at	S-adenosylmethionine-dependent methyltransferase domain-containing protein	AT1G36310	AT1G36310	FG-SD-sp	FG-SD-gr	570.098	278.013	1.03606	0.0509267
261429_at	WRKY61; transcription factor	WRKY61	AT1G18860	FG-SD-sp	FG-SD-gr	332.324	162.074	1.03593	0.035605
246389_at	AAP3; amino acid transmembrane transporter	AAP3	AT1G77380	FG-SD-sp	FG-SD-gr	441.076	215.144	1.03572	0.0218474
259417_at	HFR1 (LONG HYPOCOTYL IN FAR-RED); DNA binding / protein binding / transcription factor	HFR1	AT1G02340	FG-SD-sp	FG-SD-gr	1059.16	516.664	1.03562	0.00878567
266173_at	hypothetical protein	AT2G02410	AT2G02410	FG-SD-sp	FG-SD-gr	115.266	56.2421	1.03525	0.0116837
259043_at	ARM repeat superfamily protein	AT3G03440	AT3G03440	FG-SD-sp	FG-SD-gr	231.99	113.22	1.03493	0.0144104
248755_at	uncharacterized binding protein	AT5G47690	AT5G47690	FG-SD-sp	FG-SD-gr	257.113	125.502	1.0347	0.0285475
260858_at	RING/FYVE/PHD zinc finger-containing protein	AT1G43770	AT1G43770	FG-SD-sp	FG-SD-gr	114.823	56.0679	1.03417	0.0321818
247487_at	peptidoglycan-binding LysM domain-containing protein	AT5G62150	AT5G62150	FG-SD-sp	FG-SD-gr	1713.7	836.908	1.03398	0.0426035
246019_at	pentatricopeptide repeat-containing protein	AT5G10690	AT5G10690	FG-SD-sp	FG-SD-gr	164.356	80.2943	1.03346	0.0138271
257224_at	putative phospholipid-transporting ATPase 8	AT3G27870	AT3G27870	FG-SD-sp	FG-SD-gr	221.93	108.461	1.03293	0.0479898
265093_at	ABC transporter I family member 19	AT1G03905	AT1G03905	FG-SD-sp	FG-SD-gr	169.558	82.8848	1.0326	0.00310239
255706_at	ATRPS13A (ARABIDOPSIS THALIANA RIBOSOMAL PROTEIN S13A); structural constituent of ribosome	ATRPS13A	AT4G00100	FG-SD-sp	FG-SD-gr	3441.04	1682.68	1.03208	0.0223699
258026_at	ABF4 (ABRE BINDING FACTOR 4); DNA binding / protein binding / transcription activator/ transcription factor	ABF4	AT3G19290	FG-SD-sp	FG-SD-gr	927.957	453.788	1.03204	0.0229465
262788_at	hypothetical protein	AT1G10690	AT1G10690	FG-SD-sp	FG-SD-gr	161.931	79.1975	1.03185	0.0539622
248815_at	Intron maturase, type II family protein	AT5G46920	AT5G46920	FG-SD-sp	FG-SD-gr	218.634	106.998	1.03093	0.0309641
250485_at	PROPEP5 (Elicitor peptide 5 precursor)	PROPEP5	AT5G09990	FG-SD-sp	FG-SD-gr	111.094	54.4145	1.02971	0.0528102
256430_at	DREB2B (DRE/CRT-BINDING PROTEIN 2B); DNA binding / transcription activator/ transcription factor	DREB2B	AT3G11020	FG-SD-sp	FG-SD-gr	362.629	177.661	1.02937	0.0215952
251143_at	SQD2 (sulfoquinovosyldiacylglycerol 2); UDP-glycosyltransferase/ UDP-sulfoquinovose:DAG sulfoquinovosyltransferase/ transferase, transferring glycosyl groups	SQD2	AT5G01220	FG-SD-sp	FG-SD-gr	239.026	117.13	1.02906	0.046637
248502_at	MYND-type zinc finger protein	AT5G50450	AT5G50450	FG-SD-sp	FG-SD-gr	1444.55	709.069	1.02662	0.043322
253545_at	AIG2-like protein	AT4G31310	AT4G31310	FG-SD-sp	FG-SD-gr	204.545	100.462	1.02576	0.0297061
245090_at	nodulin MtN21-like transporter family protein	AT2G40900	AT2G40900	FG-SD-sp	FG-SD-gr	173.747	85.4036	1.02462	0.0147399
260772_at	aspartyl protease	AT1G49050	AT1G49050	FG-SD-sp	FG-SD-gr	4181.7	2056.03	1.02423	0.0135583
265039_at	hypothetical protein	AT1G04000	AT1G04000	FG-SD-sp	FG-SD-gr	439.064	215.894	1.02411	0.00207642
246527_at	alpha-L RNA-binding motif/ribosomal protein S4 family protein	AT5G15750	AT5G15750	FG-SD-sp	FG-SD-gr	906.426	445.741	1.02398	0.0228248
261614_at	PAB8 (POLY(A) BINDING PROTEIN 8); RNA binding / translation initiation factor	PAB8	AT1G49760	FG-SD-sp	FG-SD-gr	1242.66	611.499	1.02301	0.00209468
255791_at	DAL1 (DIFFERENTIATION AND GREENING-LIKE 1)	DAL1	AT2G33430	FG-SD-sp	FG-SD-gr	526.602	259.156	1.02289	0.032897
246829_at	ATGWD3; carbohydrate kinase/ catalytic/ phosphoglucan, water dikinase	ATGWD3	AT5G26570	FG-SD-sp	FG-SD-gr	1063.33	523.304	1.02286	0.0518227
267545_at	GRP23 (GLYCINE-RICH PROTEIN 23)	GRP23	AT2G32690	FG-SD-sp	FG-SD-gr	104.327	51.398	1.02132	0.0164817
246272_at	MES9 (METHYL ESTERASE 9); hydrolase, acting on ester bonds / methyl indole-3-acetate esterase/ methyl jasmonate esterase/ methyl salicylate esterase	MES9	AT4G37150	FG-SD-sp	FG-SD-gr	1315.77	648.288	1.0212	0.0105724
250406_at	ATER	ER	AT5G10810	FG-SD-sp	FG-SD-gr	911.976	449.525	1.0206	0.0134645
263077_at	EMB2763 (EMBRYO DEFECTIVE 2763); RNA binding / ribonuclease	EMB2763	AT2G17510	FG-SD-sp	FG-SD-gr	797.331	393.428	1.01908	0.0384685
253558_at	SKB1 (SHK1 BINDING PROTEIN 1); protein methyltransferase	SKB1	AT4G31120	FG-SD-sp	FG-SD-gr	180.276	88.962	1.01895	0.00986822
247032_at	SDN3 (SMALL RNA DEGRADING NUCLEASE 3); exonuclease/ nucleic acid binding	SDN3	AT5G67240	FG-SD-sp	FG-SD-gr	276.309	136.413	1.0183	7.04305e-05
248786_at	hypothetical protein	AT5G47400	AT5G47400	FG-SD-sp	FG-SD-gr	235.131	116.121	1.01784	0.0176727
246503_at	40S ribosomal protein S7-3	AT5G16130	AT5G16130	FG-SD-sp	FG-SD-gr	2254.06	1113.22	1.01778	0.00210821
255728_at	plasma-membrane choline transporter-like protein	AT1G25500	AT1G25500	FG-SD-sp	FG-SD-gr	743.793	367.711	1.01633	0.0524514
260337_at	WRKY57; transcription factor	WRKY57	AT1G69310	FG-SD-sp	FG-SD-gr	754.835	373.444	1.01527	0.0460841
247367_at	oxygen-independent coproporphyrinogen III oxidase-like protein	AT5G63290	AT5G63290	FG-SD-sp	FG-SD-gr	79.2704	39.2669	1.01347	0.0117242
262636_at	NIH (NUCLEAR DEIH-BOXHELICASE); DNA binding / DNA helicase	NIH	AT1G06670	FG-SD-sp	FG-SD-gr	316.913	157.04	1.01295	0.0166774
251251_at	protein kinase-domain containing protein	AT3G62220	AT3G62220	FG-SD-sp	FG-SD-gr	618.176	306.4	1.0126	0.00514873
246929_at	hypothetical protein	AT5G25210	AT5G25210	FG-SD-sp	FG-SD-gr	222.976	110.584	1.01175	0.0275996
254281_at	putative sodium/metabolite cotransporter BASS6	AT4G22840	AT4G22840	FG-SD-sp	FG-SD-gr	465.651	230.997	1.01138	0.0177019
249996_at	monothiol glutaredoxin-S2	AT5G18600	AT5G18600	FG-SD-sp	FG-SD-gr	4889.61	2426.35	1.01093	0.0278779
267102_at	EMB2776; nucleotide binding	LIS	AT2G41500	FG-SD-sp	FG-SD-gr	811.986	403.073	1.01042	0.0224033
245002_at	photosystem II protein D2	psbD	ATCG00270	FG-SD-sp	FG-SD-gr	1583.42	786.12	1.01022	0.036878
262095_at	tetratricopeptide repeat-containing protein	AT1G56090	AT1G56090	FG-SD-sp	FG-SD-gr	567.905	282.243	1.00871	0.0182812
251031_at	OHP (ONE HELIX PROTEIN)	OHP	AT5G02120	FG-SD-sp	FG-SD-gr	567.363	282.488	1.00608	0.0230492
254715_at	putative triglyceride lipase	AT4G13550	AT4G13550	FG-SD-sp	FG-SD-gr	310.753	154.73	1.00602	0.0207405
259977_at	PLATZ transcription factor family protein	AT1G76590	AT1G76590	FG-SD-sp	FG-SD-gr	3510.86	1748.65	1.00559	0.0213794
253176_at	WD repeat-containing protein 42A	AT4G35140	AT4G35140	FG-SD-sp	FG-SD-gr	154.269	76.84	1.00552	0.0221985
259129_at	PTF1 (PLASTID TRANSCRIPTION FACTOR 1); transcription factor	PTF1	AT3G02150	FG-SD-sp	FG-SD-gr	2315.66	1154.27	1.00444	0.0227043
250039_at	TIR-NBS-LRR class disease resistance protein	AT5G18370	AT5G18370	FG-SD-sp	FG-SD-gr	95.3875	47.5813	1.00341	0.0385108
259812_at	hypothetical protein	AT1G49840	AT1G49840	FG-SD-sp	FG-SD-gr	149.976	74.8203	1.00323	0.0490113
266253_at	HDT4; histone deacetylase	HDT4	AT2G27840	FG-SD-sp	FG-SD-gr	200.39	100.05	1.00208	0.0106738
260312_at	TIR-NBS-LRR class disease resistance protein	AT1G63880	AT1G63880	FG-SD-sp	FG-SD-gr	1232.02	615.419	1.00138	0.0318782
267064_at	CAM2 (CALMODULIN 2); calcium ion binding / protein binding	CAM2	AT2G41110	FG-SD-sp	FG-SD-gr	1632.93	3267.24	-1.00061	0.0307007
252482_at	UGT76E11 (UDP-GLUCOSYL TRANSFERASE 76E11); UDP-glycosyltransferase/ quercetin 3-O-glucosyltransferase/ quercetin 7-O-glucosyltransferase/ transferase, transferring glycosyl groups	UGT76E11	AT3G46670	FG-SD-sp	FG-SD-gr	146.347	292.997	-1.00149	0.0316223
264209_at	RABG3B; GTP binding	RABG3B	AT1G22740	FG-SD-sp	FG-SD-gr	211.954	424.849	-1.0032	0.0274459
255878_at	bZIP transcription factor	AT2G40620	AT2G40620	FG-SD-sp	FG-SD-gr	114.66	229.84	-1.00327	0.0220783
250493_at	ARM repeat superfamily protein	AT5G09800	AT5G09800	FG-SD-sp	FG-SD-gr	70.6854	141.842	-1.0048	0.0295916
265375_at	VPS2.1	VPS2.1	AT2G06530	FG-SD-sp	FG-SD-gr	1654.46	3320.94	-1.00523	0.0431774
264826_at	2A6; oxidoreductase	2A6	AT1G03410	FG-SD-sp	FG-SD-gr	73.8592	148.262	-1.0053	0.0385063
245750_at	HTA10; DNA binding	HTA10	AT1G51060	FG-SD-sp	FG-SD-gr	363.156	729.128	-1.00558	0.0194771
258108_at	alpha/beta-Hydrolases superfamily protein	AT3G23570	AT3G23570	FG-SD-sp	FG-SD-gr	1851.65	3717.72	-1.00561	0.0222433
263807_at	indole-3-glycerol phosphate synthase	AT2G04400	AT2G04400	FG-SD-sp	FG-SD-gr	2581.31	5183.76	-1.0059	0.00255689
249640_at	CAT3 (CATIONIC AMINO ACID TRANSPORTER 3); basic amino acid transmembrane transporter/ cationic amino acid transmembrane transporter	CAT3	AT5G36940	FG-SD-sp	FG-SD-gr	136.624	274.473	-1.00645	0.0279056
248609_at	hypothetical protein	AT5G49440	AT5G49440	FG-SD-sp	FG-SD-gr	87.1848	175.379	-1.00832	0.021039
258369_at	ATPME3; pectinesterase	ATPME3	AT3G14310	FG-SD-sp	FG-SD-gr	286.501	576.593	-1.00901	0.022571
246405_at	Toll-Interleukin-Resistance domain-containing protein	AT1G57630	AT1G57630	FG-SD-sp	FG-SD-gr	914.282	1844.18	-1.01227	0.0457507
264554_at	alcohol dehydrogenase-like protein	AT1G09510	AT1G09510	FG-SD-sp	FG-SD-gr	38.7992	78.2932	-1.01286	0.021913
260798_at	F-box protein	AT1G78280	AT1G78280	FG-SD-sp	FG-SD-gr	1256.93	2537.66	-1.01359	0.0114005
264130_at	hypothetical protein	AT1G79160	AT1G79160	FG-SD-sp	FG-SD-gr	337.14	680.756	-1.01379	0.0182373
259747_at	probable 3-hydroxyisobutyrate dehydrogenase-like 2	AT1G71170	AT1G71170	FG-SD-sp	FG-SD-gr	284.468	574.414	-1.01383	0.00103449
249325_at	UPM1 (UROPHORPHYRIN METHYLASE 1); uroporphyrin-III C-methyltransferase	UPM1	AT5G40850	FG-SD-sp	FG-SD-gr	220.438	445.244	-1.01422	0.0200523
263957_at	TPX2 (targeting protein for Xklp2)-like protein	AT2G35880	AT2G35880	FG-SD-sp	FG-SD-gr	196.321	396.831	-1.01531	0.0304189
251308_at	GAUT1 (GALACTURONOSYLTRANSFERASE 1); polygalacturonate 4-alpha-galacturonosyltransferase/ transferase, transferring glycosyl groups	GAUT1	AT3G61130	FG-SD-sp	FG-SD-gr	187.045	378.297	-1.01613	0.0216379
248751_at	putative MO25-like protein	AT5G47540	AT5G47540	FG-SD-sp	FG-SD-gr	162.107	328.002	-1.01676	0.0268502
261165_at	EMB3003 (embryo defective 3003); acyltransferase/ dihydrolipoyllysine-residue acetyltransferase/ protein binding	EMB3003	AT1G34430	FG-SD-sp	FG-SD-gr	336.447	681.841	-1.01906	0.00375672
265416_at	DNA-binding protein S1FA2	AT2G37120	AT2G37120	FG-SD-sp	FG-SD-gr	535.498	1085.28	-1.01911	0.00248399
255512_at	SYP42 (SYNTAXIN OF PLANTS 42); SNAP receptor	SYP42	AT4G02195	FG-SD-sp	FG-SD-gr	268.942	545.127	-1.0193	0.00689811
259040_at	ATGSTU8 (GLUTATHIONE S-TRANSFERASE TAU 8); glutathione transferase	ATGSTU8	AT3G09270	FG-SD-sp	FG-SD-gr	706.479	1433.82	-1.02115	0.0276239
265709_at	---	---	AT2G03540	FG-SD-sp	FG-SD-gr	56.828	115.438	-1.02244	0.0261746
256257_at	ATE2 (ARGININE-TRNA PROTEIN TRANSFERASE 2); arginyltransferase	ATE2	AT3G11240	FG-SD-sp	FG-SD-gr	71.2026	144.763	-1.0237	0.0415738
261973_at	WD40 domain-containing protein	AT1G64610	AT1G64610	FG-SD-sp	FG-SD-gr	750.138	1527.51	-1.02595	0.0094835
254216_at	VAG2; hydrolase, acting on acid anhydrides, catalyzing transmembrane movement of substances	VAG2	AT4G23710	FG-SD-sp	FG-SD-gr	723.448	1473.79	-1.02657	0.0380496
256720_at	Dof-type zinc finger DNA-binding family protein	AT2G34140	AT2G34140	FG-SD-sp	FG-SD-gr	132.285	269.707	-1.02775	0.054948
266094_at	Yos1-like protein	AT2G37975	AT2G37975	FG-SD-sp	FG-SD-gr	415.879	848.872	-1.02938	0.0419299
249638_at	acetyl-CoA synthetase	ACS	AT5G36880	FG-SD-sp	FG-SD-gr	1133.37	2316.71	-1.03146	0.046642
248087_at	hypothetical protein	AT5G55060	AT5G55060	FG-SD-sp	FG-SD-gr	194.508	397.64	-1.03164	0.00295797
254409_at	cysteine-rich receptor-like protein kinase 28	CRK28	AT4G21400	FG-SD-sp	FG-SD-gr	323.52	661.908	-1.03278	0.0621112
266167_at	YLS5	YLS5	AT2G38860	FG-SD-sp	FG-SD-gr	1473.16	3015.87	-1.03366	0.0206911
255999_at	WRKY71; transcription factor	WRKY71	AT1G29860	FG-SD-sp	FG-SD-gr	82.467	168.902	-1.03429	0.0227961
265053_at	mannose-binding lectin superfamily protein	AT1G52000	AT1G52000	FG-SD-sp	FG-SD-gr	40.4284	82.829	-1.03477	0.0269416
249984_at	anamorsin homolog	AT5G18400	AT5G18400	FG-SD-sp	FG-SD-gr	616.424	1264.29	-1.03634	0.0342758
246593_at	ARM repeat superfamily protein	AT5G14790	AT5G14790	FG-SD-sp	FG-SD-gr	100.113	205.515	-1.03761	0.0289449
248769_at	Sec14p-like phosphatidylinositol transfer family protein	AT5G47730	AT5G47730	FG-SD-sp	FG-SD-gr	410.154	843.419	-1.04008	0.00614552
262826_at	CYP71B2 (CYTOCHROME P450 71B2); electron carrier/ heme binding / iron ion binding / monooxygenase/ oxygen binding	CYP71B2	AT1G13080	FG-SD-sp	FG-SD-gr	214.85	441.937	-1.04051	0.0153195
261506_at	ATCK1 (CHOLINE KINASE 1); choline kinase	ATCK1	AT1G71697	FG-SD-sp	FG-SD-gr	1144.93	2359.1	-1.04298	0.0364227
265034_at	transcription factor bHLH112	AT1G61660	AT1G61660	FG-SD-sp	FG-SD-gr	670.08	1383.13	-1.04553	0.0344922
259309_at	protein kinase superfamily protein	AT3G05050	AT3G05050	FG-SD-sp	FG-SD-gr	211.004	435.724	-1.04614	0.0226647
246828_at	---	---	AT5G26350	FG-SD-sp	FG-SD-gr	34.1767	70.5814	-1.04628	0.0344847
267265_at	serine-type carboxypeptidase	SCPL13	AT2G22980	FG-SD-sp	FG-SD-gr	1527.89	3157.08	-1.04705	0.0194556
264910_at	TIR class disease resistance protein	AT1G61100	AT1G61100	FG-SD-sp	FG-SD-gr	309.264	639.647	-1.04843	0.0432854
266927_at	PIP1B (NAMED PLASMA MEMBRANE INTRINSIC PROTEIN 1B); water channel	PIP1B	AT2G45960	FG-SD-sp	FG-SD-gr	3721.26	7699.02	-1.04888	0.0488034
265872_at	atnudt17 (Arabidopsis thaliana Nudix hydrolase homolog 17); hydrolase	atnudt17	AT2G01670	FG-SD-sp	FG-SD-gr	2966.34	6137.49	-1.04897	0.054482
267610_at	AKT1 (ARABIDOPSIS K TRANSPORTER 1); cyclic nucleotide binding / inward rectifier potassium channel	AKT1	AT2G26650	FG-SD-sp	FG-SD-gr	435.221	900.719	-1.04933	0.00362976
249783_at	SOS3 (SALT OVERLY SENSITIVE 3); calcium ion binding / calcium-dependent protein serine/threonine phosphatase	SOS3	AT5G24270	FG-SD-sp	FG-SD-gr	275.096	569.694	-1.05026	0.0302984
263881_at	hypothetical protein	AT2G21820	AT2G21820	FG-SD-sp	FG-SD-gr	69.1926	143.312	-1.05047	0.0217957
257058_at	ATCOX17; copper chaperone	COX17	AT3G15352	FG-SD-sp	FG-SD-gr	383.197	794.76	-1.05243	0.0430961
246863_at	early nodulin-related protein	AT5G25940	AT5G25940	FG-SD-sp	FG-SD-gr	1514.56	3141.25	-1.05244	0.0431196
252374_at	ARR5 (ARABIDOPSIS RESPONSE REGULATOR 5); transcription regulator/ two-component response regulator	ARR5	AT3G48100	FG-SD-sp	FG-SD-gr	367.175	762.098	-1.05351	0.0190856
246334_at	serine/threonine kinase 23	AT3G44850	AT3G44850	FG-SD-sp	FG-SD-gr	110.674	229.713	-1.05352	0.0405575
254367_at	hypothetical protein	AT4G21700	AT4G21700	FG-SD-sp	FG-SD-gr	65.9355	136.896	-1.05395	0.038196
258005_at	Granulin repeat cysteine protease family protein	AT3G19390	AT3G19390	FG-SD-sp	FG-SD-gr	474.647	985.783	-1.05441	0.0471439
262587_at	alpha/beta-hydrolase domain-containing protein	AT1G15490	AT1G15490	FG-SD-sp	FG-SD-gr	84.5885	175.684	-1.05445	0.0122035
255568_at	WRKY22; transcription factor	WRKY22	AT4G01250	FG-SD-sp	FG-SD-gr	742.471	1542.39	-1.05476	0.0349954
263904_at	PDR6; ATPase, coupled to transmembrane movement of substances	PDR6	AT2G36380	FG-SD-sp	FG-SD-gr	1187.92	2470.88	-1.05659	0.0453352
262797_at	TMT1 (TONOPLAST MONOSACCHARIDE TRANSPORTER1); carbohydrate transmembrane transporter/ nucleoside transmembrane transporter/ sugar:hydrogen symporter	TMT1	AT1G20840	FG-SD-sp	FG-SD-gr	856.001	1781.42	-1.05735	0.0143047
250350_at	hypothetical protein	AT5G12010	AT5G12010	FG-SD-sp	FG-SD-gr	706.314	1471.8	-1.0592	0.00733557
257315_at	ERD5 (EARLY RESPONSIVE TO DEHYDRATION 5); proline dehydrogenase	ERD5	AT3G30775	FG-SD-sp	FG-SD-gr	2335.53	4874.29	-1.06144	0.00569602
266000_at	CYP71B6 (CYTOCHROME P450 71B6); electron carrier/ heme binding / iron ion binding / monooxygenase/ oxygen binding	CYP71B6	AT2G24180	FG-SD-sp	FG-SD-gr	3632.17	7580.77	-1.06151	0.0269259
264687_at	XBCP3 (xylem bark cysteine peptidase 3); cysteine-type endopeptidase/ cysteine-type peptidase	XBCP3	AT1G09850	FG-SD-sp	FG-SD-gr	313.79	654.937	-1.06156	0.000973239
251368_at	phosphatidylinositol N-acetyglucosaminlytransferase subunit P-like protein	AT3G61380	AT3G61380	FG-SD-sp	FG-SD-gr	24.8595	51.9222	-1.06256	0.0504446
257226_at	hypothetical protein	AT3G27880	AT3G27880	FG-SD-sp	FG-SD-gr	119.235	249.763	-1.06675	0.0477047
259692_at	transacting siRNA generating locus	AT1G63080	AT1G63080	FG-SD-sp	FG-SD-gr	40.5438	84.9283	-1.06676	0.0274632
247037_at	RALFL34 (ralf-like 34); signal transducer	RALFL34	AT5G67070	FG-SD-sp	FG-SD-gr	143.828	301.284	-1.06678	0.0451464
250400_at	putative protein phosphatase 2C 69	AT5G10740	AT5G10740	FG-SD-sp	FG-SD-gr	350.659	735.38	-1.06842	0.0312381
267055_at	PRA1.B4 (PRENYLATED RAB ACCEPTOR 1.B4)	PRA1.B4	AT2G38360	FG-SD-sp	FG-SD-gr	170.967	359.538	-1.07242	0.0498564
259822_at	MYB20 (myb domain protein 20); DNA binding / transcription factor	MYB20	AT1G66230	FG-SD-sp	FG-SD-gr	90.2834	190.218	-1.07512	0.016812
267361_at	acid phosphatase class IIIB protein	AT2G39920	AT2G39920	FG-SD-sp	FG-SD-gr	201.508	424.709	-1.07564	0.00599607
265070_at	BCDH BETA1 (BRANCHED-CHAIN ALPHA-KETO ACID DECARBOXYLASE E1 BETA SUBUNIT); 3-methyl-2-oxobutanoate dehydrogenase (2-methylpropanoyl-transferring)/ catalytic	BCDH BETA1	AT1G55510	FG-SD-sp	FG-SD-gr	1921.02	4050.39	-1.07619	0.00857559
249481_at	Thioredoxin superfamily protein	AT5G38900	AT5G38900	FG-SD-sp	FG-SD-gr	853.956	1803.51	-1.07857	0.00696431
251550_at	hypothetical protein	AT3G58800	AT3G58800	FG-SD-sp	FG-SD-gr	55.12	116.477	-1.0794	0.018474
263935_at	PUB23 (PLANT U-BOX 23); ubiquitin-protein ligase	PUB23	AT2G35930	FG-SD-sp	FG-SD-gr	666.161	1410.31	-1.08207	0.00161143
251922_at	Protein kinase protein with tetratricopeptide repeat domain	AT3G54030	AT3G54030	FG-SD-sp	FG-SD-gr	222.471	470.993	-1.08209	0.0453825
247026_at	MAPKKK19; ATP binding / kinase/ protein kinase/ protein serine/threonine kinase	MAPKKK19	AT5G67080	FG-SD-sp	FG-SD-gr	461.899	979.759	-1.08485	0.0441207
249139_at	AZF3 (ARABIDOPSIS ZINC-FINGER PROTEIN 3); DNA binding / nucleic acid binding / transcription factor/ transcription repressor/ zinc ion binding	AZF3	AT5G43170	FG-SD-sp	FG-SD-gr	144.01	305.798	-1.08641	0.022718
246612_at	hypothetical protein	AT5G35320	AT5G35320	FG-SD-sp	FG-SD-gr	513.946	1091.91	-1.08716	0.0361434
250301_at	hypothetical protein	AT5G11970	AT5G11970	FG-SD-sp	FG-SD-gr	792.032	1685.7	-1.08972	0.00324184
245152_at	NAD+ transporter 1	NDT1	AT2G47490	FG-SD-sp	FG-SD-gr	338.867	721.755	-1.09079	0.00913875
252205_at	hypothetical protein	AT3G50350	AT3G50350	FG-SD-sp	FG-SD-gr	100.528	214.276	-1.09187	0.0282451
262882_at	CYP89A2 (CYTOCHROME P450 89A2); electron carrier/ heme binding / iron ion binding / monooxygenase/ oxygen binding	CYP89A2	AT1G64900	FG-SD-sp	FG-SD-gr	240.086	512.196	-1.09314	0.00259253
266596_at	late embryogenesis abundant hydroxyproline-rich glycoprotein	AT2G46150	AT2G46150	FG-SD-sp	FG-SD-gr	66.3136	141.491	-1.09333	0.0015405
262725_at	Sphingomyelin synthetase family protein	AT1G43580	AT1G43580	FG-SD-sp	FG-SD-gr	315.025	672.329	-1.0937	0.0173081
261038_at	hypothetical protein	AT1G17490	AT1G17490	FG-SD-sp	FG-SD-gr	952.934	2035.74	-1.09511	0.00305794
253041_at	PCK1 (PHOSPHOENOLPYRUVATE CARBOXYKINASE 1); ATP binding / phosphoenolpyruvate carboxykinase (ATP)/ phosphoenolpyruvate carboxykinase/ purine nucleotide binding	PCK1	AT4G37870	FG-SD-sp	FG-SD-gr	944.354	2019.16	-1.09635	0.0158949
255012_at	hydrolase, alpha/beta fold family protein	AT4G10030	AT4G10030	FG-SD-sp	FG-SD-gr	260.09	556.112	-1.09636	0.0303363
258046_at	ATMKK5 (ARABIDOPSIS THALIANA MITOGEN-ACTIVATED PROTEIN KINASE KINASE 5); MAP kinase kinase/ kinase	MKK5	AT3G21220	FG-SD-sp	FG-SD-gr	422.739	904.029	-1.0966	0.0342513
248877_at	hypothetical protein	AT5G46140	AT5G46140	FG-SD-sp	FG-SD-gr	48.8383	104.498	-1.0974	0.014042
266479_at	LSH3 (LIGHT SENSITIVE HYPOCOTYLS 3)	LSH3	AT2G31160	FG-SD-sp	FG-SD-gr	56.5132	120.95	-1.09775	0.00986378
254549_at	Glutathione S-transferase family protein	AT4G19880	AT4G19880	FG-SD-sp	FG-SD-gr	2864.59	6133.02	-1.09827	0.0395645
248200_at	ATOMT1 (O-METHYLTRANSFERASE 1); caffeate O-methyltransferase/ myricetin 3'-O-methyltransferase/ quercetin 3-O-methyltransferase	ATOMT1	AT5G54160	FG-SD-sp	FG-SD-gr	1698.16	3636.15	-1.09844	0.0542185
259792_at	CAD1 (constitutively activated cell death 1)	CAD1	AT1G29690	FG-SD-sp	FG-SD-gr	619.587	1328.26	-1.10016	0.011926
245148_at	putative pectinesterase/pectinesterase inhibitor 17	AT2G45220	AT2G45220	FG-SD-sp	FG-SD-gr	1683.95	3613.06	-1.10137	0.0471582
245809_at	XF1; squalene monooxygenase	XF1	AT1G58440	FG-SD-sp	FG-SD-gr	175.506	376.962	-1.1029	0.0498845
249746_at	TIP (TCV-INTERACTING PROTEIN); transcription coactivator/ transcription factor	TIP	AT5G24590	FG-SD-sp	FG-SD-gr	912.101	1961.21	-1.10448	0.0036519
260409_at	SHW1 (SHORT HYPOCOTYL IN WHITE LIGHT1)	SHW1	AT1G69935	FG-SD-sp	FG-SD-gr	254.178	546.771	-1.1051	0.00284599
250594_at	putative formin-like protein 21a	AT5G07760	AT5G07760	FG-SD-sp	FG-SD-gr	28.4436	61.2016	-1.10547	0.00799879
265029_at	ZFP7 (ZINC FINGER PROTEIN 7); nucleic acid binding / transcription factor/ zinc ion binding	ZFP7	AT1G24625	FG-SD-sp	FG-SD-gr	299.305	644.151	-1.10578	0.0335751
262284_at	nitrate-inducible, GARP-type transcriptional repressor 1-like protein	AT1G68670	AT1G68670	FG-SD-sp	FG-SD-gr	1630.77	3511.16	-1.1064	0.0312781
250934_at	chaperone DnaJ-domain containing protein	AT5G03030	AT5G03030	FG-SD-sp	FG-SD-gr	808.691	1741.3	-1.1065	0.0352152
249456_at	Saccharopine dehydrogenase	AT5G39410	AT5G39410	FG-SD-sp	FG-SD-gr	241.492	520.184	-1.10705	0.0159478
254243_at	protein kinase family protein	CRK13	AT4G23210	FG-SD-sp	FG-SD-gr	82.8367	178.476	-1.10739	0.0210044
246195_at	UBC17 (UBIQUITIN-CONJUGATING ENZYME 17); small conjugating protein ligase/ ubiquitin-protein ligase	UBC17	AT4G36410	FG-SD-sp	FG-SD-gr	69.7517	150.505	-1.10952	0.00763219
255899_at	RING/U-box superfamily protein	AT1G17970	AT1G17970	FG-SD-sp	FG-SD-gr	76.0166	164.291	-1.11187	0.00706886
253914_at	late embryogenesis abundant protein-like protein	AT4G27400	AT4G27400	FG-SD-sp	FG-SD-gr	31.6444	68.3955	-1.11195	0.0473703
245895_at	SRT2 (SIRTUIN 2); DNA binding / NAD or NADH binding / NAD-dependent histone deacetylase/ zinc ion binding	SRT2	AT5G09230	FG-SD-sp	FG-SD-gr	111.06	240.211	-1.11296	0.0273696
265471_at	peroxidase	AT2G37130	AT2G37130	FG-SD-sp	FG-SD-gr	2509.63	5437.95	-1.11559	0.0251211
253534_at	CYP83B1 (CYTOCHROME P450 MONOOXYGENASE 83B1); oxidoreductase, acting on paired donors, with incorporation or reduction of molecular oxygen, NADH or NADPH as one donor, and incorporation of one atom of oxygen / oxygen binding	CYP83B1	AT4G31500	FG-SD-sp	FG-SD-gr	2959.57	6413.31	-1.11568	0.0138108
254234_at	polyketide cyclase/dehydrase and lipid transport superfamily protein	AT4G23680	AT4G23680	FG-SD-sp	FG-SD-gr	173.615	376.869	-1.11817	0.0332858
254249_at	putative cysteine-rich receptor-like protein kinase 20	CRK20	AT4G23280	FG-SD-sp	FG-SD-gr	150.354	327.028	-1.12105	0.0466343
263548_at	CCR2 (COLD, CIRCADIAN RHYTHM, AND RNA BINDING 2); RNA binding / double-stranded DNA binding / single-stranded DNA binding	CCR2	AT2G21660	FG-SD-sp	FG-SD-gr	3459.05	7527.23	-1.12174	0.0449963
259137_at	putative calcium-binding protein CML49	AT3G10300	AT3G10300	FG-SD-sp	FG-SD-gr	1743.95	3795.16	-1.1218	0.00540758
248163_at	DFL1 (DWARF IN LIGHT 1); indole-3-acetic acid amido synthetase	DFL1	AT5G54510	FG-SD-sp	FG-SD-gr	486.44	1058.72	-1.12198	0.0522114
267587_at	DNAJ heat shock N-terminal domain-containing protein	AT2G42080	AT2G42080	FG-SD-sp	FG-SD-gr	153.105	333.337	-1.12246	0.0392998
260783_at	ORA59 (OCTADECANOID-RESPONSIVE ARABIDOPSIS AP2/ERF 59); DNA binding / transcription activator/ transcription factor	ORA59	AT1G06160	FG-SD-sp	FG-SD-gr	165.238	360.227	-1.12436	0.0430729
257522_at	yippee family putative zinc-binding protein	AT3G08990	AT3G08990	FG-SD-sp	FG-SD-gr	92.666	202.273	-1.12619	0.0321197
254204_at	lysophosphatidic acid acyltransferase	AT4G24160	AT4G24160	FG-SD-sp	FG-SD-gr	699.108	1528.19	-1.12824	0.0188188
264365_s_at	aspartyl protease-like protein /// aspartyl protease-like protein	AT1G03220 /// AT1G03230	AT1G03220 /// AT1G03230	FG-SD-sp	FG-SD-gr	3366.42	7389.1	-1.13418	0.0210046
262619_at	3-hydroxyisobutyryl-CoA hydrolase-like protein 5	AT1G06550	AT1G06550	FG-SD-sp	FG-SD-gr	170.416	374.221	-1.13483	0.0420766
251370_at	phosphoglycerate mutase family protein	AT3G60450	AT3G60450	FG-SD-sp	FG-SD-gr	469.082	1032.7	-1.13851	0.0544333
254432_at	FAD-binding Berberine family protein	AT4G20830	AT4G20830	FG-SD-sp	FG-SD-gr	2268.21	4996.48	-1.13936	0.0064775
249073_at	HAD superfamily, subfamily IIIB acid phosphatase	AT5G44020	AT5G44020	FG-SD-sp	FG-SD-gr	456.126	1004.8	-1.1394	0.0115994
266995_at	CYP710A1 (cytochrome P450, family 710, subfamily A, polypeptide 1); C-22 sterol desaturase/ oxygen binding	CYP710A1	AT2G34500	FG-SD-sp	FG-SD-gr	586.605	1292.64	-1.13986	0.0466349
261220_at	ER lumen protein retaining receptor	AT1G19970	AT1G19970	FG-SD-sp	FG-SD-gr	70.0639	154.453	-1.14042	0.0247975
261272_at	Mediator complex, subunit Med10	AT1G26665	AT1G26665	FG-SD-sp	FG-SD-gr	1575.93	3476.76	-1.14154	0.0341848
259014_at	O-Glycosyl hydrolases family 17 protein	AT3G07320	AT3G07320	FG-SD-sp	FG-SD-gr	37.1502	82.1635	-1.14513	0.0431218
260083_at	calcium-dependent lipid-binding domain-containing protein	AT1G63220	AT1G63220	FG-SD-sp	FG-SD-gr	81.1485	179.576	-1.14596	0.00500645
261923_at	AtUGT85A3 (UDP-glucosyl transferase 85A3); glucuronosyltransferase/ transcription factor/ transferase, transferring glycosyl groups	AtUGT85A3	AT1G22380	FG-SD-sp	FG-SD-gr	29.9588	66.306	-1.14616	0.0400774
253643_at	hypothetical protein	AT4G29780	AT4G29780	FG-SD-sp	FG-SD-gr	3479.6	7701.24	-1.14617	0.0173591
264787_at	ERD7 (EARLY-RESPONSIVE TO DEHYDRATION 7)	ERD7	AT2G17840	FG-SD-sp	FG-SD-gr	4706.84	10421.3	-1.1467	0.039474
260897_at	ERD2 (ENDOPLASMIC RETICULUM RETENTION DEFECTIVE 2); KDEL sequence binding / receptor	ERD2	AT1G29330	FG-SD-sp	FG-SD-gr	793.766	1758.24	-1.14735	0.026567
253631_at	GAE1 (UDP-D-GLUCURONATE 4-EPIMERASE 1); UDP-glucuronate 4-epimerase/ catalytic	GAE1	AT4G30440	FG-SD-sp	FG-SD-gr	1646.8	3651.44	-1.1488	0.0386586
260078_at	mitotic-spindle organizing protein 1A	AT1G73790	AT1G73790	FG-SD-sp	FG-SD-gr	339.657	753.407	-1.14935	0.0133396
267606_at	KCS11 (3-KETOACYL-COA SYNTHASE 11); acyltransferase/ catalytic/ transferase, transferring acyl groups other than amino-acyl groups	KCS11	AT2G26640	FG-SD-sp	FG-SD-gr	96.1156	213.332	-1.15026	0.0390939
262643_at	plant invertase/pectin methylesterase inhibitor domain-containing protein	AT1G62770	AT1G62770	FG-SD-sp	FG-SD-gr	69.5451	154.4	-1.15066	0.0271812
264052_at	CYP79B3; electron carrier/ heme binding / iron ion binding / monooxygenase/ oxygen binding	CYP79B3	AT2G22330	FG-SD-sp	FG-SD-gr	147.839	328.327	-1.1511	0.0412741
251281_at	AGP20	AGP20	AT3G61640	FG-SD-sp	FG-SD-gr	532.498	1184.44	-1.15335	0.00448995
252652_at	ADT4 (arogenate dehydratase 4); arogenate dehydratase/ prephenate dehydratase	ADT4	AT3G44720	FG-SD-sp	FG-SD-gr	1320.04	2936.37	-1.15345	0.0454083
253614_at	double Clp-N motif-containing P-loop nucleoside triphosphate hydrolases superfamily protein	AT4G30350	AT4G30350	FG-SD-sp	FG-SD-gr	1010.29	2248.54	-1.15422	0.0306116
259479_at	hypothetical protein	AT1G19020	AT1G19020	FG-SD-sp	FG-SD-gr	6740.31	15004.9	-1.15455	0.0394939
266600_at	MPK12 (MITOGEN-ACTIVATED PROTEIN KINASE 12); MAP kinase/ kinase	MPK12	AT2G46070	FG-SD-sp	FG-SD-gr	88.7813	197.677	-1.15482	0.0122451
258171_at	Acid phosphatase/vanadium-dependent haloperoxidase-related protein	AT3G21610	AT3G21610	FG-SD-sp	FG-SD-gr	790.794	1762.65	-1.15637	0.0226279
254878_at	AT-HSFB2B; transcription factor/ transcription repressor	AT-HSFB2B	AT4G11660	FG-SD-sp	FG-SD-gr	90.7069	202.273	-1.15702	0.0483794
257822_at	ROF1 (ROTAMASE FKBP 1); FK506 binding / calmodulin binding / peptidyl-prolyl cis-trans isomerase	ROF1	AT3G25230	FG-SD-sp	FG-SD-gr	306.658	684.325	-1.15805	0.0524934
266261_at	zinc finger A20 and AN1 domain-containing stress-associated protein 3	AT2G27580	AT2G27580	FG-SD-sp	FG-SD-gr	528.176	1179.02	-1.15849	0.0395037
245677_at	hypothetical protein	AT1G56660	AT1G56660	FG-SD-sp	FG-SD-gr	493.806	1103.96	-1.16067	0.0447499
262656_at	RING finger domain-containing protein	AT1G14200	AT1G14200	FG-SD-sp	FG-SD-gr	802.751	1796.87	-1.16246	0.0357681
247346_at	ATDGK2 (Diacylglycerol kinase 2); diacylglycerol kinase	ATDGK2	AT5G63770	FG-SD-sp	FG-SD-gr	306.839	687.074	-1.16298	0.00517763
264436_at	ERD9 (EARLY-RESPONSIVE TO DEHYDRATION 9); glutathione transferase	ERD9	AT1G10370	FG-SD-sp	FG-SD-gr	91.2702	204.521	-1.16404	0.0326983
259080_at	WNK1 (WITH NO LYSINE (K) 1); kinase/ protein kinase/ protein serine/threonine kinase	WNK1	AT3G04910	FG-SD-sp	FG-SD-gr	936.859	2101.17	-1.16529	0.0107594
265691_at	hypothetical protein	AT2G24330	AT2G24330	FG-SD-sp	FG-SD-gr	384.314	862.374	-1.16603	0.0354137
245906_at	hypothetical protein	AT5G11070	AT5G11070	FG-SD-sp	FG-SD-gr	2339.68	5262	-1.1693	0.0347158
263722_at	GONST1 (Golgi Nucleotide Sugar Transporter 1); GDP-mannose transmembrane transporter/ nucleotide-sugar transmembrane transporter	GONST1	AT2G13650	FG-SD-sp	FG-SD-gr	684.063	1539.18	-1.16996	0.00540015
246779_at	PNC2 (PEROXISOMAL ADENINE NUCLEOTIDE CARRIER 2); ADP transmembrane transporter/ ATP transmembrane transporter/ binding	PNC2	AT5G27520	FG-SD-sp	FG-SD-gr	1426.28	3210.7	-1.17063	0.0473563
247328_at	cAMP-regulated phosphoprotein 19-related protein	AT5G64130	AT5G64130	FG-SD-sp	FG-SD-gr	1253.17	2821.05	-1.17065	0.0434384
247874_at	protein SUPPRESSOR OF MAX2 1	AT5G57710	AT5G57710	FG-SD-sp	FG-SD-gr	527.035	1188.27	-1.17289	0.0392575
259480_at	hypothetical protein	AT1G19010	AT1G19010	FG-SD-sp	FG-SD-gr	162.306	365.96	-1.17297	0.0212281
249839_at	high mobility group B protein 12	AT5G23405	AT5G23405	FG-SD-sp	FG-SD-gr	454.167	1025.03	-1.17437	0.0102239
251906_at	ATCHX20 (CATION/H+ EXCHANGER 20); monovalent cation:proton antiporter/ sodium:hydrogen antiporter	ATCHX20	AT3G53720	FG-SD-sp	FG-SD-gr	109.518	247.205	-1.17454	0.0388502
262933_at	ATPAO4 (ARABIDOPSIS THALIANA POLYAMINE OXIDASE 4); amine oxidase/ polyamine oxidase	ATPAO4	AT1G65840	FG-SD-sp	FG-SD-gr	256.417	579.001	-1.17507	0.00578653
256818_at	oxidoreductase, 2OG-Fe(II) oxygenase family protein	AT3G21420	AT3G21420	FG-SD-sp	FG-SD-gr	107.118	241.993	-1.17577	0.0505224
261609_at	PI-PLC X domain-containing protein	AT1G49740	AT1G49740	FG-SD-sp	FG-SD-gr	151.656	342.77	-1.17644	0.0113941
251324_at	PIP1A (PLASMA MEMBRANE INTRINSIC PROTEIN 1A); water channel	PIP1A	AT3G61430	FG-SD-sp	FG-SD-gr	3656.13	8270.87	-1.17772	0.0209084
245740_at	AAP5; amino acid transmembrane transporter/ basic amino acid transmembrane transporter	AAP5	AT1G44100	FG-SD-sp	FG-SD-gr	476.704	1078.57	-1.17796	0.0248772
253666_at	MERI5B (meristem-5); hydrolase, acting on glycosyl bonds / xyloglucan:xyloglucosyl transferase	MERI5B	AT4G30270	FG-SD-sp	FG-SD-gr	11938.9	27020.1	-1.17836	0.0370988
251766_at	yippee family putative zinc-binding protein /// hypothetical protein	AT3G55890 /// AT3G55910	AT3G55910	FG-SD-sp	FG-SD-gr	311.006	703.948	-1.17853	0.0135069
251590_at	AGP23 (ARABINOGALACTAN-PROTEIN 23)	AGP23	AT3G57690	FG-SD-sp	FG-SD-gr	134.987	305.796	-1.17975	0.0520078
253925_at	SHV3 (SHAVEN 3); glycerophosphodiester phosphodiesterase/ kinase	SHV3	AT4G26690	FG-SD-sp	FG-SD-gr	414.298	941.459	-1.18423	0.0221475
261575_at	hypothetical protein	AT1G01130	AT1G01130	FG-SD-sp	FG-SD-gr	225.152	511.851	-1.18482	0.0515018
264521_at	hypothetical protein	AT1G10020	AT1G10020	FG-SD-sp	FG-SD-gr	109.029	247.869	-1.18487	0.0514781
260297_at	alpha/beta-Hydrolases superfamily protein	AT1G80280	AT1G80280	FG-SD-sp	FG-SD-gr	61.6883	140.326	-1.18571	0.0165682
262868_at	putative nucleotide-diphospho-sugar transferase	AT1G64980	AT1G64980	FG-SD-sp	FG-SD-gr	168.232	383.305	-1.18804	0.0289667
256499_at	hypothetical protein	AT1G36640	AT1G36640	FG-SD-sp	FG-SD-gr	78.9732	180.374	-1.19155	0.0453502
259120_at	root meristem growth factor 7	RGF7	AT3G02240	FG-SD-sp	FG-SD-gr	50.6895	115.934	-1.19354	0.0347299
253113_at	senescence/dehydration-associated protein	AT4G35985	AT4G35985	FG-SD-sp	FG-SD-gr	837.65	1918.05	-1.19522	0.0255137
245749_at	hypothetical protein	AT1G51090	AT1G51090	FG-SD-sp	FG-SD-gr	423.43	970.376	-1.19642	0.0113791
244906_at	unknown protein	ORF240A	ATMG00690	FG-SD-sp	FG-SD-gr	104.779	240.298	-1.19748	0.0460363
251293_at	hypothetical protein	AT3G61930	AT3G61930	FG-SD-sp	FG-SD-gr	1253.06	2878.01	-1.19962	0.00753623
250669_at	PGIP2 (POLYGALACTURONASE INHIBITING PROTEIN 2); protein binding	PGIP2	AT5G06870	FG-SD-sp	FG-SD-gr	908.3	2094.03	-1.20504	0.00467148
265629_at	LHW (LONESOME HIGHWAY); protein homodimerization/ transcription activator/ transcription factor	LHW	AT2G27228 /// AT2G27230	FG-SD-sp	FG-SD-gr	207.019	477.363	-1.20532	0.00179389
252320_at	probable xyloglucan endotransglucosylase/hydrolase 11	XTH11	AT3G48580	FG-SD-sp	FG-SD-gr	206.679	476.624	-1.20546	0.040515
245292_at	extradiol ring-cleavage dioxygenase	AT4G15093	AT4G15093	FG-SD-sp	FG-SD-gr	310.639	716.625	-1.20598	0.0287792
260360_at	CM3 (chorismate mutase 3); chorismate mutase	CM3	AT1G69370	FG-SD-sp	FG-SD-gr	208.531	481.203	-1.20638	0.0353918
246529_at	probable leucine-rich repeat receptor-like serine/threonine-protein kinase	AT5G15730	AT5G15730	FG-SD-sp	FG-SD-gr	717.65	1658.05	-1.20814	0.0324511
247455_at	MYB96 (myb domain protein 96); DNA binding / transcription factor	MYB96	AT5G62470	FG-SD-sp	FG-SD-gr	508.375	1175.08	-1.2088	0.0531667
265679_at	hypothetical protein /// hypothetical protein	AT2G32235 /// AT2G32240	AT2G32235 /// AT2G32240	FG-SD-sp	FG-SD-gr	1492.58	3451	-1.20921	0.00767953
252487_at	UGT76E12 (UDP-GLUCOSYL TRANSFERASE 76E12); UDP-glycosyltransferase/ quercetin 3-O-glucosyltransferase/ quercetin 7-O-glucosyltransferase/ transferase, transferring glycosyl groups	UGT76E12	AT3G46660	FG-SD-sp	FG-SD-gr	335.831	776.524	-1.2093	0.0397806
246015_at	peptidyl-tRNA hydrolase II (PTH2) family protein	AT5G10700	AT5G10700	FG-SD-sp	FG-SD-gr	298.953	692.714	-1.21234	0.015537
255430_at	tic20-IV (TRANSLOCON AT THE INNER ENVELOPE MEMBRANE OF CHLOROPLASTS 20-IV)	tic20-IV	AT4G03320	FG-SD-sp	FG-SD-gr	1282.07	2974.06	-1.21396	0.00540143
258617_at	putative calcium-binding protein CML18	AT3G03000	AT3G03000	FG-SD-sp	FG-SD-gr	338.177	785.745	-1.21628	0.0115873
261826_at	PMEPCRA (METHYLESTERASE PCR A); enzyme inhibitor/ pectinesterase	PMEPCRA	AT1G11580	FG-SD-sp	FG-SD-gr	258.704	601.56	-1.21741	0.0456991
249197_at	CML37 (CALMODULIN LIKE 37); calcium ion binding	CML37	AT5G42380	FG-SD-sp	FG-SD-gr	269.529	628.107	-1.22057	0.0466209
254343_at	APR3 (APS REDUCTASE 3); adenylyl-sulfate reductase	42828	AT4G21990	FG-SD-sp	FG-SD-gr	106.7	249.18	-1.22363	0.0379423
245824_at	ATPUP17; purine transmembrane transporter	ATPUP17	AT1G57943	FG-SD-sp	FG-SD-gr	63.3262	147.939	-1.22413	0.0544069
267364_at	ELF4 (EARLY FLOWERING 4)	ELF4	AT2G40080	FG-SD-sp	FG-SD-gr	164.832	385.299	-1.22499	0.0372986
258662_at	hypothetical protein	AT3G02900	AT3G02900	FG-SD-sp	FG-SD-gr	410.171	959.149	-1.22553	0.00655192
265740_at	RHA2B (RING-H2 FINGER PROTEIN 2B); protein binding / ubiquitin-protein ligase/ zinc ion binding	RHA2B	AT2G01150	FG-SD-sp	FG-SD-gr	148.374	347.238	-1.22669	0.00878995
266749_at	Pto-interacting 1-4	AT2G47060	AT2G47060	FG-SD-sp	FG-SD-gr	602.333	1410.57	-1.22764	0.0392174
250055_at	ATCBR (ARABIDOPSIS THALIANA NADH:CYTOCHROME B5 REDUCTASE 1); cytochrome-b5 reductase	ATCBR	AT5G17770	FG-SD-sp	FG-SD-gr	1584.15	3711.45	-1.22827	0.011985
261365_at	putative proton pump interactor protein	AT1G53110	AT1G53110	FG-SD-sp	FG-SD-gr	97.265	227.923	-1.22855	0.0310527
248582_at	CPHSC70-2EAT SHOCK PROTEIN 70-2 (CHLOROPLAST HEAT SHOCK PROTEIN 70-2); ATP binding / unfolded protein binding	CPHSC70-2EAT SHOCK PROTEIN 70-2	AT5G49910	FG-SD-sp	FG-SD-gr	509.004	1193.09	-1.22895	0.0542906
257540_at	DUF679 domain membrane protein 1	DMP1	AT3G21520	FG-SD-sp	FG-SD-gr	853.755	2002.27	-1.22974	0.0157615
252131_at	BCS1 (CYTOCHROME BC1 SYNTHESIS); ATP binding / ATPase/ nucleoside-triphosphatase/ nucleotide binding	BCS1	AT3G50930	FG-SD-sp	FG-SD-gr	832.331	1953.72	-1.231	0.0541439
256576_at	PMZ; zinc ion binding	PMZ	AT3G28210	FG-SD-sp	FG-SD-gr	412.547	968.826	-1.23168	0.0072355
249965_at	mitochondrial editing factor 18	MEF18	AT5G19020	FG-SD-sp	FG-SD-gr	31.1846	73.2414	-1.23183	0.0170545
264635_at	hypothetical protein	AT1G65500	AT1G65500	FG-SD-sp	FG-SD-gr	1980.61	4661.66	-1.2349	0.00934833
253842_at	vacuolar iron transporter-like protein	AT4G27860	AT4G27860	FG-SD-sp	FG-SD-gr	107.174	252.33	-1.23535	0.0054983
259859_at	putative protein phosphatase 2C 15	AT1G68410	AT1G68410	FG-SD-sp	FG-SD-gr	484.512	1144.1	-1.2396	0.0495984
247996_at	LORELEI-LIKE-GPI-ANCHORED PROTEIN 1	LLG1	AT5G56170	FG-SD-sp	FG-SD-gr	1541.97	3642.61	-1.2402	0.0449186
251300_at	serine protease inhibitor, Kazal-type family protein	AT3G61980	AT3G61980	FG-SD-sp	FG-SD-gr	866.281	2047.95	-1.24128	0.0286362
251683_at	protein kinase family protein	AT3G57120	AT3G57120	FG-SD-sp	FG-SD-gr	119.902	283.909	-1.24358	0.0347188
248142_at	DNA-binding bromodomain-containing protein	AT5G55040	AT5G55040	FG-SD-sp	FG-SD-gr	253.809	601.118	-1.2439	0.0384217
265670_s_at	hypothetical protein /// hypothetical protein	AT2G32190 /// AT2G32210	AT2G32190 /// AT2G32210	FG-SD-sp	FG-SD-gr	1458.78	3457.37	-1.24491	0.00727046
251803_at	PIF / Ping-Pong family of plant transposase	AT3G55350	AT3G55350	FG-SD-sp	FG-SD-gr	19.1128	45.2997	-1.24496	0.0619063
259842_at	CPuORF32 (Conserved peptide upstream open reading frame 32)	CPuORF32	AT1G73600 /// AT1G73602	FG-SD-sp	FG-SD-gr	348.359	825.817	-1.24525	0.0199669
249527_at	proline dehydrogenase 2	AT5G38710	AT5G38710	FG-SD-sp	FG-SD-gr	1203.99	2856.22	-1.24628	0.0486081
266834_s_at	putative protein phosphatase 2C 25 /// putative protein phosphatase 2C-like protein 45 /// putative protein phosphatase 2C 53	AT2G30020 /// AT3G27140 /// AT4G08260	AT2G30020 /// AT3G27140 /// AT4G08260	FG-SD-sp	FG-SD-gr	2647.8	6294.7	-1.24934	0.0308765
257071_at	ATCSLC04 (CELLULOSE-SYNTHASE LIKE C4); cellulose synthase/ transferase, transferring glycosyl groups	ATCSLC04	AT3G28180	FG-SD-sp	FG-SD-gr	261.636	622.892	-1.25142	0.0467472
266626_at	ubiquitin-like protein	AT2G35360	AT2G35360	FG-SD-sp	FG-SD-gr	75.29	179.314	-1.25196	0.00522776
260429_at	JAZ6 (JASMONATE-ZIM-DOMAIN PROTEIN 6)	JAZ6	AT1G72450	FG-SD-sp	FG-SD-gr	2537.88	6044.81	-1.25207	0.0187291
246702_at	Cytidine/deoxycytidylate deaminase family protein	AT5G28050	AT5G28050	FG-SD-sp	FG-SD-gr	5532.5	13193.3	-1.25381	0.0521498
259642_at	BSD domain-containing protein	AT1G69030	AT1G69030	FG-SD-sp	FG-SD-gr	165.559	394.968	-1.25439	0.0166954
267093_at	CAX1 (cation exchanger 1); calcium ion transmembrane transporter/ calcium:cation antiporter/ calcium:hydrogen antiporter	CAX1	AT2G38170	FG-SD-sp	FG-SD-gr	3415.46	8156.57	-1.25588	0.0406891
256787_at	ATBFRUCT1; beta-fructofuranosidase/ hydrolase, hydrolyzing O-glycosyl compounds	ATBFRUCT1	AT3G13790	FG-SD-sp	FG-SD-gr	1635.56	3910.36	-1.25752	0.0213215
259110_at	hypothetical protein	AT3G05570	AT3G05570	FG-SD-sp	FG-SD-gr	264.06	631.979	-1.25901	0.00381552
245393_at	putative beta-1,3-endoglucanase	AT4G16260	AT4G16260	FG-SD-sp	FG-SD-gr	8556.23	20491.6	-1.25998	0.029014
256527_at	probable thionin-2.4	AT1G66100	AT1G66100	FG-SD-sp	FG-SD-gr	40.3259	96.6668	-1.26131	0.0174957
253131_at	WOX13 (WUSCHEL-RELATED HOMEOBOX 13); DNA binding / transcription factor	WOX13	AT4G35550	FG-SD-sp	FG-SD-gr	105.574	253.261	-1.26237	0.031976
260741_at	putative glutamine amidotransferase	AT1G15040	AT1G15040	FG-SD-sp	FG-SD-gr	1098.84	2637.23	-1.26304	0.00537781
253830_at	hypothetical protein	AT4G27652	AT4G27652	FG-SD-sp	FG-SD-gr	3059.14	7342.9	-1.26323	0.0124878
249178_at	SCP2 (STEROL CARRIER PROTEIN 2); oxidoreductase/ sterol carrier	SCP2	AT5G42890	FG-SD-sp	FG-SD-gr	1163.18	2793.6	-1.26405	0.03929
248524_s_at	squamosa promoter-binding-like protein 13 /// squamosa promoter-binding-like protein 13	AT5G50570 /// AT5G50670	AT5G50570 /// AT5G50670	FG-SD-sp	FG-SD-gr	1539.9	3703.47	-1.26604	0.00806497
247186_at	O-fucosyltransferase family protein	AT5G65470	AT5G65470	FG-SD-sp	FG-SD-gr	324.501	780.544	-1.26625	0.0466213
245832_at	EMB1144 (embryo defective 1144); chorismate synthase	EMB1144	AT1G48850	FG-SD-sp	FG-SD-gr	1167.44	2808.28	-1.26634	0.0279927
260109_at	TET10 (TETRASPANIN10)	TET10	AT1G63260	FG-SD-sp	FG-SD-gr	113.926	274.231	-1.26729	0.00679907
252679_at	putative CCR4-associated factor 1	AT3G44260	AT3G44260	FG-SD-sp	FG-SD-gr	2380.33	5769.9	-1.27738	0.0363017
257173_at	SAHH2 (S-ADENOSYL-L-HOMOCYSTEINE (SAH) HYDROLASE 2); adenosylhomocysteinase/ binding / catalytic	SAHH2	AT3G23810	FG-SD-sp	FG-SD-gr	146.654	355.786	-1.2786	0.0147411
255647_at	ECA2 (ER-TYPE CA2+-ATPASE 2); calcium-transporting ATPase	ECA2	AT4G00900	FG-SD-sp	FG-SD-gr	215.701	523.542	-1.27928	0.040176
260392_at	enolase 1	ENO1	AT1G74030	FG-SD-sp	FG-SD-gr	153.542	372.778	-1.27969	0.0338
263783_at	WRKY46; transcription factor	WRKY46	AT2G46400	FG-SD-sp	FG-SD-gr	580.63	1410.77	-1.28079	0.041818
257264_at	Receptor-like protein kinase-related family protein	AT3G22060	AT3G22060	FG-SD-sp	FG-SD-gr	891.654	2172.69	-1.28493	0.0154906
253162_at	PSAT; O-phospho-L-serine:2-oxoglutarate aminotransferase	PSAT	AT4G35630	FG-SD-sp	FG-SD-gr	1340.37	3268.16	-1.28584	0.0204377
248865_at	abscisic acid receptor PYL1	PYL1	AT5G46790	FG-SD-sp	FG-SD-gr	185.783	453.112	-1.28625	0.0073923
267536_at	PLDBETA1 (PHOSPHOLIPASE D BETA 1); phospholipase D	PLDBETA1	AT2G42010	FG-SD-sp	FG-SD-gr	325.666	794.71	-1.28703	0.00810741
255230_at	ATRFNR1 (ROOT FNR 1); FAD binding / NADP or NADPH binding / electron carrier/ ferredoxin-NADP+ reductase/ oxidoreductase	ATRFNR1	AT4G05390	FG-SD-sp	FG-SD-gr	253.138	618.254	-1.28827	0.0417096
249719_at	putative auxin-responsive protein	AT5G35735	AT5G35735	FG-SD-sp	FG-SD-gr	4288.58	10477	-1.28866	0.0415538
254085_at	ATHVA22D	HVA22D	AT4G24960	FG-SD-sp	FG-SD-gr	755.941	1849.02	-1.29042	0.00407033
258047_at	4CL2 (4-COUMARATE:COA LIGASE 2); 4-coumarate-CoA ligase	4CL2	AT3G21240	FG-SD-sp	FG-SD-gr	188.908	462.293	-1.29113	0.0121105
266658_at	hypothetical protein	AT2G25735	AT2G25735	FG-SD-sp	FG-SD-gr	1904.64	4665.71	-1.29258	0.0395489
261688_at	putative protein phosphatase 2C 12	AT1G47380	AT1G47380	FG-SD-sp	FG-SD-gr	76.9566	188.628	-1.29343	0.0277265
250252_at	ZIFL1 (ZINC INDUCED FACILITATOR-like 1); tetracycline:hydrogen antiporter	ZIFL1	AT5G13750	FG-SD-sp	FG-SD-gr	609.088	1493.3	-1.29378	0.0488526
254387_at	methionine sulfoxide reductase domain-containing protein / SeIR domain-containing protein	ATMSRB9	AT4G21850	FG-SD-sp	FG-SD-gr	516.814	1269.45	-1.29649	0.0104488
263096_at	AHB1 (ARABIDOPSIS HEMOGLOBIN 1); oxygen binding / oxygen transporter	AHB1	AT2G16060	FG-SD-sp	FG-SD-gr	316.087	776.788	-1.2972	0.0143834
245082_at	hypothetical protein	AT2G23270	AT2G23270	FG-SD-sp	FG-SD-gr	240.502	591.535	-1.29842	0.0206348
263800_at	Ankyrin repeat family protein	AT2G24600	AT2G24600	FG-SD-sp	FG-SD-gr	799.365	1968.64	-1.30027	0.0158458
265796_at	heavy-metal-associated domain-containing protein	AT2G35730	AT2G35730	FG-SD-sp	FG-SD-gr	763.326	1881.74	-1.3017	0.0111951
250053_at	Sodium/calcium exchanger family protein	AT5G17850	AT5G17850	FG-SD-sp	FG-SD-gr	552.217	1361.41	-1.3018	0.0217424
251735_at	ATFER3 (ferritin 3); binding / ferric iron binding / oxidoreductase/ transition metal ion binding	ATFER3	AT3G56090	FG-SD-sp	FG-SD-gr	254.968	629.304	-1.30344	0.00489804
247866_at	XTR3 (XYLOGLUCAN ENDOTRANSGLYCOSYLASE 3); hydrolase, acting on glycosyl bonds / xyloglucan:xyloglucosyl transferase	XTR3	AT5G57550	FG-SD-sp	FG-SD-gr	172.08	424.725	-1.30345	0.00818221
262382_at	Toll-Interleukin-Resistance domain-containing protein	AT1G72920	AT1G72920	FG-SD-sp	FG-SD-gr	109.924	271.448	-1.30418	0.0484789
248466_at	ATHVA22E	HVA22E	AT5G50720	FG-SD-sp	FG-SD-gr	122.733	303.105	-1.3043	0.0449528
261135_at	PDF1.4	PDF1.4	AT1G19610	FG-SD-sp	FG-SD-gr	1379.22	3409.15	-1.30556	0.0319699
250646_at	peroxidase 53	PA2	AT5G06720	FG-SD-sp	FG-SD-gr	38.5303	95.553	-1.31031	0.0491204
254385_s_at	methionine sulfoxide reductase domain-containing protein / SeIR domain-containing protein	ATMSRB7	AT4G21830 /// AT4G21840	FG-SD-sp	FG-SD-gr	149.214	370.109	-1.31057	0.0346269
262525_at	CYP72C1 (CYTOCHROME P450 72C1); electron carrier/ heme binding / iron ion binding / monooxygenase/ oxygen binding	CYP72C1	AT1G17060	FG-SD-sp	FG-SD-gr	42.3634	105.191	-1.31213	0.0190513
250018_at	Methyltransferase-related protein	AT5G18150	AT5G18150	FG-SD-sp	FG-SD-gr	1120.63	2784.87	-1.3133	0.0248996
260327_at	RING/U-box domain-containing protein	AT1G63840	AT1G63840	FG-SD-sp	FG-SD-gr	1835.41	4569.79	-1.31602	0.0050814
259875_s_at	OPR1; 12-oxophytodienoate reductase	OPR1	AT1G76680 /// AT1G76690	FG-SD-sp	FG-SD-gr	663.672	1655.32	-1.31856	0.0135303
248424_at	hydroxyproline-rich glycoprotein family protein	AT5G51680	AT5G51680	FG-SD-sp	FG-SD-gr	159.39	397.834	-1.3196	0.0269641
253551_at	hypothetical protein	AT4G30996	AT4G30996	FG-SD-sp	FG-SD-gr	515.349	1287.03	-1.32043	0.044048
245629_at	protein SMALLER WITH VARIABLE BRANCHES	SVB	AT1G56580	FG-SD-sp	FG-SD-gr	361.708	905.7	-1.32421	0.052669
258699_at	major facilitator superfamily protein	AT3G09470	AT3G09470	FG-SD-sp	FG-SD-gr	430.633	1080.88	-1.32767	0.0356658
248153_at	ATCNGC4 (CYCLIC NUCLEOTIDE-GATED CATION CHANNEL 4); calmodulin binding / cation channel/ cation transmembrane transporter/ cyclic nucleotide binding	ATCNGC4	AT5G54250	FG-SD-sp	FG-SD-gr	313.069	787.87	-1.33148	0.0228205
257785_at	MUB4 (MEMBRANE-ANCHORED UBIQUITIN-FOLD PROTEIN 4 PRECURSOR)	MUB4	AT3G26980	FG-SD-sp	FG-SD-gr	492.206	1242.58	-1.336	0.00260886
267393_at	O-fucosyltransferase family protein	AT2G44500	AT2G44500	FG-SD-sp	FG-SD-gr	961.149	2430.13	-1.3382	0.0227828
252958_at	MYB4; DNA binding / transcription factor	MYB4	AT4G38620	FG-SD-sp	FG-SD-gr	62.1461	157.218	-1.33903	0.00239575
264229_at	F-box/kelch-repeat protein	AT1G67480	AT1G67480	FG-SD-sp	FG-SD-gr	295.026	746.68	-1.33965	0.0198505
264901_at	AST91 (SULFATE TRANSPORTER 91); sulfate transmembrane transporter	AST91	AT1G23090	FG-SD-sp	FG-SD-gr	681.626	1727.06	-1.34126	0.0481995
266269_at	ATGSTU2 (ARABIDOPSIS THALIANA GLUTATHIONE S-TRANSFERASE TAU 2); glutathione transferase	ATGSTU2	AT2G29480	FG-SD-sp	FG-SD-gr	128.145	325.119	-1.34319	0.0429878
259134_at	hypothetical protein	AT3G05390	AT3G05390	FG-SD-sp	FG-SD-gr	72.2051	183.26	-1.34372	0.0336855
254027_at	AAA-type ATPase family protein	AT4G25835	AT4G25835	FG-SD-sp	FG-SD-gr	31.6756	80.5113	-1.34582	0.0312032
255900_at	hypothetical protein	AT1G17830	AT1G17830	FG-SD-sp	FG-SD-gr	69.342	176.28	-1.34607	0.0274579
257519_at	RNA recognition motif-containing protein	AT3G01210	AT3G01210	FG-SD-sp	FG-SD-gr	168.034	427.55	-1.34734	0.0174601
250512_at	hypothetical protein	AT5G09995	AT5G09995	FG-SD-sp	FG-SD-gr	83.6414	212.948	-1.34821	0.0042227
262615_at	ELF5A-1 (EUKARYOTIC ELONGATION FACTOR 5A-1); translation initiation factor	ELF5A-1	AT1G13950	FG-SD-sp	FG-SD-gr	149.976	382.634	-1.35123	0.0061741
264512_at	hypothetical protein	AT1G09575	AT1G09575	FG-SD-sp	FG-SD-gr	202.604	517.244	-1.35218	0.0138732
266447_at	MSS3 (multicopy suppressors of snf4 deficiency in yeast 3); calcium ion binding	MSS3	AT2G43290	FG-SD-sp	FG-SD-gr	1527.63	3900.46	-1.35235	0.0437322
266295_at	TUB7; structural constituent of cytoskeleton	TUB7	AT2G29550	FG-SD-sp	FG-SD-gr	59.6498	152.376	-1.35305	0.0369079
257365_x_at	PDF1.2b (plant defensin 1.2b)	PDF1.2b	AT2G26020	FG-SD-sp	FG-SD-gr	3449.03	8814.95	-1.35376	0.0466501
260367_at	hypothetical protein	AT1G69760	AT1G69760	FG-SD-sp	FG-SD-gr	262.885	673.268	-1.35675	0.0136801
261926_at	PATL2 (PATELLIN 2); transporter	PATL2	AT1G22530	FG-SD-sp	FG-SD-gr	625.174	1605.82	-1.36098	0.00595461
245252_at	ATERF-1 (ETHYLENE RESPONSIVE ELEMENT BINDING FACTOR 1); DNA binding / transcription activator/ transcription factor	ATERF-1	AT4G17500	FG-SD-sp	FG-SD-gr	1363.24	3504.25	-1.36206	0.00718641
253478_at	regulator of Vps4 activity protein	AT4G32350	AT4G32350	FG-SD-sp	FG-SD-gr	124.562	320.562	-1.36374	0.0483365
250189_at	hypothetical protein	AT5G14410	AT5G14410	FG-SD-sp	FG-SD-gr	138.35	356.312	-1.36482	0.020638
257824_at	auxin-responsive family protein	AT3G25290	AT3G25290	FG-SD-sp	FG-SD-gr	554.297	1430.32	-1.3676	0.0413983
246216_at	ROT3 (ROTUNDIFOLIA 3); oxidoreductase, acting on paired donors, with incorporation or reduction of molecular oxygen, NADH or NADPH as one donor, and incorporation of one atom of oxygen / oxygen binding / steroid hydroxylase	ROT3	AT4G36380	FG-SD-sp	FG-SD-gr	63.5112	163.973	-1.36838	0.01106
257784_at	MUB4 (MEMBRANE-ANCHORED UBIQUITIN-FOLD PROTEIN 4 PRECURSOR)	MUB4	AT3G26980	FG-SD-sp	FG-SD-gr	797.307	2060.16	-1.36955	0.0315293
246785_at	GSH2 (GLUTATHIONE SYNTHETASE 2); glutathione synthase	GSH2	AT5G27380	FG-SD-sp	FG-SD-gr	1543.09	3994.39	-1.37215	0.00758681
260536_at	ETFQO (electron-transfer flavoprotein:ubiquinone oxidoreductase); catalytic/ electron carrier/ electron-transferring-flavoprotein dehydrogenase	ETFQO	AT2G43400	FG-SD-sp	FG-SD-gr	777.975	2016.57	-1.37411	0.0331655
265737_at	ATPAP1 (PHOSPHATIDIC ACID PHOSPHATASE 1); phosphatidate phosphatase	ATPAP1	AT2G01180	FG-SD-sp	FG-SD-gr	1253.91	3253.49	-1.37556	0.0505803
247292_at	pumilio homolog 26	AT5G64490	AT5G64490	FG-SD-sp	FG-SD-gr	52.489	136.307	-1.37677	0.00559056
262211_at	ORA47; DNA binding / transcription factor	ORA47	AT1G74930	FG-SD-sp	FG-SD-gr	516.745	1342.69	-1.3776	0.00799628
252231_at	hypothetical protein	AT3G49720	AT3G49720	FG-SD-sp	FG-SD-gr	658.784	1712.15	-1.37793	0.0111144
263137_at	gamma-glutamyl hydrolase, putative / gamma-Glu-X carboxypeptidase, putative / conjugase, putative	ATGGH1	AT1G78660	FG-SD-sp	FG-SD-gr	454.116	1181.13	-1.37904	0.0190086
263482_at	GDSL esterase/lipase	AT2G03980	AT2G03980	FG-SD-sp	FG-SD-gr	804.654	2095.01	-1.38051	0.00306012
253270_at	CYCD3;1 (CYCLIN D3;1); cyclin-dependent protein kinase regulator/ protein binding	CYCD3;1	AT4G34160	FG-SD-sp	FG-SD-gr	91.9013	239.655	-1.3828	0.00660521
266805_at	protein trichome birefringence-like 45	TBL45	AT2G30010	FG-SD-sp	FG-SD-gr	239.907	625.816	-1.38327	0.00259435
260744_at	hypothetical protein	AT1G15010	AT1G15010	FG-SD-sp	FG-SD-gr	3838.88	10078.8	-1.39256	0.0162503
253919_at	hypothetical protein	AT4G27350	AT4G27350	FG-SD-sp	FG-SD-gr	139.693	366.789	-1.39269	0.0329675
253104_at	pathogenesis-related thaumatin family protein	AT4G36010	AT4G36010	FG-SD-sp	FG-SD-gr	699.148	1847.02	-1.40153	0.0197676
246155_at	plant Tudor-like RNA-binding protein	AT5G20030	AT5G20030	FG-SD-sp	FG-SD-gr	70.1078	185.251	-1.40183	0.0339009
252265_at	DIN11 (DARK INDUCIBLE 11); iron ion binding / oxidoreductase	DIN11	AT3G49620	FG-SD-sp	FG-SD-gr	4098.92	10837.7	-1.40274	0.039002
253215_at	major facilitator family protein	AT4G34950	AT4G34950	FG-SD-sp	FG-SD-gr	534.14	1415.04	-1.40555	0.0300232
251478_at	IQD13 (IQ-domain 13); calmodulin binding	IQD13	AT3G59690	FG-SD-sp	FG-SD-gr	183.029	485	-1.40591	0.0139924
254190_at	hypothetical protein	AT4G23885	AT4G23885	FG-SD-sp	FG-SD-gr	665.967	1764.82	-1.406	0.0159009
245334_at	RALFL33 (ralf-like 33); signal transducer	RALFL33	AT4G15800	FG-SD-sp	FG-SD-gr	2113.58	5606.41	-1.40739	0.0247526
251920_at	uracil phosphoribosyltransferase	UPP	AT3G53900	FG-SD-sp	FG-SD-gr	68.5135	181.756	-1.40754	0.0401448
264153_at	ATPP2-A5 (ARABIDOPSIS THALIANA PHLOEM PROTEIN 2 A5); carbohydrate binding	ATPP2-A5	AT1G65390	FG-SD-sp	FG-SD-gr	31.7823	84.3366	-1.40794	0.00890765
256457_at	DNA glycosylase superfamily protein	AT1G75230	AT1G75230	FG-SD-sp	FG-SD-gr	315.973	839.279	-1.40935	0.0387107
265200_s_at	UGT73C6 (UDP-glucosyl transferase 73C6); UDP-glucosyltransferase/ UDP-glycosyltransferase/ quercetin 3-O-glucosyltransferase/ quercetin 4'-O-glucosyltransferase/ quercetin 7-O-glucosyltransferase/ transferase, transferring glycosyl groups	UGT73C6	AT2G36790 /// AT2G36800	FG-SD-sp	FG-SD-gr	563.092	1497.61	-1.41122	0.00722509
258356_at	hypothetical protein	AT3G14340	AT3G14340	FG-SD-sp	FG-SD-gr	68.078	181.369	-1.41367	0.0490021
247706_at	Haloacid dehalogenase-like hydrolase (HAD) superfamily protein	AT5G59480	AT5G59480	FG-SD-sp	FG-SD-gr	236.529	633.377	-1.42105	0.000210313
263591_at	ATMAP65-6; microtubule binding	ATMAP65-6	AT2G01910	FG-SD-sp	FG-SD-gr	133.6	358.483	-1.42398	0.0519083
267518_at	Kinase interacting (KIP1-like) family protein	AT2G30500	AT2G30500	FG-SD-sp	FG-SD-gr	430.892	1157.68	-1.42584	0.0161184
254624_at	hypothetical protein	AT4G18580	AT4G18580	FG-SD-sp	FG-SD-gr	374.392	1007.14	-1.42765	0.0472683
260423_at	ATEXO70D1 (exocyst subunit EXO70 family protein D1); protein binding	ATEXO70D1	AT1G72470	FG-SD-sp	FG-SD-gr	42.4594	114.258	-1.42815	0.0134757
253492_at	ATP-dependent caseinolytic (Clp) protease/crotonase family protein	AT4G31810	AT4G31810	FG-SD-sp	FG-SD-gr	55.817	150.32	-1.42926	0.0102837
256017_at	JAZ1 (JASMONATE-ZIM-DOMAIN PROTEIN 1); protein binding	JAZ1	AT1G19180	FG-SD-sp	FG-SD-gr	5577.85	15027.3	-1.42981	0.0313637
251879_at	late embryogenesis abundant hydroxyproline-rich glycoprotein	AT3G54200	AT3G54200	FG-SD-sp	FG-SD-gr	948.837	2561.95	-1.43301	0.0549577
247293_at	protein TUNICAMYCIN INDUCED 1	AT5G64510	AT5G64510	FG-SD-sp	FG-SD-gr	149.498	404.166	-1.43482	0.00564533
255674_at	PIP1;4 (PLASMA MEMBRANE INTRINSIC PROTEIN 1;4); water channel	PIP1;4	AT4G00430	FG-SD-sp	FG-SD-gr	1506.04	4075.39	-1.43618	0.0505645
264313_at	carbonic anhydrase, putative / carbonate dehydratase, putative	BCA4	AT1G70410	FG-SD-sp	FG-SD-gr	688.838	1865.46	-1.43729	0.0164829
253827_at	hypothetical protein	AT4G28085	AT4G28085	FG-SD-sp	FG-SD-gr	1377.69	3733.19	-1.43815	0.0145524
245613_at	ATBET12; SNAP receptor/ protein transporter	ATBET12	---	FG-SD-sp	FG-SD-gr	250.163	680.671	-1.44409	0.0102489
264262_at	histone H3 /// histone H3 /// histone H3 /// histone H3 /// histone H3.1	AT1G09200 /// AT3G27360 /// AT5G10390 /// AT5G10400 /// AT5G65360	AT1G09200	FG-SD-sp	FG-SD-gr	99.7921	271.6	-1.44448	0.0106463
245041_at	AR781	AR781	AT2G26530	FG-SD-sp	FG-SD-gr	1793.44	4892.99	-1.44799	0.0494782
254434_at	ethylene-responsive/regulated nuclear protein	AT4G20880	AT4G20880	FG-SD-sp	FG-SD-gr	162.565	444.783	-1.45208	0.00269923
255577_at	late embryogenesis abundant hydroxyproline-rich glycoprotein	AT4G01410	AT4G01410	FG-SD-sp	FG-SD-gr	121.27	332.184	-1.45376	0.0119351
262480_at	G-type lectin S-receptor-like serine/threonine-protein kinase	AT1G11340	AT1G11340	FG-SD-sp	FG-SD-gr	26.8359	73.7604	-1.45869	0.0413594
249267_at	BTI3 (VIRB2-INTERACTING PROTEIN 3)	BTI3	AT5G41600	FG-SD-sp	FG-SD-gr	812.922	2235.12	-1.45916	0.00722436
266271_at	ATGSTU6 (ARABIDOPSIS THALIANA GLUTATHIONE S-TRANSFERASE TAU 6); glutathione transferase	ATGSTU6	AT2G29440	FG-SD-sp	FG-SD-gr	50.5087	138.973	-1.4602	0.0433023
263073_at	auxin efflux carrier family protein	AT2G17500	AT2G17500	FG-SD-sp	FG-SD-gr	1930.74	5323.37	-1.46319	0.045391
260472_at	hypothetical protein	AT1G10990	AT1G10990	FG-SD-sp	FG-SD-gr	76.3309	210.727	-1.46504	0.052678
245788_at	hypothetical protein	AT1G32120	AT1G32120	FG-SD-sp	FG-SD-gr	234.295	647.79	-1.4672	0.0328275
247794_at	PLC1 (PHOSPHOLIPASE C 1); phospholipase C	PLC1	AT5G58670	FG-SD-sp	FG-SD-gr	137.313	380.142	-1.46907	0.0511149
251451_s_at	F-box/LRR-repeat protein /// pentatricopeptide repeat-containing protein	AT3G60040 /// AT3G60050	AT3G60040 /// AT3G60050	FG-SD-sp	FG-SD-gr	30.8009	85.3449	-1.47033	0.0523058
261006_at	FAD-binding and BBE domain-containing protein	AT1G26410	AT1G26410	FG-SD-sp	FG-SD-gr	135.897	376.612	-1.47056	0.0407932
258979_at	heat shock protein 70-3	AT3G09440	AT3G09440	FG-SD-sp	FG-SD-gr	1679.92	4656.16	-1.47075	0.0539755
251336_at	BAP1 (BON ASSOCIATION PROTEIN 1); phospholipid binding / protein binding	BAP1	AT3G61190	FG-SD-sp	FG-SD-gr	1767.71	4909.42	-1.47367	0.0176066
252114_at	strictosidine synthase family protein	AT3G51450	AT3G51450	FG-SD-sp	FG-SD-gr	510.923	1422.7	-1.47746	0.00274156
261471_at	AAA-type ATPase family protein	AT1G14460	AT1G14460	FG-SD-sp	FG-SD-gr	28.763	80.1318	-1.47816	0.0115461
265672_at	cysteine proteinase inhibitor 2	CYS2	AT2G31980	FG-SD-sp	FG-SD-gr	227.727	635.114	-1.47971	0.0528264
264348_at	NRT1.1; nitrate transmembrane transporter/ transporter	NRT1.1	AT1G12110	FG-SD-sp	FG-SD-gr	48.8708	136.298	-1.47972	0.0127878
262671_at	CPK29; ATP binding / calcium ion binding / calmodulin-dependent protein kinase/ kinase/ protein kinase	CPK29	AT1G76040	FG-SD-sp	FG-SD-gr	161.559	451.286	-1.48198	0.0124367
257697_at	aspartyl protease family protein	AT3G12700	AT3G12700	FG-SD-sp	FG-SD-gr	139.672	390.195	-1.48215	0.00682298
260391_at	SS2 (STRICTOSIDINE SYNTHASE 2); strictosidine synthase	SS2	AT1G74020	FG-SD-sp	FG-SD-gr	1972.48	5524.27	-1.48577	0.0242604
253898_s_at	TSB2 (TRYPTOPHAN SYNTHASE BETA-SUBUNIT 2); tryptophan synthase	TSB2	AT4G27070 /// AT5G54810	FG-SD-sp	FG-SD-gr	2979.67	8356.04	-1.48767	0.00600448
249330_at	hypothetical protein	AT5G40970	AT5G40970	FG-SD-sp	FG-SD-gr	62.5664	175.715	-1.48978	0.0138565
265674_at	hypothetical protein	AT2G32190	AT2G32190	FG-SD-sp	FG-SD-gr	989.98	2782.38	-1.49085	0.0412772
266962_at	phosphatidylinositol N-acetyglucosaminlytransferase subunit P-like protein	AT2G39435	AT2G39435	FG-SD-sp	FG-SD-gr	121.829	342.584	-1.4916	0.0292531
263182_at	hypothetical protein	AT1G05575	AT1G05575	FG-SD-sp	FG-SD-gr	2027.02	5716.43	-1.49576	0.0213635
247431_at	SRO5 (SIMILAR TO RCD ONE 5); NAD+ ADP-ribosyltransferase	SRO5	AT5G62520	FG-SD-sp	FG-SD-gr	1122.05	3173.51	-1.49994	0.053918
245463_at	ATEXLB1 (ARABIDOPSIS THALIANA EXPANSIN-LIKE B1)	ATEXLB1	AT4G17030	FG-SD-sp	FG-SD-gr	60.5321	171.356	-1.50123	0.0107683
261763_at	PDR12 (PLEIOTROPIC DRUG RESISTANCE 12); ATPase, coupled to transmembrane movement of substances	PDR12	AT1G15520	FG-SD-sp	FG-SD-gr	426.221	1206.6	-1.50127	0.0388317
260387_at	SOT16 (SULFOTRANSFERASE 16); desulfoglucosinolate sulfotransferase/ sulfotransferase	SOT16	AT1G74100	FG-SD-sp	FG-SD-gr	931.883	2639.21	-1.50189	0.0248741
251023_at	transmembrane amino acid transporter family protein	AT5G02170	AT5G02170	FG-SD-sp	FG-SD-gr	39.5466	112.441	-1.50755	0.0349716
262616_at	2-oxoglutarate-dependent dioxygenase-like protein	AT1G06620	AT1G06620	FG-SD-sp	FG-SD-gr	256.495	730.659	-1.51027	0.0172415
265030_at	putative G-type lectin S-receptor-like serine/threonine-protein kinase	AT1G61610	AT1G61610	FG-SD-sp	FG-SD-gr	128.519	366.18	-1.51057	0.0211574
265643_at	proline-rich family protein	AT2G27390	AT2G27390	FG-SD-sp	FG-SD-gr	139.21	397.275	-1.51287	0.0401604
245209_at	hypothetical protein	AT5G12340	AT5G12340	FG-SD-sp	FG-SD-gr	169.702	484.362	-1.51308	0.0359281
251961_at	AtPPa4 (Arabidopsis thaliana pyrophosphorylase 4); inorganic diphosphatase	AtPPa4	AT3G53620	FG-SD-sp	FG-SD-gr	248.054	710.007	-1.51718	0.0173353
260541_at	defensin-like protein 194	AT2G43530	AT2G43530	FG-SD-sp	FG-SD-gr	159.023	455.702	-1.51886	0.0134003
266265_at	tropinone reductase-like protein	AT2G29340	AT2G29340	FG-SD-sp	FG-SD-gr	905.012	2598.21	-1.52151	0.039672
260668_at	hypothetical protein	AT1G19530	AT1G19530	FG-SD-sp	FG-SD-gr	2462.22	7083.22	-1.52444	0.017267
247452_at	CDF1 (CYCLING DOF FACTOR 1); DNA binding / protein binding / transcription factor	CDF1	AT5G62430	FG-SD-sp	FG-SD-gr	371.324	1068.64	-1.52503	0.0164547
252233_at	MYB84 (MYB DOMAIN PROTEIN 84); DNA binding / transcription factor	MYB84	AT3G49690	FG-SD-sp	FG-SD-gr	20.9721	60.4174	-1.52649	0.0167699
262603_at	Lactoylglutathione lyase / glyoxalase I family protein	AT1G15380	AT1G15380	FG-SD-sp	FG-SD-gr	4008.02	11556.9	-1.52779	0.00429719
253485_at	WRKY18; transcription factor	WRKY18	AT4G31800	FG-SD-sp	FG-SD-gr	1113.4	3211.54	-1.5283	0.0060577
261501_at	serine/threonine-protein kinase-like protein	AT1G28390	AT1G28390	FG-SD-sp	FG-SD-gr	44.7869	129.229	-1.52878	0.00653753
266014_s_at	hypothetical protein /// hypothetical protein /// hypothetical protein	ArthMp016 /// ArthMp055 /// AT2G07722	AT2G07722 /// ATMG00170 /// ATMG00620	FG-SD-sp	FG-SD-gr	47.0551	136.356	-1.53496	0.0310702
244901_at	unknown protein	ORF25	ATMG00640	FG-SD-sp	FG-SD-gr	186.601	541.62	-1.53732	0.0476164
255558_at	GLB1 (GLNB1 HOMOLOG); acetylglutamate kinase regulator	GLB1	AT4G01900	FG-SD-sp	FG-SD-gr	129.83	377.066	-1.53819	0.0286483
259105_at	Rubber elongation factor protein	AT3G05500	AT3G05500	FG-SD-sp	FG-SD-gr	1689.26	4909.18	-1.53909	0.0485646
247492_at	ethylene-responsive transcription factor ERF114	AT5G61890	AT5G61890	FG-SD-sp	FG-SD-gr	58.9092	171.315	-1.54009	0.0424628
264636_at	hypothetical protein	AT1G65490	AT1G65490	FG-SD-sp	FG-SD-gr	753.672	2192.85	-1.5408	0.0356589
252563_at	ATEXLA1 (ARABIDOPSIS THALIANA EXPANSIN-LIKE A1)	ATEXLA1	AT3G45970	FG-SD-sp	FG-SD-gr	1029.19	2997.84	-1.54241	0.0234346
264725_at	hypothetical protein	AT1G22885	AT1G22885	FG-SD-sp	FG-SD-gr	718.926	2098.3	-1.5453	0.0170779
260033_at	ATNUDX1 (ARABIDOPSIS THALIANA NUDIX HYDROLASE 1); dihydroneopterin triphosphate pyrophosphohydrolase/ hydrolase	ATNUDX1	AT1G68760	FG-SD-sp	FG-SD-gr	124.86	365.51	-1.5496	0.019782
258002_at	AIG2 (AVRRPT2-INDUCED GENE 2)	AIG2	AT3G28930	FG-SD-sp	FG-SD-gr	585.617	1719.73	-1.55415	0.0429061
265221_s_at	GAD3 (glutamate decarboxylase 3); calmodulin binding	GAD3	AT2G02000 /// AT2G02010	FG-SD-sp	FG-SD-gr	49.2737	145.294	-1.56009	0.0153413
260011_at	putative clathrin assembly protein	AT1G68110	AT1G68110	FG-SD-sp	FG-SD-gr	31.4133	92.6313	-1.56012	0.0146719
256933_at	protease inhibitor/seed storage/lipid transfer protein (LTP) family protein	AT3G22600	AT3G22600	FG-SD-sp	FG-SD-gr	1305.07	3851.39	-1.56125	0.022208
261021_at	FAD-binding and BBE domain-containing protein	AT1G26380	AT1G26380	FG-SD-sp	FG-SD-gr	859.471	2538.28	-1.56233	0.00538694
245362_at	HAT1; DNA binding / transcription factor	HAT1	AT4G17460	FG-SD-sp	FG-SD-gr	75.932	224.569	-1.56438	0.0549465
265479_at	hypothetical protein	AT2G15760	AT2G15760	FG-SD-sp	FG-SD-gr	64.4917	190.984	-1.56627	0.015314
257088_at	transmembrane protein 14C	AT3G20510	AT3G20510	FG-SD-sp	FG-SD-gr	1692.9	5015.57	-1.56691	0.0113156
251544_at	GAUT15 (Galacturonosyltransferase 15); polygalacturonate 4-alpha-galacturonosyltransferase/ transferase, transferring glycosyl groups / transferase, transferring hexosyl groups	GAUT15	AT3G58790	FG-SD-sp	FG-SD-gr	127.119	376.774	-1.56752	0.0169382
267470_at	C4H (CINNAMATE-4-HYDROXYLASE); trans-cinnamate 4-monooxygenase	C4H	AT2G30490	FG-SD-sp	FG-SD-gr	1801.05	5358.52	-1.573	0.0150439
255884_at	hypothetical protein	AT1G20310	AT1G20310	FG-SD-sp	FG-SD-gr	157.292	468.761	-1.57541	0.0297602
246888_at	hypothetical protein	AT5G26270	AT5G26270	FG-SD-sp	FG-SD-gr	87.7796	262.63	-1.58107	0.0264157
247884_at	CER3 (ECERIFERUM 3); binding / catalytic/ iron ion binding / oxidoreductase	CER3	AT5G57800	FG-SD-sp	FG-SD-gr	203.989	611.091	-1.58289	0.005066
258830_at	PPPDE putative thiol peptidase family protein	AT3G07090	AT3G07090	FG-SD-sp	FG-SD-gr	665.999	1997	-1.58424	0.0478907
248914_at	AtRABA1c (Arabidopsis Rab GTPase homolog A1c); GTP binding	AtRABA1c	AT5G45750	FG-SD-sp	FG-SD-gr	999.586	3008.9	-1.58983	0.0261746
259181_at	alpha/beta-hydrolase domain-containing protein	AT3G01690	AT3G01690	FG-SD-sp	FG-SD-gr	340.934	1026.39	-1.59001	0.0244484
258415_at	MTO3 (METHIONINE OVER-ACCUMULATOR 3); methionine adenosyltransferase	MTO3	AT3G17390	FG-SD-sp	FG-SD-gr	1392.78	4199.95	-1.5924	0.0289477
262694_at	Bifunctional inhibitor/lipid-transfer protein/seed storage 2S albumin superfamily protein	AT1G62790	AT1G62790	FG-SD-sp	FG-SD-gr	350.138	1058.61	-1.59617	0.00769145
254740_s_at	SHM4 (serine hydroxymethyltransferase 4); catalytic/ glycine hydroxymethyltransferase/ pyridoxal phosphate binding	SHM4	AT4G13890 /// AT4G13930	FG-SD-sp	FG-SD-gr	186.446	565.186	-1.59997	0.0226697
253697_at	alkaline-phosphatase-like protein	AT4G29700	AT4G29700	FG-SD-sp	FG-SD-gr	83.1996	252.41	-1.60112	0.0464882
258357_at	SRF7 (STRUBBELIG-RECEPTOR FAMILY 7); ATP binding / protein binding / protein kinase/ protein serine/threonine kinase/ protein tyrosine kinase	SRF7	AT3G14350	FG-SD-sp	FG-SD-gr	218.089	667.373	-1.61358	0.0489742
263366_at	RabGAP/TBC domain-containing protein	AT2G20440	AT2G20440	FG-SD-sp	FG-SD-gr	50.294	153.991	-1.61439	0.046488
259605_at	PUB45 (PLANT U-BOX 45); ubiquitin-protein ligase	PUB45	AT1G27910	FG-SD-sp	FG-SD-gr	83.2835	255.452	-1.61695	0.0539955
256880_at	SRPBCC ligand-binding domain-containing protein	AT3G26450	AT3G26450	FG-SD-sp	FG-SD-gr	236.146	726.468	-1.62122	0.0146441
265229_s_at	hypothetical protein /// hypothetical protein /// NADH dehydrogenase subunit 1	ArthMp036 /// AT2G07701 /// nad1	AT2G07666 /// AT2G07701 /// ATMG00430 /// ATMG01150	FG-SD-sp	FG-SD-gr	25.1885	77.5435	-1.62224	0.0357012
257925_at	hypothetical protein	AT3G23170	AT3G23170	FG-SD-sp	FG-SD-gr	671.768	2076.08	-1.62783	0.0323608
252045_at	PUB22 (PLANT U-BOX 22); ubiquitin-protein ligase	PUB22	AT3G52450	FG-SD-sp	FG-SD-gr	212.562	659.381	-1.63323	0.0390173
266545_at	hypothetical protein	AT2G35290	AT2G35290	FG-SD-sp	FG-SD-gr	1107.19	3437.14	-1.63431	0.00546261
264774_at	hypothetical protein	AT1G22890	AT1G22890	FG-SD-sp	FG-SD-gr	2281.29	7101.91	-1.63836	0.00758383
246955_at	CPK1 (CALCIUM DEPENDENT PROTEIN KINASE 1); calmodulin-dependent protein kinase/ kinase	CPK1	AT5G04870	FG-SD-sp	FG-SD-gr	310.141	969.338	-1.64408	0.0376781
258616_at	leucine-rich repeat protein kinase family protein	AT3G02880	AT3G02880	FG-SD-sp	FG-SD-gr	1218.61	3809.31	-1.6443	0.012375
257840_at	AGC2-1 (OXIDATIVE SIGNAL-INDUCIBLE1); kinase	AGC2-1	AT3G25250	FG-SD-sp	FG-SD-gr	123.446	385.996	-1.6447	0.0431301
266461_at	ATGSTF8 (ARABIDOPSIS THALIANA GLUTATHIONE S-TRANSFERASE PHI 8); glutathione binding / glutathione transferase	ATGSTF8	AT2G47730	FG-SD-sp	FG-SD-gr	3246.57	10164.6	-1.64656	0.00812841
261261_at	phosphate transporter PHO1-7	AT1G26730	AT1G26730	FG-SD-sp	FG-SD-gr	95.1709	298.114	-1.64727	0.0458535
260405_at	ATGSTU11 (GLUTATHIONE S-TRANSFERASE TAU 11); glutathione transferase	ATGSTU11	AT1G69930	FG-SD-sp	FG-SD-gr	225.775	710.286	-1.65351	0.00190242
250289_at	GSH-induced LITAF domain protein	AT5G13190	AT5G13190	FG-SD-sp	FG-SD-gr	3236.23	10213.1	-1.65803	0.0388041
261081_at	serine/arginine rich-like protein SR45a	AT1G07350	AT1G07350	FG-SD-sp	FG-SD-gr	439.795	1388.85	-1.65898	0.0175115
250496_at	AtPPa6 (Arabidopsis thaliana pyrophosphorylase 6); inorganic diphosphatase/ pyrophosphatase	AtPPa6	AT5G09650	FG-SD-sp	FG-SD-gr	531.358	1679.34	-1.66014	0.0366457
267209_at	hypothetical protein	AT2G30930	AT2G30930	FG-SD-sp	FG-SD-gr	1408.82	4459.24	-1.66231	0.00431125
251964_at	DNA-binding protein S1FA1	AT3G53370	AT3G53370	FG-SD-sp	FG-SD-gr	62.8207	199.083	-1.66406	0.0165441
262733_s_at	ARAB-1; carboxylesterase/ hydrolase, acting on ester bonds	ARAB-1	AT1G28660 /// AT1G28670	FG-SD-sp	FG-SD-gr	281.913	893.602	-1.66438	0.0498473
262935_at	AtOCT5 (Arabidopsis thaliana ORGANIC CATION/CARNITINE TRANSPORTER5); carbohydrate transmembrane transporter/ sugar:hydrogen symporter	AtOCT5	AT1G79410	FG-SD-sp	FG-SD-gr	202.451	641.824	-1.6646	0.0276318
267604_at	ZFN2 (ZINC FINGER NUCLEASE 2); DNA binding / nuclease/ nucleic acid binding	ZFN2	AT2G32930	FG-SD-sp	FG-SD-gr	179.871	573.164	-1.67198	0.0248722
267567_at	CYP71A13 (cytochrome P450, family 71, subfamily A, polypeptide 13); indoleacetaldoxime dehydratase/ oxygen binding	CYP71A13	AT2G30770	FG-SD-sp	FG-SD-gr	83.3004	265.52	-1.67243	0.0331872
248133_at	hypothetical protein	AT5G54850	AT5G54850	FG-SD-sp	FG-SD-gr	73.7795	235.306	-1.67325	0.0200243
250267_at	hypothetical protein	AT5G12930	AT5G12930	FG-SD-sp	FG-SD-gr	160.384	512.381	-1.67569	0.0330945
263754_at	DNAJ heat shock N-terminal domain-containing protein	AT2G21510	AT2G21510	FG-SD-sp	FG-SD-gr	158.622	508.944	-1.68192	0.0111226
251114_at	trihelix transcription factor GT-3a	AT5G01380	AT5G01380	FG-SD-sp	FG-SD-gr	34.6773	111.466	-1.68454	0.0176548
248619_at	AAP6 (AMINO ACID PERMEASE 6); acidic amino acid transmembrane transporter/ amino acid transmembrane transporter/ neutral amino acid transmembrane transporter	AAP6	AT5G49630	FG-SD-sp	FG-SD-gr	215.372	696.384	-1.69305	0.0224076
259611_at	AtRABG3d (Arabidopsis Rab GTPase homolog G3d); GTP binding	AtRABG3d	AT1G52280	FG-SD-sp	FG-SD-gr	171.077	553.398	-1.69368	0.0447967
251846_at	HTA11; DNA binding	HTA11	AT3G54560	FG-SD-sp	FG-SD-gr	36.7038	118.765	-1.69411	0.00656678
248611_at	WRKY48; transcription factor	WRKY48	AT5G49520	FG-SD-sp	FG-SD-gr	702.831	2281.23	-1.69856	0.0384271
261412_at	APX1 (ascorbate peroxidase 1); L-ascorbate peroxidase	APX1	AT1G07890	FG-SD-sp	FG-SD-gr	5085.99	16519.1	-1.69953	0.0344904
253203_at	ADC2 (ARGININE DECARBOXYLASE 2); arginine decarboxylase	ADC2	AT4G34710	FG-SD-sp	FG-SD-gr	2496.37	8122.6	-1.70211	0.0314286
256177_at	protein kinase superfamily protein	AT1G51620	AT1G51620	FG-SD-sp	FG-SD-gr	42.2704	137.542	-1.70215	0.036541
246756_at	putative protein phosphatase 2C 73	AT5G27930	AT5G27930	FG-SD-sp	FG-SD-gr	494.223	1612.57	-1.70613	0.038644
264857_at	LGT9; polygalacturonate 4-alpha-galacturonosyltransferase/ transferase, transferring glycosyl groups / transferase, transferring hexosyl groups	LGT9	AT1G24170	FG-SD-sp	FG-SD-gr	131.199	428.685	-1.70816	0.0137031
252058_at	late embryogenesis abundant hydroxyproline-rich glycoprotein	AT3G52470	AT3G52470	FG-SD-sp	FG-SD-gr	372.804	1222.81	-1.71371	0.017524
255881_at	DIN9 (DARK INDUCIBLE 9); mannose-6-phosphate isomerase	DIN9	AT1G67070	FG-SD-sp	FG-SD-gr	243.351	799.206	-1.71553	0.0436743
265230_s_at	ATPase, F0 complex, subunit 8 /// orfB	AT2G07707 /// orfB	AT2G07707 /// ATMG00480	FG-SD-sp	FG-SD-gr	186.79	613.695	-1.7161	0.00837906
261934_at	UGT85A1; UDP-glycosyltransferase/ cis-zeatin O-beta-D-glucosyltransferase/ glucuronosyltransferase/ trans-zeatin O-beta-D-glucosyltransferase/ transferase, transferring glycosyl groups / transferase, transferring hexosyl groups	UGT85A1	AT1G22400	FG-SD-sp	FG-SD-gr	815.099	2678.82	-1.71655	0.04794
247864_s_at	ASB1 (ANTHRANILATE SYNTHASE BETA SUBUNIT 1); anthranilate synthase	ASB1	AT1G24807 /// AT1G24909 /// AT1G25083 /// AT1G25155 /// AT1G25220 /// AT5G57890	FG-SD-sp	FG-SD-gr	1327.59	4386.03	-1.72411	0.0208308
250738_at	ASA1 (ANTHRANILATE SYNTHASE ALPHA SUBUNIT 1); anthranilate synthase	ASA1	AT5G05730	FG-SD-sp	FG-SD-gr	1746.59	5784.05	-1.72754	0.0366338
246584_at	hypothetical protein	AT5G14730	AT5G14730	FG-SD-sp	FG-SD-gr	205.832	681.865	-1.72802	0.0525703
247848_at	TIR-NBS-LRR class disease resistance protein	AT5G58120	AT5G58120	FG-SD-sp	FG-SD-gr	715.563	2373.46	-1.72984	0.0350244
266808_at	hypothetical protein	AT2G29995	AT2G29995	FG-SD-sp	FG-SD-gr	179.898	596.869	-1.73023	0.0447352
264960_at	ATEXT4 (EXTENSIN 4); structural constituent of cell wall	ATEXT4	AT1G76930	FG-SD-sp	FG-SD-gr	720.074	2390.16	-1.73089	0.0136811
245305_at	pollen Ole e 1 allergen and extensin family protein	AT4G17215	AT4G17215	FG-SD-sp	FG-SD-gr	46.4375	154.198	-1.73142	0.00494448
265118_at	acid beta-fructofuranosidase 3	AT1G62660	AT1G62660	FG-SD-sp	FG-SD-gr	731.495	2431.53	-1.73294	0.0398418
247913_at	hypothetical protein	AT5G57510	AT5G57510	FG-SD-sp	FG-SD-gr	428.225	1423.5	-1.733	0.0241497
260222_at	XXT5 (XYLOGLUCAN XYLOSYLTRANSFERASE 5); transferase/ transferase, transferring glycosyl groups / xyloglucan 6-xylosyltransferase	XXT5	AT1G74380	FG-SD-sp	FG-SD-gr	280.525	933.36	-1.73431	0.00398157
254575_at	UDP-glycosyltransferase family protein	AT4G19460	AT4G19460	FG-SD-sp	FG-SD-gr	166.639	555.645	-1.73744	0.0377507
254524_at	VQ motif-containing protein	AT4G20000	AT4G20000	FG-SD-sp	FG-SD-gr	210.846	704.151	-1.7397	0.0283071
264717_at	ATFH8 (formin 8); actin binding / actin filament binding / profilin binding	ATFH8	AT1G70140	FG-SD-sp	FG-SD-gr	171.256	573.444	-1.7435	0.00522021
264424_at	Sulfite exporter TauE/SafE family protein	AT1G61740	AT1G61740	FG-SD-sp	FG-SD-gr	1482.5	4976.02	-1.74696	0.0507293
266319_s_at	KCS13 (3-KETOACYL-COA SYNTHASE 13); acyltransferase/ catalytic/ transferase, transferring acyl groups other than amino-acyl groups	KCS13	AT2G46720 /// AT3G10280	FG-SD-sp	FG-SD-gr	66.3524	223.312	-1.75084	0.0360038
266168_at	PR-6 proteinase inhibitor family protein	AT2G38870	AT2G38870	FG-SD-sp	FG-SD-gr	1981.63	6735.55	-1.76511	0.0411932
248205_at	hypothetical protein	AT5G54300	AT5G54300	FG-SD-sp	FG-SD-gr	290.503	987.718	-1.76555	0.0100123
266536_at	phospholipase-like protein (PEARLI 4) family	AT2G16900	AT2G16900	FG-SD-sp	FG-SD-gr	313.617	1066.66	-1.76603	0.00466729
257194_at	ATSERAT2;2 (SERINE ACETYLTRANSFERASE 2;2); serine O-acetyltransferase	ATSERAT2;2	AT3G13110	FG-SD-sp	FG-SD-gr	596.862	2031.47	-1.76706	0.0427635
248448_at	ethylene-responsive transcription factor ERF105	AT5G51190	AT5G51190	FG-SD-sp	FG-SD-gr	226.378	773.416	-1.77251	0.012233
247885_at	hypothetical protein	AT5G57830	AT5G57830	FG-SD-sp	FG-SD-gr	24.5072	84.1723	-1.78014	0.0369086
251769_at	CCR3 (ARABIDOPSIS THALIANA CRINKLY4 RELATED 3); kinase	CCR3	AT3G55950	FG-SD-sp	FG-SD-gr	227.556	782.125	-1.78118	0.0488401
248904_at	hypothetical protein	AT5G46295	AT5G46295	FG-SD-sp	FG-SD-gr	48.9899	168.584	-1.78291	0.000849237
247922_at	Galactosyltransferase family protein	AT5G57500	AT5G57500	FG-SD-sp	FG-SD-gr	130.568	449.775	-1.7844	0.016307
252437_at	plant invertase/pectin methylesterase inhibitor superfamily protein	AT3G47380	AT3G47380	FG-SD-sp	FG-SD-gr	132.205	460.889	-1.80165	0.0033993
258037_at	4CL5 (4-coumarate:CoA ligase 5); 4-coumarate-CoA ligase	4CL5	AT3G21230	FG-SD-sp	FG-SD-gr	151.414	528.799	-1.80422	0.0286223
247109_at	ATPSK5 (PHYTOSULFOKINE 5 PRECURSOR); growth factor	ATPSK5	AT5G65870	FG-SD-sp	FG-SD-gr	105.31	367.852	-1.80448	0.0445683
251984_at	PAL2; phenylalanine ammonia-lyase	PAL2	AT3G53260	FG-SD-sp	FG-SD-gr	1615.97	5684.26	-1.81457	0.0520539
245346_at	CT-BMY (CHLOROPLAST BETA-AMYLASE); beta-amylase	CT-BMY	AT4G17090	FG-SD-sp	FG-SD-gr	818.168	2882.23	-1.81672	0.0391825
264638_at	FT (FLOWERING LOCUS T); phosphatidylethanolamine binding / protein binding	FT	AT1G65480	FG-SD-sp	FG-SD-gr	139.806	495.36	-1.82505	0.046622
252943_at	CAD9 (CINNAMYL ALCOHOL DEHYDROGENASE 9); binding / catalytic/ oxidoreductase/ zinc ion binding	CAD9	AT4G39330	FG-SD-sp	FG-SD-gr	87.5519	312.149	-1.83402	0.0045704
258364_at	GLIP4; carboxylesterase/ lipase	GLIP4	AT3G14225	FG-SD-sp	FG-SD-gr	35.2469	125.915	-1.83688	0.0500678
258277_at	PAD3 (PHYTOALEXIN DEFICIENT 3); dihydrocamalexic acid decarboxylase/ monooxygenase/ oxygen binding	PAD3	AT3G26830	FG-SD-sp	FG-SD-gr	979.51	3503.88	-1.83882	0.0210484
249469_at	putative UDP-glucose 6-dehydrogenase 2	AT5G39320	AT5G39320	FG-SD-sp	FG-SD-gr	32.1076	115.084	-1.84171	0.0315105
246340_s_at	FAMT (farnesoic acid carboxyl-O-methyltransferase); S-adenosylmethionine-dependent methyltransferase/ farnesoic acid O-methyltransferase	FAMT	AT3G44860 /// AT3G44870	FG-SD-sp	FG-SD-gr	1368.75	4910.43	-1.84299	0.0483794
255284_at	APR1 (APS REDUCTASE 1); adenylyl-sulfate reductase	42826	AT4G04610	FG-SD-sp	FG-SD-gr	80.6961	289.702	-1.844	0.0452386
261500_at	hypothetical protein	AT1G28400	AT1G28400	FG-SD-sp	FG-SD-gr	38.4493	138.262	-1.84638	0.0355727
247597_at	AtRABA1f (Arabidopsis Rab GTPase homolog A1f); GTP binding	AtRABA1f	AT5G60860	FG-SD-sp	FG-SD-gr	280.138	1009.96	-1.85008	0.00986435
265444_s_at	RD28 (RESPONSIVE TO DESICCATION 28); water channel	RD28	AT2G37170 /// AT2G37180	FG-SD-sp	FG-SD-gr	926.691	3353.18	-1.85537	0.0439694
267565_at	CYP71A12 (cytochrome P450, family 71, subfamily A, polypeptide 12); electron carrier/ heme binding / iron ion binding / monooxygenase/ oxygen binding	CYP71A12	AT2G30750	FG-SD-sp	FG-SD-gr	189.033	684.008	-1.85537	0.0165652
253796_at	hypothetical protein	AT4G28460	AT4G28460	FG-SD-sp	FG-SD-gr	343.525	1246.49	-1.85938	0.0324361
245776_at	hypothetical protein	AT1G30260	AT1G30260	FG-SD-sp	FG-SD-gr	560.555	2035.18	-1.86023	0.0404653
254889_at	ATOSM34 (osmotin 34)	ATOSM34	AT4G11650	FG-SD-sp	FG-SD-gr	5858.37	21350.9	-1.86573	0.0476663
264211_at	GI (GIGANTEA)	GI	AT1G22770	FG-SD-sp	FG-SD-gr	337.961	1232.36	-1.8665	0.00215422
266800_at	VQ motif-containing protein	AT2G22880	AT2G22880	FG-SD-sp	FG-SD-gr	1164.08	4290.13	-1.88184	0.0450214
254327_at	bifunctional inhibitor/lipid-transfer protein/seed storage 2S albumin superfamily protein	AT4G22490	AT4G22490	FG-SD-sp	FG-SD-gr	21.1964	78.2542	-1.88435	0.00456059
252280_at	iqd21 (IQ-domain 21); calmodulin binding	iqd21	AT3G49260	FG-SD-sp	FG-SD-gr	30.3016	112.099	-1.88731	0.00187227
251144_at	HXXXD-type acyl-transferase-like protein	AT5G01210	AT5G01210	FG-SD-sp	FG-SD-gr	360.109	1334.64	-1.88994	0.0343084
254770_at	leucine-rich repeat extensin-like protein 3	AT4G13340	AT4G13340	FG-SD-sp	FG-SD-gr	110.397	410.77	-1.89562	0.0239063
266799_at	ATPSK2 (PHYTOSULFOKINE 2 PRECURSOR); growth factor	ATPSK2	AT2G22860	FG-SD-sp	FG-SD-gr	1432.09	5352.39	-1.90206	0.038978
251847_at	TSA1 (TRYPTOPHAN SYNTHASE ALPHA CHAIN); tryptophan synthase	TSA1	AT3G54640	FG-SD-sp	FG-SD-gr	1196.57	4477.29	-1.90373	0.00574389
253636_at	hypothetical protein	AT4G30500	AT4G30500	FG-SD-sp	FG-SD-gr	78.8449	297.498	-1.91579	0.0340173
249123_at	KCS20 (3-KETOACYL-COA SYNTHASE 20); fatty acid elongase	KCS20	AT5G43760	FG-SD-sp	FG-SD-gr	546.509	2063.22	-1.91658	0.0117515
248199_at	lipid-binding START domain-containing protein	AT5G54170	AT5G54170	FG-SD-sp	FG-SD-gr	1251.08	4756.85	-1.92683	0.037627
266832_at	MAPKKK14; ATP binding / kinase/ protein kinase/ protein serine/threonine kinase	MAPKKK14	AT2G30040	FG-SD-sp	FG-SD-gr	805.751	3065.9	-1.92791	0.0291136
256168_at	leucine-rich repeat protein kinase family protein	AT1G51805	AT1G51805	FG-SD-sp	FG-SD-gr	185.672	707.498	-1.92997	0.014969
267040_at	putative methyltransferase PMT25	AT2G34300	AT2G34300	FG-SD-sp	FG-SD-gr	62.782	240.157	-1.93555	0.0324515
254630_at	glycolate oxidase	AT4G18360	AT4G18360	FG-SD-sp	FG-SD-gr	186.267	721.378	-1.95339	0.0319255
254561_at	hypothetical protein	AT4G19160	AT4G19160	FG-SD-sp	FG-SD-gr	1827.02	7095.83	-1.95748	0.0292547
261037_at	LOX3; electron carrier/ iron ion binding / lipoxygenase/ metal ion binding / oxidoreductase, acting on single donors with incorporation of molecular oxygen, incorporation of two atoms of oxygen	LOX3	AT1G17420	FG-SD-sp	FG-SD-gr	626.824	2438.2	-1.95968	0.0233914
251861_at	zinc finger (GATA type) family protein	BME3	AT3G54810	FG-SD-sp	FG-SD-gr	1009.64	3973.38	-1.97652	0.00343824
250014_at	TRP1 (tryptophan biosynthesis 1); anthranilate phosphoribosyltransferase	TRP1	AT5G17990	FG-SD-sp	FG-SD-gr	866.991	3413	-1.97695	0.0484424
256186_at	4CL1 (4-COUMARATE:COA LIGASE 1); 4-coumarate-CoA ligase	4CL1	AT1G51680	FG-SD-sp	FG-SD-gr	1279.23	5044.32	-1.97939	0.00433143
255261_s_at	FUR1 (FUDR RESISTANT 1); nucleoside transmembrane transporter	FUR1	AT4G05110 /// AT4G05120	FG-SD-sp	FG-SD-gr	34.1936	135.132	-1.98257	0.0448978
262887_at	MAC/Perforin domain-containing protein	AT1G14780	AT1G14780	FG-SD-sp	FG-SD-gr	132.912	526.838	-1.98689	0.0513553
260023_at	ATGA2OX2 (GIBBERELLIN 2-OXIDASE); gibberellin 2-beta-dioxygenase	ATGA2OX2	AT1G30040	FG-SD-sp	FG-SD-gr	122.918	490.337	-1.99607	0.0375369
256964_at	AGP12 (ARABINOGALACTAN PROTEIN 12)	AGP12	AT3G13520	FG-SD-sp	FG-SD-gr	174.439	695.88	-1.99612	0.0448352
266296_at	ATGSTU7 (ARABIDOPSIS THALIANA GLUTATHIONE S-TRANSFERASE TAU 7); glutathione transferase	ATGSTU7	AT2G29420	FG-SD-sp	FG-SD-gr	949.412	3790.79	-1.99739	0.0289438
249009_at	MAP18 (Microtubule-associated Protein 18); microtubule binding	MAP18	AT5G44610	FG-SD-sp	FG-SD-gr	77.995	311.588	-1.99818	0.00898225
245127_at	ATMHX (ARABIDOPSIS THALIANA MAGNESIUM/PROTON EXCHANGER); calcium:sodium antiporter/ cation:cation antiporter	ATMHX	AT2G47600	FG-SD-sp	FG-SD-gr	1257.63	5036.78	-2.0018	0.0124952
247524_at	ACHT5 (ATYPICAL CYS HIS RICH THIOREDOXIN 5)	ACHT5	AT5G61440	FG-SD-sp	FG-SD-gr	113.629	458.531	-2.01269	0.00548344
266022_at	Subtilase-like protein	AT2G05920	AT2G05920	FG-SD-sp	FG-SD-gr	161.283	656.516	-2.02524	0.026836
252049_at	F-box associated ubiquitination effector family protein	AT3G52510	AT3G52510	FG-SD-sp	FG-SD-gr	18.4475	75.1852	-2.02702	0.0365413
245929_at	alcohol dehydrogenase-like 6	AT5G24760	AT5G24760	FG-SD-sp	FG-SD-gr	139.983	571.624	-2.02981	0.0223529
258056_at	biotin/lipoate A/B protein ligase family protein	AT3G29010	AT3G29010	FG-SD-sp	FG-SD-gr	40.6554	167.384	-2.04165	0.0496489
247933_at	hypothetical protein	AT5G56980	AT5G56980	FG-SD-sp	FG-SD-gr	554.28	2282.64	-2.04202	0.00640149
262085_at	hypothetical protein	AT1G56060	AT1G56060	FG-SD-sp	FG-SD-gr	161.821	667.228	-2.04378	0.0425446
262360_at	PEPR1 (PEP1 receptor 1); ATP binding / kinase/ protein binding / protein serine/threonine kinase	PEPR1	AT1G73080	FG-SD-sp	FG-SD-gr	428.978	1777.64	-2.05099	0.0131046
248686_at	receptor-like protein kinase-related family protein	AT5G48540	AT5G48540	FG-SD-sp	FG-SD-gr	584.846	2429.31	-2.05442	0.00999796
256865_at	GAE6 (UDP-D-GLUCURONATE 4-EPIMERASE 6); UDP-glucuronate 4-epimerase/ catalytic	GAE6	AT3G23820	FG-SD-sp	FG-SD-gr	413.644	1721.01	-2.05679	0.0420829
265841_at	putative glucuronosyltransferase PGSIP8	AT2G35710	AT2G35710	FG-SD-sp	FG-SD-gr	261.264	1087.5	-2.05744	0.00564316
254200_at	hypothetical protein	AT4G24110	AT4G24110	FG-SD-sp	FG-SD-gr	58.294	243.124	-2.06027	0.0345624
245244_at	ILL6; IAA-amino acid conjugate hydrolase/ metallopeptidase	ILL6	AT1G44350	FG-SD-sp	FG-SD-gr	700.987	2935.95	-2.06637	0.000654244
249101_at	unusual seine protease inhibitor	AT5G43580	AT5G43580	FG-SD-sp	FG-SD-gr	839.849	3524.69	-2.0693	0.0360871
249406_at	nodulin MtN21 /EamA-like transporter family protein	AT5G40210	AT5G40210	FG-SD-sp	FG-SD-gr	23.5808	99.1179	-2.07153	0.0286398
249557_at	PR5K; kinase/ transmembrane receptor protein serine/threonine kinase	PR5K	AT5G38280	FG-SD-sp	FG-SD-gr	30.7559	129.46	-2.07357	0.00761876
262171_at	TIFY10B	TIFY10B	AT1G74950	FG-SD-sp	FG-SD-gr	1650.45	6948.51	-2.07385	0.0181003
263032_at	hypothetical protein	AT1G23850	AT1G23850	FG-SD-sp	FG-SD-gr	139.613	588.635	-2.07594	0.00242073
265475_at	NIR1 (NITRITE REDUCTASE 1); ferredoxin-nitrate reductase/ nitrite reductase (NO-forming)	NIR1	AT2G15620	FG-SD-sp	FG-SD-gr	168.555	714.72	-2.08416	0.00271877
252415_at	ASN1 (GLUTAMINE-DEPENDENT ASPARAGINE SYNTHASE 1); asparagine synthase (glutamine-hydrolyzing)	ASN1	AT3G47340	FG-SD-sp	FG-SD-gr	3009.62	12762.5	-2.08425	0.0344599
257636_at	CYP71B22; electron carrier/ heme binding / iron ion binding / monooxygenase/ oxygen binding	CYP71B22	AT3G26200	FG-SD-sp	FG-SD-gr	390.231	1655.11	-2.08453	0.00112056
261420_at	KCS3 (3-KETOACYL-COA SYNTHASE 3); acyltransferase/ catalytic/ transferase, transferring acyl groups other than amino-acyl groups	KCS3	AT1G07720	FG-SD-sp	FG-SD-gr	206.016	874.458	-2.08563	0.0386656
253274_at	EDA9 (embryo sac development arrest 9); ATP binding	EDA9	AT4G34200	FG-SD-sp	FG-SD-gr	693.408	2953.44	-2.09062	0.0116235
254656_at	hypothetical protein	AT4G18070	AT4G18070	FG-SD-sp	FG-SD-gr	388.986	1677.89	-2.10886	0.0379484
264389_at	putative ERD4 protein	AT1G11960	AT1G11960	FG-SD-sp	FG-SD-gr	259.487	1120.62	-2.11056	0.0207937
258336_at	A37; protein heterodimerization	PDX1.2	AT3G16050	FG-SD-sp	FG-SD-gr	76.2242	330.26	-2.11528	0.0367392
260490_at	CER5 (ECERIFERUM 5); ATPase, coupled to transmembrane movement of substances	CER5	AT1G51500	FG-SD-sp	FG-SD-gr	440.908	1910.43	-2.11534	0.0407134
245755_at	hypothetical protein	AT1G35210	AT1G35210	FG-SD-sp	FG-SD-gr	197.608	858.487	-2.11915	0.0165788
266299_at	ATGSTU5 (ARABIDOPSIS THALIANA GLUTATHIONE S-TRANSFERASE TAU 5); glutathione binding / glutathione transferase	ATGSTU5	AT2G29450	FG-SD-sp	FG-SD-gr	1306.85	5683.06	-2.12058	0.0189041
245250_at	ATERF6 (ETHYLENE RESPONSIVE ELEMENT BINDING FACTOR 6); DNA binding / transcription factor	ATERF6	AT4G17490	FG-SD-sp	FG-SD-gr	104.129	453.879	-2.12394	0.00301748
264289_at	MATE efflux family protein	AT1G61890	AT1G61890	FG-SD-sp	FG-SD-gr	1692.61	7413.24	-2.13086	0.0520282
266324_at	Rho GTPase activating protein with PAK-box/P21-Rho-binding domain	AT2G46710	AT2G46710	FG-SD-sp	FG-SD-gr	37.7021	165.656	-2.13547	0.0358581
252193_at	MYB77; DNA binding / transcription factor	MYB77	AT3G50060	FG-SD-sp	FG-SD-gr	189.404	842.571	-2.15333	0.0255037
256436_at	2-oxoglutarate (2OG) and Fe(II)-dependent oxygenase superfamily protein	AT3G11150	AT3G11150	FG-SD-sp	FG-SD-gr	109.529	488.124	-2.15593	0.0168533
263845_at	pal1 (Phe ammonia lyase 1); phenylalanine ammonia-lyase	pal1	AT2G37040	FG-SD-sp	FG-SD-gr	696.262	3104.18	-2.15651	0.0257436
248154_at	S-adenosyl-L-methionine-dependent methyltransferase-like protein	AT5G54400	AT5G54400	FG-SD-sp	FG-SD-gr	63.2507	284.554	-2.16955	0.0341813
248392_at	MATE efflux family protein	AT5G52050	AT5G52050	FG-SD-sp	FG-SD-gr	821.323	3697.6	-2.17057	0.00237042
252989_at	sks9 (SKU5 Similar 9); copper ion binding / oxidoreductase	sks9	AT4G38420	FG-SD-sp	FG-SD-gr	102.104	462.786	-2.1803	0.0488118
261832_at	putative S-ribonuclease binding protein SBP1	AT1G10650	AT1G10650	FG-SD-sp	FG-SD-gr	143.032	655.944	-2.19723	0.0429072
259037_at	protein Fes1A	Fes1A	AT3G09350	FG-SD-sp	FG-SD-gr	305.292	1405.53	-2.20285	0.0142476
267377_at	KCS10 (3-KETOACYL-COA SYNTHASE 10); acyltransferase/ catalytic/ transferase, transferring acyl groups other than amino-acyl groups	KCS10	AT2G26250	FG-SD-sp	FG-SD-gr	243.718	1123.85	-2.20516	0.00266587
257206_at	legume lectin-like protein	AT3G16530	AT3G16530	FG-SD-sp	FG-SD-gr	1744.52	8052.36	-2.20658	0.0277385
246944_at	cytochrome bd ubiquinol oxidase	AT5G25450	AT5G25450	FG-SD-sp	FG-SD-gr	147.302	684.705	-2.2167	0.0233066
267238_at	F-box/kelch-repeat protein	AT2G44130	AT2G44130	FG-SD-sp	FG-SD-gr	364.039	1713.02	-2.23438	0.0448082
256525_at	aspartyl protease family protein	AT1G66180	AT1G66180	FG-SD-sp	FG-SD-gr	266.334	1263.08	-2.24564	0.00147023
250110_at	early nodulin-like protein 17	ENODL17	AT5G15350	FG-SD-sp	FG-SD-gr	654.11	3102.38	-2.24577	0.046637
262291_at	calcium-dependent lipid-binding domain-containing protein	AT1G70790	AT1G70790	FG-SD-sp	FG-SD-gr	137.01	652.576	-2.25187	0.0165125
264852_at	MLO8 (MILDEW RESISTANCE LOCUS O 8); calmodulin binding	MLO8	AT2G17480	FG-SD-sp	FG-SD-gr	145.488	695.799	-2.25777	0.0204971
253915_at	EF-hand, calcium binding motif-containing protein	AT4G27280	AT4G27280	FG-SD-sp	FG-SD-gr	1008.49	4832.67	-2.26063	0.0116145
259354_at	heavy-metal-associated domain-containing protein	AT3G05220	AT3G05220	FG-SD-sp	FG-SD-gr	482.504	2321.05	-2.26617	0.0334269
247313_at	SAL1; 3'(2'),5'-bisphosphate nucleotidase/ inositol or phosphatidylinositol phosphatase	SAL1	AT5G63980	FG-SD-sp	FG-SD-gr	205.533	993.392	-2.27299	0.0163319
260208_s_at	probable peroxygenase 4 /// Caleosin-related family protein	AT1G70670 /// AT1G70680	AT1G70670 /// AT1G70680	FG-SD-sp	FG-SD-gr	606.894	2943.52	-2.27803	0.0427282
265723_at	transmembrane receptor protein	AT2G32140	AT2G32140	FG-SD-sp	FG-SD-gr	112.946	549.157	-2.28159	0.00871868
252368_at	CYP94B3; electron carrier/ heme binding / iron ion binding / monooxygenase/ oxygen binding	CYP94B3	AT3G48520	FG-SD-sp	FG-SD-gr	401.361	1985.25	-2.30635	0.0190626
264032_at	GEK1 (GEKO1); D-aminoacyl-tRNA deacylase	GEK1	AT2G03800	FG-SD-sp	FG-SD-gr	203.807	1008.28	-2.30662	0.0247925
247205_at	PROPEP2 (Elicitor peptide 2 precursor)	PROPEP2	AT5G64890	FG-SD-sp	FG-SD-gr	158.714	785.776	-2.30769	0.0126556
265116_at	vacuolar calcium-binding protein-like protein	AT1G62480	AT1G62480	FG-SD-sp	FG-SD-gr	1414.4	7033.29	-2.31401	0.048394
264213_at	ATPP2-A5 (ARABIDOPSIS THALIANA PHLOEM PROTEIN 2 A5); carbohydrate binding	ATPP2-A5	AT1G65390	FG-SD-sp	FG-SD-gr	67.1306	334.628	-2.31752	0.0052245
245251_at	CBL1 (CALCINEURIN B-LIKE PROTEIN 1); calcium ion binding	CBL1	AT4G17615	FG-SD-sp	FG-SD-gr	362.146	1807.75	-2.31955	0.0381098
246370_at	hypothetical protein	AT1G51920	AT1G51920	FG-SD-sp	FG-SD-gr	134.883	676.115	-2.32556	0.00423646
256178_s_at	ILL5; IAA-amino acid conjugate hydrolase/ metallopeptidase	ILL5	AT1G51760 /// AT1G51780	FG-SD-sp	FG-SD-gr	1036.63	5201.42	-2.327	0.0284745
252671_at	FAD/NAD(P)-binding oxidoreductase family protein	AT3G44190	AT3G44190	FG-SD-sp	FG-SD-gr	440.107	2210.62	-2.32853	0.0311093
266316_at	late embryogenesis abundant hydroxyproline-rich glycoprotein	AT2G27080	AT2G27080	FG-SD-sp	FG-SD-gr	1241.77	6276.74	-2.33762	0.0531415
252234_at	ATPSK4 (PHYTOSULFOKINE 4 PRECURSOR); growth factor	ATPSK4	AT3G49780	FG-SD-sp	FG-SD-gr	895.473	4527.22	-2.3379	0.000189437
247443_at	HPP integral membrane domain-containing protein	AT5G62720	AT5G62720	FG-SD-sp	FG-SD-gr	187.499	949.65	-2.34052	0.0488331
265771_at	endonuclease/exonuclease/phosphatase domain-containing protein	AT2G48030	AT2G48030	FG-SD-sp	FG-SD-gr	24.9324	126.837	-2.34688	0.0354999
256009_at	ethylene-responsive transcription factor ERF017	AT1G19210	AT1G19210	FG-SD-sp	FG-SD-gr	117.808	600.21	-2.34903	0.0193192
250152_at	hypothetical protein	AT5G15120	AT5G15120	FG-SD-sp	FG-SD-gr	50.899	261.319	-2.3601	0.012587
253632_at	TET9 (TETRASPANIN9)	TET9	AT4G30430	FG-SD-sp	FG-SD-gr	59.9871	308.254	-2.3614	0.0351532
263184_at	UGT75B1 (UDP-GLUCOSYLTRANSFERASE 75B1); UDP-glucose:4-aminobenzoate acylglucosyltransferase/ UDP-glucosyltransferase/ UDP-glycosyltransferase/ abscisic acid glucosyltransferase/ transferase, transferring glycosyl groups	UGT75B1	AT1G05560	FG-SD-sp	FG-SD-gr	155.09	798.953	-2.365	0.00707724
253693_at	thioredoxin family protein	ACHT2	AT4G29670	FG-SD-sp	FG-SD-gr	1283.89	6628.68	-2.36821	0.0123132
263539_at	TAT3 (TYROSINE AMINOTRANSFERASE 3); L-tyrosine:2-oxoglutarate aminotransferase/ transaminase	TAT3	AT2G24850	FG-SD-sp	FG-SD-gr	286.021	1487.34	-2.37854	0.0312917
252377_at	glucosinolate transporter 1	AT3G47960	AT3G47960	FG-SD-sp	FG-SD-gr	213.256	1129.55	-2.40509	0.0345975
250199_at	MPL1 (MYZUS PERSICAE-INDUCED LIPASE 1); catalytic	MPL1	AT5G14180	FG-SD-sp	FG-SD-gr	881.495	4693.21	-2.41255	0.0262816
266421_at	LP1; calmodulin binding	LP1	AT2G38540	FG-SD-sp	FG-SD-gr	159.775	853.124	-2.41671	0.0303207
265260_at	anac042 (Arabidopsis NAC domain containing protein 42); transcription factor	anac042	AT2G43000	FG-SD-sp	FG-SD-gr	89.4938	479.083	-2.42042	0.0392279
263513_at	hypothetical protein	AT2G12400	AT2G12400	FG-SD-sp	FG-SD-gr	46.8119	254.468	-2.44253	0.0469255
254158_at	hypothetical protein	AT4G24380	AT4G24380	FG-SD-sp	FG-SD-gr	419.236	2280.63	-2.4436	0.0252604
265005_at	hypothetical protein	AT1G61667	AT1G61667	FG-SD-sp	FG-SD-gr	55.8511	307.15	-2.45929	0.00562317
260656_at	hypothetical protein	AT1G19380	AT1G19380	FG-SD-sp	FG-SD-gr	1149.86	6397.57	-2.47606	0.0218879
251494_at	PTI1-like tyrosine-protein kinase 3	AT3G59350	AT3G59350	FG-SD-sp	FG-SD-gr	1148.35	6426.93	-2.48456	0.0289904
249361_at	protein kinase family protein	AT5G40540	AT5G40540	FG-SD-sp	FG-SD-gr	104.975	589.936	-2.49051	0.00250829
256243_at	ATHCHIB (ARABIDOPSIS THALIANA BASIC CHITINASE); chitinase	ATHCHIB	AT3G12500	FG-SD-sp	FG-SD-gr	1046.33	5981.36	-2.51514	0.0499131
263421_at	EXL5 (EXORDIUM LIKE 5)	EXL5	AT2G17230	FG-SD-sp	FG-SD-gr	73.2219	420.228	-2.52083	0.0519118
253259_at	RRTF1 ({REDOX RESPONSIVE TRANSCRIPTION FACTOR 1); DNA binding / transcription factor	RRTF1	AT4G34410	FG-SD-sp	FG-SD-gr	1334.2	7665.16	-2.52234	0.0496358
249850_at	DNAJ heat shock N-terminal domain-containing protein	AT5G23240	AT5G23240	FG-SD-sp	FG-SD-gr	161.237	927.604	-2.52433	0.0374191
265530_at	OPR3 (OPDA-REDUCTASE 3); 12-oxophytodienoate reductase	OPR3	AT2G06050	FG-SD-sp	FG-SD-gr	1723.82	9980.23	-2.53347	0.0290695
259327_at	jacalin-like lectin domain-containing protein	AT3G16460	AT3G16460	FG-SD-sp	FG-SD-gr	148.952	866.855	-2.54094	0.0398483
248179_at	THE1 (THESEUS1); kinase/ protein kinase	THE1	AT5G54380	FG-SD-sp	FG-SD-gr	53.1496	311	-2.54878	0.0238207
254839_at	carboxylate clamp-tetratricopeptide repeat protein	AT4G12400	AT4G12400	FG-SD-sp	FG-SD-gr	27.5591	162.253	-2.55765	0.0392021
262640_at	plant invertase/pectin methylesterase inhibitor domain-containing protein	AT1G62760	AT1G62760	FG-SD-sp	FG-SD-gr	834.896	4978.89	-2.57615	0.00224701
254122_at	CER2 (ECERIFERUM 2); transferase/ transferase, transferring acyl groups other than amino-acyl groups	CER2	AT4G24510	FG-SD-sp	FG-SD-gr	11.9349	71.7973	-2.58874	0.0385623
259729_at	ethylene-responsive transcription factor ERF013	AT1G77640	AT1G77640	FG-SD-sp	FG-SD-gr	54.1797	326.568	-2.59156	0.0506065
248395_at	AtPP2-A14 (Phloem protein 2-A14); carbohydrate binding	AtPP2-A14	AT5G52120	FG-SD-sp	FG-SD-gr	92.2266	557.082	-2.59463	0.0191931
254506_at	GSO1 (GASSHO1); ATP binding / protein binding / protein kinase/ protein serine/threonine kinase/ protein tyrosine kinase	GSO1	AT4G20140	FG-SD-sp	FG-SD-gr	12.0712	73.397	-2.60416	0.0423395
259072_at	FLA18 (FASCICLIN-LIKE ARABINOGALACTAN PROTEIN 18 PRECURSOR)	FLA18	AT3G11700	FG-SD-sp	FG-SD-gr	97.1297	593.291	-2.61076	0.00570912
259664_at	AGP21	AGP21	AT1G55330	FG-SD-sp	FG-SD-gr	52.3738	321.239	-2.61673	0.0222503
267411_at	disease resistance family protein / LRR family protein	AT2G34930	AT2G34930	FG-SD-sp	FG-SD-gr	67.5174	420.099	-2.6374	0.0186894
254562_at	CYP707A1; (+)-abscisic acid 8'-hydroxylase/ oxygen binding	CYP707A1	AT4G19230	FG-SD-sp	FG-SD-gr	75.0944	474.724	-2.66031	0.00275498
247136_at	thiosulfate sulfurtransferase 18	STR18	AT5G66170	FG-SD-sp	FG-SD-gr	388.598	2457.78	-2.66101	0.0458347
257641_s_at	AOC1 (ALLENE OXIDE CYCLASE 1); allene-oxide cyclase	AOC1	AT3G25760 /// AT3G25770	FG-SD-sp	FG-SD-gr	1315.7	8321.85	-2.66108	0.00106557
264280_at	BGLU46 (BETA GLUCOSIDASE 46); catalytic/ cation binding / hydrolase, hydrolyzing O-glycosyl compounds	BGLU46	AT1G61820	FG-SD-sp	FG-SD-gr	143.176	916.273	-2.67799	0.0532249
252488_at	UDP-glycosyltransferase 76E3	AT3G46700	AT3G46700	FG-SD-sp	FG-SD-gr	26.885	173.514	-2.69018	0.00333739
252677_at	NIT3 (NITRILASE 3); indole-3-acetonitrile nitrilase/ indole-3-acetonitrile nitrile hydratase/ nitrilase	NIT3	AT3G44320	FG-SD-sp	FG-SD-gr	148.588	969.272	-2.70559	0.0218101
264887_at	polyketide cyclase/dehydrase and lipid transport superfamily protein	AT1G23120	AT1G23120	FG-SD-sp	FG-SD-gr	383.685	2513.06	-2.71145	0.0153792
258338_at	probable isoaspartyl peptidase/L-asparaginase 2	AT3G16150	AT3G16150	FG-SD-sp	FG-SD-gr	87.3037	573.924	-2.71674	0.00424217
266246_at	CYP94C1; fatty acid (omega-1)-hydroxylase/ oxygen binding	CYP94C1	AT2G27690	FG-SD-sp	FG-SD-gr	122.625	807.919	-2.71996	0.0137025
261933_at	Class-II DAHP synthetase family protein	AT1G22410	AT1G22410	FG-SD-sp	FG-SD-gr	905.413	6123.51	-2.75771	0.0233201
265452_at	ATAIB (ABA-INDUCIBLE BHLH-TYPE TRANSCRIPTION FACTOR); DNA binding / transcription factor	ATAIB	AT2G46510	FG-SD-sp	FG-SD-gr	442.463	3009.27	-2.76579	0.0068374
263972_at	hypothetical protein	AT2G42760	AT2G42760	FG-SD-sp	FG-SD-gr	350.35	2387.14	-2.76841	0.0399895
266884_at	UCC2 (UCLACYANIN 2); copper ion binding / electron carrier	UCC2	AT2G44790	FG-SD-sp	FG-SD-gr	924.503	6349.23	-2.77983	0.0340938
255549_at	GPAT3 (GLYCEROL-3-PHOSPHATE ACYLTRANSFERASE 3); acyltransferase	GPAT3	AT4G01950	FG-SD-sp	FG-SD-gr	216.494	1493	-2.78581	0.0460637
253832_at	hypothetical protein	AT4G27654	AT4G27654	FG-SD-sp	FG-SD-gr	425.943	2943.16	-2.78863	0.0289356
265618_at	hypothetical protein	AT2G25460	AT2G25460	FG-SD-sp	FG-SD-gr	145.638	1007.17	-2.78985	0.0370108
247208_at	SPFH/Band 7/PHB domain-containing membrane-associated protein family	AT5G64870	AT5G64870	FG-SD-sp	FG-SD-gr	77.8115	542.458	-2.80146	0.0413764
245151_at	probable pectinesterase/pectinesterase inhibitor 20	AT2G47550	AT2G47550	FG-SD-sp	FG-SD-gr	47.1117	332.553	-2.81942	0.0245474
259149_at	PAL4 (Phenylalanine ammonia-lyase 4); ammonia ligase/ ammonia-lyase/ catalytic	PAL4	AT3G10340	FG-SD-sp	FG-SD-gr	44.4382	320.604	-2.85092	0.0125709
260686_at	late embryogenesis abundant hydroxyproline-rich glycoprotein	AT1G17620	AT1G17620	FG-SD-sp	FG-SD-gr	172.003	1244.02	-2.85451	0.023299
249208_at	AOS (ALLENE OXIDE SYNTHASE); allene oxide synthase/ hydro-lyase/ oxygen binding	AOS	AT5G42650	FG-SD-sp	FG-SD-gr	324.608	2370.03	-2.86813	0.0470572
267263_at	Late embryogenesis abundant protein, group 6	AT2G23110	AT2G23110	FG-SD-sp	FG-SD-gr	46.6964	343.593	-2.87932	0.00770115
245771_at	hypothetical protein	AT1G30250	AT1G30250	FG-SD-sp	FG-SD-gr	387.11	2933.11	-2.92162	0.0105619
262609_at	salt tolerance-related protein	AT1G13930	AT1G13930	FG-SD-sp	FG-SD-gr	756.463	5859.76	-2.9535	0.0118839
252475_s_at	PCL1 (PHYTOCLOCK 1); DNA binding / transcription factor	PCL1	AT3G46640 /// AT5G59570	FG-SD-sp	FG-SD-gr	92.6215	723.153	-2.96488	0.0102171
257919_at	MYB15 (MYB DOMAIN PROTEIN 15); DNA binding / transcription factor	MYB15	AT3G23250	FG-SD-sp	FG-SD-gr	456.187	3595.05	-2.97832	0.0180319
263918_at	ProT3 (PROLINE TRANSPORTER 3); L-proline transmembrane transporter/ amino acid transmembrane transporter	ProT3	AT2G36590	FG-SD-sp	FG-SD-gr	37.7242	297.336	-2.97853	0.0397557
260237_at	MYB95 (myb domain protein 95); DNA binding / transcription factor	MYB95	AT1G74430	FG-SD-sp	FG-SD-gr	85.3483	674.339	-2.98204	0.000383324
256321_at	LOX1; lipoxygenase	LOX1	AT1G55020	FG-SD-sp	FG-SD-gr	419.491	3339.37	-2.99286	0.00295239
255889_at	WBC11 (WHITE-BROWN COMPLEX HOMOLOG PROTEIN 11); ATPase, coupled to transmembrane movement of substances / fatty acid transporter	WBC11	AT1G17840	FG-SD-sp	FG-SD-gr	112.997	902.663	-2.9979	0.00388362
247215_at	PROPEP3 (Elicitor peptide 3 precursor)	PROPEP3	AT5G64905	FG-SD-sp	FG-SD-gr	417.372	3355.06	-3.00693	0.0197842
261728_at	sks5 (SKU5 Similar 5); copper ion binding / oxidoreductase	sks5	AT1G76160	FG-SD-sp	FG-SD-gr	135.845	1092.64	-3.00778	0.0529173
246097_at	HHP1 (HEPTAHELICAL TRANSMEMBRANE PROTEIN1); receptor	HHP1	AT5G20270	FG-SD-sp	FG-SD-gr	63.2954	513.655	-3.02063	0.043532
245228_at	COBL2 (COBRA-LIKE PROTEIN 2 PRECURSOR)	COBL2	AT3G29810	FG-SD-sp	FG-SD-gr	114.462	936.812	-3.03289	0.0483798
259325_at	O-fucosyltransferase family protein	AT3G05320	AT3G05320	FG-SD-sp	FG-SD-gr	46.1306	378.378	-3.03603	0.000262689
259592_at	LTPG1 (GLYCOSYLPHOSPHATIDYLINOSITOL-ANCHORED LIPID PROTEIN TRANSFER 1)	LTPG1	AT1G27950	FG-SD-sp	FG-SD-gr	149.47	1238.68	-3.05088	0.0157757
266326_at	CB5-C (CYTOCHROME B5 ISOFORM C); heme binding	CB5-C	AT2G46650	FG-SD-sp	FG-SD-gr	175.939	1459.67	-3.0525	0.00716643
247213_at	PROPEP1	PROPEP1	AT5G64900	FG-SD-sp	FG-SD-gr	80.7169	674.508	-3.06289	0.0244203
262756_at	OCT6 (ORGANIC CATION/CARNITINE TRANSPORTER 6); carbohydrate transmembrane transporter/ sugar:hydrogen symporter	43014	AT1G16370	FG-SD-sp	FG-SD-gr	99.0447	839.076	-3.08265	0.053069
258421_at	bidirectional sugar transporter SWEET16	AT3G16690	AT3G16690	FG-SD-sp	FG-SD-gr	61.8536	527.303	-3.0917	0.0377171
267296_at	LBD10 (LOB DOMAIN-CONTAINING PROTEIN 10)	LBD10	AT2G23660	FG-SD-sp	FG-SD-gr	9.26977	80.3901	-3.11641	0.00482835
260556_at	chitinase family protein	AT2G43620	AT2G43620	FG-SD-sp	FG-SD-gr	207.287	1815.91	-3.13099	0.0425107
260406_at	ATGSTU12 (GLUTATHIONE S-TRANSFERASE TAU 12); glutathione transferase	ATGSTU12	AT1G69920	FG-SD-sp	FG-SD-gr	54.4327	488.464	-3.16571	0.00841038
266693_at	MIOX2 (MYO-INOSITOL OXYGENASE 2); inositol oxygenase	MIOX2	AT2G19800	FG-SD-sp	FG-SD-gr	201.612	1813.49	-3.16911	0.0274718
266712_at	D-arabinono-1,4-lactone oxidase-like protein	AT2G46750	AT2G46750	FG-SD-sp	FG-SD-gr	99.8727	936.352	-3.22889	0.0337753
248332_at	ATHSP90.1 (HEAT SHOCK PROTEIN 90.1); ATP binding / unfolded protein binding	ATHSP90.1	AT5G52640	FG-SD-sp	FG-SD-gr	148.509	1396.14	-3.23282	0.0280853
264288_at	hypothetical protein	AT1G62045	AT1G62045	FG-SD-sp	FG-SD-gr	22.3429	210.934	-3.2389	0.033768
249052_at	PDF1.2	PDF1.2	AT5G44420	FG-SD-sp	FG-SD-gr	1061.89	10054.2	-3.24309	0.0356942
263374_at	DNAJ heat shock family protein	AT2G20560	AT2G20560	FG-SD-sp	FG-SD-gr	84.9585	813.909	-3.26004	0.0518879
255690_at	CYP86A2 (CYTOCHROME P450 86 A2); fatty acid (omega-1)-hydroxylase/ oxygen binding	CYP86A2	AT4G00360	FG-SD-sp	FG-SD-gr	82.1338	790.221	-3.26621	0.0261232
260267_at	KCS6 (3-KETOACYL-COA SYNTHASE 6); catalytic/ transferase, transferring acyl groups other than amino-acyl groups	KCS6	AT1G68530	FG-SD-sp	FG-SD-gr	315.479	3052.03	-3.27415	0.00628556
249459_at	peroxidase 62	AT5G39580	AT5G39580	FG-SD-sp	FG-SD-gr	60.4964	605.164	-3.3224	0.00832148
256627_at	hypothetical protein	AT3G19970	AT3G19970	FG-SD-sp	FG-SD-gr	73.6269	739.46	-3.32817	0.00273476
265732_at	hypothetical protein	AT2G01300	AT2G01300	FG-SD-sp	FG-SD-gr	69.7391	704.485	-3.33653	0.0422844
256999_at	chaperone DnaJ-domain containing protein	AT3G14200	AT3G14200	FG-SD-sp	FG-SD-gr	91.618	950.302	-3.37468	0.0476043
266901_at	JAZ7 (JASMONATE-ZIM-DOMAIN PROTEIN 7)	JAZ7	AT2G34600	FG-SD-sp	FG-SD-gr	453.686	4709.17	-3.37571	0.0480445
262947_at	GASA1 (GAST1 PROTEIN HOMOLOG 1)	GASA1	AT1G75750	FG-SD-sp	FG-SD-gr	330.877	3449.93	-3.3822	0.0241559
265414_at	Major facilitator superfamily protein	AT2G16660	AT2G16660	FG-SD-sp	FG-SD-gr	167.322	1837.07	-3.45671	0.0119442
258133_at	MBF1C (MULTIPROTEIN BRIDGING FACTOR 1C); DNA binding / transcription coactivator/ transcription factor	MBF1C	AT3G24500	FG-SD-sp	FG-SD-gr	337.114	3706.12	-3.4586	0.0238
257644_at	AOC3 (ALLENE OXIDE CYCLASE 3); allene-oxide cyclase	AOC3	AT3G25780	FG-SD-sp	FG-SD-gr	400.619	4425.33	-3.46548	0.037793
255786_at	ATCLH1 (ARABIDOPSIS THALIANA CORONATINE-INDUCED PROTEIN 1); chlorophyllase	ATCLH1	AT1G19670	FG-SD-sp	FG-SD-gr	136.404	1526.06	-3.48385	0.00618232
255110_at	peroxidase 37	AT4G08770	AT4G08770	FG-SD-sp	FG-SD-gr	115.033	1332.94	-3.53448	0.0420204
245524_at	bidirectional sugar transporter SWEET17	AT4G15920	AT4G15920	FG-SD-sp	FG-SD-gr	43.2144	502.788	-3.54037	0.00299091
264923_s_at	TPX2 (thioredoxin-dependent peroxidase 2); antioxidant/ oxidoreductase	TPX2	AT1G60740 /// AT1G65970	FG-SD-sp	FG-SD-gr	928.37	10812.5	-3.54186	0.0340134
262225_at	ATPME1; pectinesterase	ATPME1	AT1G53840	FG-SD-sp	FG-SD-gr	90.8403	1092.3	-3.58789	0.00681244
253628_at	XTH18 (XYLOGLUCAN ENDOTRANSGLUCOSYLASE/HYDROLASE 18); hydrolase, acting on glycosyl bonds / hydrolase, hydrolyzing O-glycosyl compounds / xyloglucan:xyloglucosyl transferase	XTH18	AT4G30280	FG-SD-sp	FG-SD-gr	38.0123	465.363	-3.61382	0.0306833
259033_at	pectinacetylesterase family protein	AT3G09405	AT3G09405	FG-SD-sp	FG-SD-gr	126.637	1566.4	-3.62869	0.0231311
266841_at	ATHSFA2; DNA binding / transcription factor	ATHSFA2	AT2G26150	FG-SD-sp	FG-SD-gr	31.5947	400.59	-3.66437	0.00105676
250292_at	JAZ10 (JASMONATE-ZIM-DOMAIN PROTEIN 10)	JAZ10	AT5G13220	FG-SD-sp	FG-SD-gr	301.534	4381.5	-3.86103	0.0348508
264862_at	U-box domain-containing protein 6	AT1G24330	AT1G24330	FG-SD-sp	FG-SD-gr	24.9929	364.136	-3.86489	0.0296509
266821_at	ERF13 (ETHYLENE-RESPONSIVE ELEMENT BINDING FACTOR 13); DNA binding / transcription factor	ERF13	AT2G44840	FG-SD-sp	FG-SD-gr	50.5515	828.284	-4.0343	0.0088943
264477_at	acyl-activating enzyme 2	AT1G77240	AT1G77240	FG-SD-sp	FG-SD-gr	10.334	174.567	-4.07831	0.0106149
249337_at	glycerophosphoryl diester phosphodiesterase family protein	AT5G41080	AT5G41080	FG-SD-sp	FG-SD-gr	83.7997	1433.09	-4.09604	0.0168509
254163_s_at	phosphorylase family protein /// phosphorylase family protein	AT4G24340 /// AT4G24350	AT4G24340 /// AT4G24350	FG-SD-sp	FG-SD-gr	56.1605	967.68	-4.1069	0.00967361
251770_at	jasmonate-regulated protein JRG21	JRG21	AT3G55970	FG-SD-sp	FG-SD-gr	184.68	3205.82	-4.11759	0.0494355
256245_at	HSP70 (heat shock protein 70); ATP binding	HSP70	AT3G12580	FG-SD-sp	FG-SD-gr	161.284	2938.03	-4.18717	0.0457411
246149_at	peroxidase 59	AT5G19890	AT5G19890	FG-SD-sp	FG-SD-gr	17.1964	321.183	-4.22322	0.00121451
251438_s_at	defensin-like protein 206 /// defensin-like protein	AT3G59930 /// AT5G33355	AT3G59930 /// AT5G33355	FG-SD-sp	FG-SD-gr	371.488	7278.7	-4.29229	0.00619487
253505_at	CYP82C2; electron carrier/ heme binding / iron ion binding / monooxygenase/ oxygen binding	CYP82C2	AT4G31970	FG-SD-sp	FG-SD-gr	46.287	943.149	-4.34881	0.0436003
261899_at	CCR2 (CINNAMOYL COA REDUCTASE); cinnamoyl-CoA reductase	CCR2	AT1G80820	FG-SD-sp	FG-SD-gr	23.1721	529.946	-4.51539	0.0501889
260856_at	ethylene-responsive transcription factor ERF012	AT1G21910	AT1G21910	FG-SD-sp	FG-SD-gr	34.0386	786.821	-4.53079	0.00677768
254042_at	XTR6 (XYLOGLUCAN ENDOTRANSGLYCOSYLASE 6); hydrolase, acting on glycosyl bonds / hydrolase, hydrolyzing O-glycosyl compounds / xyloglucan:xyloglucosyl transferase	XTR6	AT4G25810	FG-SD-sp	FG-SD-gr	115.783	2727.47	-4.55807	0.00909095
253044_at	hypothetical protein	AT4G37290	AT4G37290	FG-SD-sp	FG-SD-gr	36.388	882.999	-4.60088	0.0391307
266142_at	L-ornithine N5-acetyltransferase NATA1	AT2G39030	AT2G39030	FG-SD-sp	FG-SD-gr	143.411	3563.72	-4.63515	0.00973477
256349_at	Late embryogenesis abundant-related protein	AT1G54890	AT1G54890	FG-SD-sp	FG-SD-gr	69.4671	1785.07	-4.6835	0.0478648
262911_s_at	class I heat shock protein /// HSP20-like chaperone	AT1G07400 /// AT1G59860	AT1G07400 /// AT1G59860	FG-SD-sp	FG-SD-gr	15.9315	462.19	-4.85853	0.0419492
258299_at	long-chain-alcohol oxidase FAO3	FAO3	AT3G23410	FG-SD-sp	FG-SD-gr	6.2325	308.079	-5.62735	0.0272787
260666_at	PARVUS (PARVUS); polygalacturonate 4-alpha-galacturonosyltransferase/ transferase, transferring glycosyl groups / transferase, transferring hexosyl groups	PARVUS	AT1G19300	FG-SD-sp	FG-SD-gr	3.84287	206.86	-5.75032	0.0258289
255064_at	EXO (EXORDIUM)	EXO	AT4G08950	FG-SD-sp	FG-SD-gr	42.1801	3085.87	-6.19297	0.0118549
